# Supplementary material
Source: PubMed Central journal article supplement (PMC4431913)
Supplement: NIHMS688312-supplement-Supp.pdf [file NIHMS688312-supplement-Supp.pdf]

# $\gamma$ , $\delta$ , $\epsilon$ -C(sp<sup>3</sup>)-H Functionalization through A Directed Radical H-Abstraction

Tao Liu, Tian-Sheng Mei and Jin-Quan Yu\*

Department of Chemistry, The Scripps Research Institute, 10550 North Torrey Pines Road, La Jolla,  
California 92037

## Table of Contents

|                                                                     |    |
|---------------------------------------------------------------------|----|
| <b>1 General Information</b> .....                                  | 2  |
| <b>2 Experimental Section</b> .....                                 | 3  |
| <b>2.1 Synthesis of Starting Materials</b> .....                    | 3  |
| <b>2.2 Optimization of Lactamization Reaction</b> .....             | 10 |
| <b>2.3 General Procedure for Directed Radical Reaction</b> .....    | 14 |
| <b>2.4 Procedure for Ring Opening of Lactams</b> .....              | 23 |
| <b>3 Reference</b> .....                                            | 26 |
| <b>4 NMR Spectra of New Compounds</b> .....                         | 27 |
| <b>5 X-Ray Crystallographic Analysis</b> .....                      | 55 |
| <b>5.1 X-Ray Crystallographic Analysis of Iodo Lactam 3a</b> .....  | 55 |
| <b>5.2 X-Ray Crystallographic Analysis of Vinyl Lactam 7a</b> ..... | 61 |

## 1 General Information

Octafluorotoluene and TMSN<sub>3</sub> were obtained from Oakwood Chemical. Other solvents and chemicals were from Sigma-Aldrich, Acros and Alfa Aesar and used directly without further purification. Analytical thin layer chromatography was performed on 0.25 mm silica gel 60-F254. Visualization was carried out with UV light and Vogel's permanganate. Preparative TLC was performed on 1.0 mm silica gel (Analtech). Columns for flash chromatography (FC) contained silica gel (32–63 $\mu$ , Dynamic Adsorbents, Inc.). <sup>1</sup>H NMR spectra were recorded on Bruker AV-400 instrument (400 MHz) or Varian Inova 400 (400 MHz), Bruker DRX-600 instrument (600 MHz). Chemical shifts were quoted in parts per million (ppm) referenced to 0.0 ppm for tetramethylsilane. <sup>13</sup>C NMR spectra were recorded on Bruker DRX-600 instrument (150 MHz), and were fully decoupled by broad band proton decoupling. Chemical shifts were reported in ppm referenced to the center line of a triplet at 77.0 ppm of chloroform-*d*. In the <sup>13</sup>C NMR analysis, peaks that correspond to those of the polyfluoroarylamide auxiliary appeared as nearly invisible, complex sets of multiplets; they are omitted in the following spectroscopic analysis. High-resolution mass spectra (HRMS) were recorded on an Agilent Mass spectrometer using ESI-TOF (electrospray ionization-time of flight).

## 2 Experimental Section

### 2.1 Synthesis of Starting Materials

#### General Procedure for the Preparation of Amide Substrates from 4-Trifluoromethyl benzenesulfonamide:

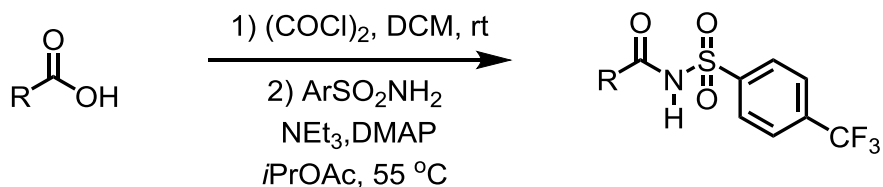

Amide substrates are prepared from benzenesulfonamides according to the literature<sup>1</sup> with minor modifications. 4-Trifluoromethyl benzenesulfonamide (5 mmol), triethylamine (12.5 mmol) and DMAP (0.025 mmol) were added into isopropyl acetate (10 mL) under nitrogen at room temperature. The mixture was heated to 55 °C. A toluene (3 mL) solution of acid chloride (5.5 mmol), prepared from corresponding carboxylic acid and oxalyl chloride, was added slowly over 1h. After the addition was completed, the mixture was maintained at 55 °C for one hour. After cooling to room temperature, the reaction was quenched with water (1.1 mL) and treated with 0.7 M HCl (16.90 mL). Aqueous phase was extracted with ethyl acetate. Combined organic phases were dried with anhydrous Na<sub>2</sub>SO<sub>4</sub>, concentrated under reduced pressure, and purified by flash column chromatography (silica gel, hexane/EtOAc 10/1 to 5/1).

#### General Procedure for the Preparation of Amide Substrates from 2,3,5,6-Tetrafluoro-4-(trifluoromethyl)aniline:

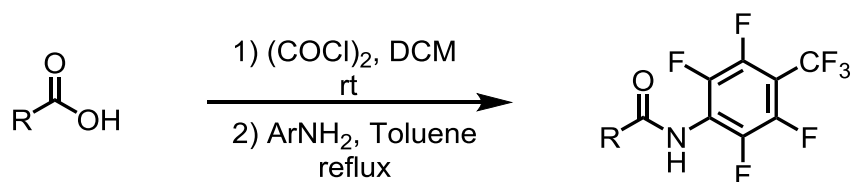

An acid chloride (10 mmol), prepared from the corresponding carboxylic acid and oxalyl chloride, was added to a solution of 2,3,5,6-tetrafluoro-4-(trifluoromethyl)aniline (10 mmol) in toluene (10 mL). The reaction mixture was stirred for 12 h under reflux. After cooling to room temperature, the product mixture was concentrated in vacuum and was recrystallized from ethyl acetate/hexane to give desired amide.

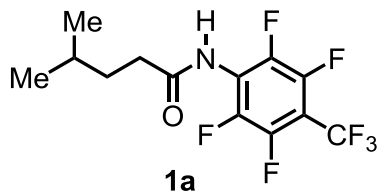

**4-Methyl-N-(2,3,5,6-tetrafluoro-4-(trifluoromethyl)phenyl)pentanamide (1a)**

$^1\text{H}$  NMR (400 MHz,  $\text{CDCl}_3$ )  $\delta$  7.01 (s, 1H), 2.30–2.24 (m, 2H), 1.56–1.40 (m, 3H), 0.89 (d,  $J = 6.4$  Hz, 6H).  $^{13}\text{C}$  NMR (150 MHz,  $\text{CDCl}_3$ )  $\delta$  170.15, 34.00, 32.43, 26.99, 21.63. HRMS (ESI-TOF) Calcd for  $\text{C}_{13}\text{H}_{11}\text{F}_7\text{NO}$   $[\text{M}-\text{H}]^-$ : 330.0734; found: 330.0738.

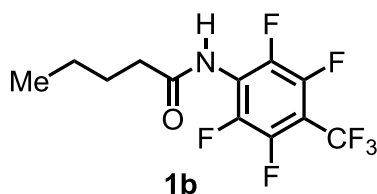

**N-(2,3,5,6-tetrafluoro-4-(trifluoromethyl)phenyl)pentanamide (1b)**

$^1\text{H}$  NMR (400 MHz,  $\text{CDCl}_3$ )  $\delta$  7.01 (s, 1H), 2.30–2.24 (m, 2H), 1.68–1.30 (m, 4H), 0.93 (d,  $J = 6.8$  Hz, 3H).  $^{13}\text{C}$  NMR (150 MHz,  $\text{CDCl}_3$ )  $\delta$  169.93, 33.91, 30.27, 21.90, 19.40. HRMS (ESI-TOF) Calcd for  $\text{C}_{12}\text{H}_9\text{F}_7\text{NO}$   $[\text{M}-\text{H}]^-$ : 316.0578; found: 316.0581.

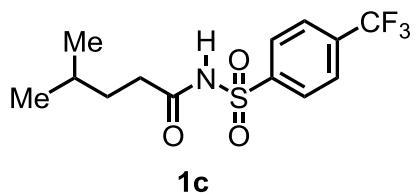

**4-Methyl-N-((4-(trifluoromethyl)phenyl)sulfonyl)pentanamide (1c)**

$^1\text{H}$  NMR (400 MHz,  $\text{CDCl}_3$ )  $\delta$  8.40 (s, 1H), 8.21 (d,  $J = 8.0$  Hz, 2H), 7.87 (d,  $J = 8.0$  Hz, 2H), 2.36–2.25 (m, 2H), 1.60–1.43 (m, 3H), 0.87 (d,  $J = 6.4$  Hz, 6H).  $^{13}\text{C}$  NMR (150 MHz,  $\text{CDCl}_3$ )  $\delta$  170.22, 141.43, 135.12 (q,  $J = 33.0$  Hz), 128.60, 125.68 (q,  $J = 3.6$  Hz), 122.60 (q,  $J = 279.0$  Hz), 34.00, 32.43, 26.99, 21.63. HRMS (ESI-TOF) Calcd for  $\text{C}_{13}\text{H}_{15}\text{F}_3\text{NO}_3\text{S}$   $[\text{M}-\text{H}]^-$ : 322.0730; found: 322.0726.

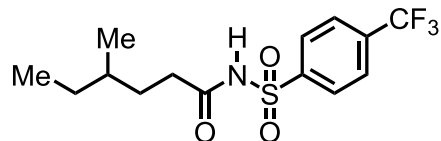

**1d**

**4-Methyl-N-((4-(trifluoromethyl)phenyl)sulfonyl)hexanamide (1d)**

$^1\text{H}$  NMR (400 MHz,  $\text{CDCl}_3$ )  $\delta$  8.39 (s, 1H), 8.23 (d,  $J = 7.6$  Hz, 2H), 7.84 (d,  $J = 7.6$ , 2H), 2.36–2.20 (m, 2H), 1.42–1.38 (m, 1H), 1.32–1.29 (m, 3H), 1.17–1.08 (m, 1H), 0.86–0.82 (m, 6H).  $^{13}\text{C}$  NMR (150 MHz,  $\text{CDCl}_3$ )  $\delta$  170.90, 141.90, 135.81 (q,  $J = 33.3$  Hz), 129.11, 126.28 (q,  $J = 3.6$  Hz), 122.90 (q,  $J = 271.0$  Hz), 33.80, 33.30, 30.24, 28.55, 18.24, 10.72. HRMS (ESI-TOF) Calcd for  $\text{C}_{14}\text{H}_{17}\text{F}_3\text{NO}_3\text{S}$  [ $\text{M}-\text{H}$ ] $^-$ : 336.0887; found: 336.0871.

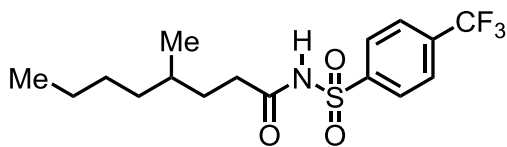

**1e**

**4-Methyl-N-((4-(trifluoromethyl)phenyl)sulfonyl)octanamide (1e)**

$^1\text{H}$  NMR (400 MHz,  $\text{CDCl}_3$ )  $\delta$  8.42 (s, 1H), 8.24 (d,  $J = 8.2$  Hz, 2H), 7.5 (d,  $J = 8.2$  Hz, 2H), 2.36–2.20 (m, 2H), 1.64–1.59 (m, 1H), 1.45–1.32 (m, 2H), 1.30–1.17 (m, 5H), 1.13–1.07 (m, 1H), 0.88 (t,  $J = 7.1$  Hz, 3H), 0.83 (d,  $J = 6.4$  Hz, 3H).  $^{13}\text{C}$  NMR (150 MHz,  $\text{CDCl}_3$ )  $\delta$  170.34, 141.43, 134.90 (q,  $J = 33.6$  Hz), 128.26, 125.48 (q,  $J = 3.6$  Hz), 122.19 (q,  $J = 274.0$  Hz), 35.73, 33.76, 31.68, 30.64, 28.57, 22.39, 18.73, 13.58. HRMS (ESI-TOF) Calcd for  $\text{C}_{16}\text{H}_{21}\text{F}_3\text{NO}_3\text{S}$  [ $\text{M}-\text{H}$ ] $^-$ : 364.1200; found: 364.1196.

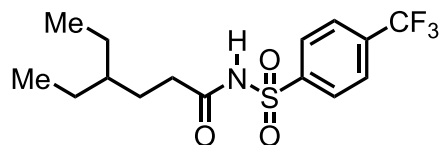

**1f**

**4-Ethyl-N-((4-(trifluoromethyl)phenyl)sulfonyl)hexanamide (1f)**

$^1\text{H}$  NMR (400 MHz,  $\text{CDCl}_3$ )  $\delta$  8.39 (s, 1H), 8.24 (d,  $J = 8.3$  Hz, 2H), 7.85 (d,  $J = 8.3$  Hz, 2H), 2.29–2.22 (m, 2H), 1.58–1.50 (m, 2H), 1.28–1.19 (m, 4H), 1.16–1.10 (m, 1H), 0.82 (t,  $J = 7.4$  Hz, 6H).  $^{13}\text{C}$  NMR (150 MHz,  $\text{CDCl}_3$ )  $\delta$  170.35, 141.43, 135.02 (q,  $J = 33.0$  Hz), 128.30, 125.48 (q,  $J = 3.7$  Hz), 122.20 (q,  $J$

= 278.0 Hz), 39.19, 33.53, 26.63, 24.51, 10.19. HRMS (ESI-TOF) Calcd for C<sub>15</sub>H<sub>19</sub>F<sub>3</sub>NO<sub>3</sub>S [M-H]<sup>-</sup>: 350.1043; found: 350.1038.

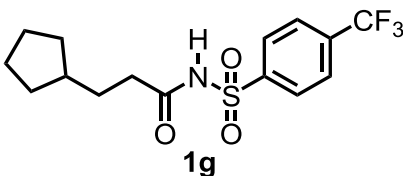

### 3-Cyclopentyl-N-((4-(trifluoromethyl)phenyl)sulfonyl)propanamide (1g)

<sup>1</sup>H NMR (400 MHz, CDCl<sub>3</sub>) δ 8.43 (s, 1H), 8.24 (d, *J* = 8.1 Hz, 2H), 7.99 (d, *J* = 8.1 Hz, 2H), 2.39–2.20 (m, 2H), 1.76–1.66 (m, 4H), 1.63–1.56 (m, 4H), 1.53–1.46 (m, 2H), 1.08–0.98 (m, 1H). <sup>13</sup>C NMR (150 MHz, CDCl<sub>3</sub>) δ 170.36, 141.49, 135.22 (q, *J* = 33.5 Hz), 128.58, 125.60 (q, *J* = 3.6 Hz), 122.32 (q, *J* = 280.0 Hz), 38.86, 35.30, 31.85, 29.90, 24.54. HRMS (ESI-TOF) Calcd for C<sub>15</sub>H<sub>17</sub>F<sub>3</sub>NO<sub>3</sub>S [M-H]<sup>-</sup>: 348.0887; found: 348.0885.

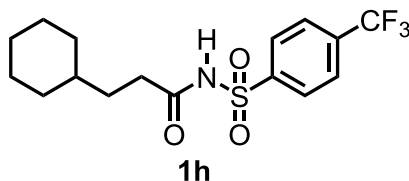

### 3-Cyclohexyl-N-((4-(trifluoromethyl)phenyl)sulfonyl)propanamide (1h)

<sup>1</sup>H NMR (400 MHz, CDCl<sub>3</sub>) δ 8.41 (s, 1H), 8.23 (d, *J* = 7.9 Hz, 2H), 7.97 (d, *J* = 7.9 Hz, 2H), 2.34–2.21 (m, 2H), 1.71–1.59 (m, 6H), 1.51–1.45 (m, 2H), 1.19–1.11 (m, 3H), 0.84–0.82 (m, 2H). <sup>13</sup>C NMR (150 MHz, CDCl<sub>3</sub>) δ 170.49, 141.87, 135.29 (q, *J* = 33.2 Hz), 128.56, 125.78 (q, *J* = 3.6 Hz), 122.60 (q, *J* = 274.80 Hz), 36.46, 33.55, 32.38, 31.07, 25.87, 25.59. HRMS (ESI-TOF) Calcd for C<sub>16</sub>H<sub>19</sub>F<sub>3</sub>NO<sub>3</sub>S [M-H]<sup>-</sup>: 362.1043; found: 362.1041.

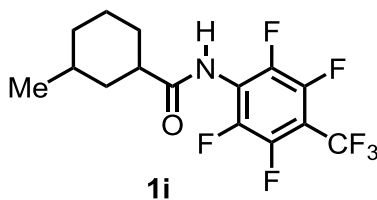

### 3-Methyl-N-(2,3,5,6-tetrafluoro-4-(trifluoromethyl)phenyl)cyclohexane-1-carboxamide (1i)

<sup>1</sup>H NMR (400 MHz, CDCl<sub>3</sub>) δ 6.97 (s, 1H), 2.45 (tt, *J* = 12.1, 3.5 Hz, 1H), 2.07–1.95 (m, 2H), 1.93–1.91 (m, 1H), 1.79–1.72 (m, 1H), 1.68–1.60 (m, 1H), 1.52–1.47 (m, 1H), 1.38–1.32 (m, 1H), 1.28–1.17 (m,

1H), 0.99 (d,  $J = 6.6$  Hz, 3H), 0.99–0.94 (m, 1H).  $^{13}\text{C}$  NMR (150 MHz,  $\text{CDCl}_3$ )  $\delta$  180.19, 45.11, 37.33, 33.72, 31.71, 28.66, 24.99, 22.09. HRMS (ESI-TOF) Calcd for  $\text{C}_{15}\text{H}_{13}\text{F}_7\text{NO}$   $[\text{M}-\text{H}]^-$ : 356.0891; found: 356.0886.

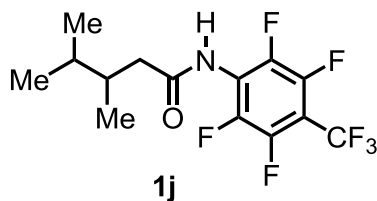

**3,4-Dimethyl-N-(2,3,5,6-tetrafluoro-4-(trifluoromethyl)phenyl)pentanamide (1j)**

$^1\text{H}$  NMR (400 MHz,  $\text{CDCl}_3$ )  $\delta$  7.01 (s, 1H), 2.56 (dd,  $J = 14.3, 5.1$  Hz, 1H), 2.23 (dd,  $J = 14.3, 9.5$  Hz, 1H), 2.04–1.96 (m, 1H), 1.72–1.67 (m, 1H), 0.99 (d,  $J = 6.8$  Hz, 3H), 0.95 (d,  $J = 6.8$  Hz, 3H), 0.92 (d,  $J = 6.8$  Hz, 3H).  $^{13}\text{C}$  NMR (150 MHz,  $\text{CDCl}_3$ )  $\delta$  170.15, 40.85, 36.01, 31.66, 19.38, 17.83, 15.15. HRMS (ESI-TOF) Calcd for  $\text{C}_{14}\text{H}_{13}\text{F}_7\text{NO}$   $[\text{M}-\text{H}]^-$ : 344.0891; found: 344.0892.

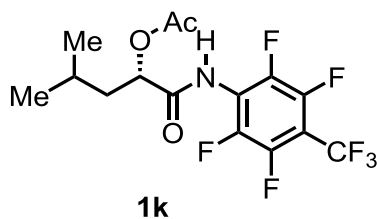

**(S)-4-Methyl-1-oxo-1-((2,3,5,6-tetrafluoro-4-(trifluoromethyl)phenyl)amino)pentan-2-yl acetate (1k)**

$^1\text{H}$  NMR (400 MHz,  $\text{CDCl}_3$ )  $\delta$  7.67 (s, 1H), 5.41 (dd,  $J = 8.8, 4.7$  Hz, 1H), 2.24 (s, 3H), 1.92–1.88 (m, 1H), 1.86–1.76 (m, 2H), 1.02 (d,  $J = 6.4$  Hz, 3H), 1.00 (d,  $J = 6.3$  Hz, 3H).  $^{13}\text{C}$  NMR (150 MHz,  $\text{CDCl}_3$ )  $\delta$  169.53, 167.60, 72.35, 39.93, 24.03, 22.46, 21.45, 20.39. HRMS (ESI-TOF) Calcd for  $\text{C}_{15}\text{H}_{13}\text{F}_7\text{NO}_3$   $[\text{M}-\text{H}]^-$ : 388.0789; found: 388.0784.

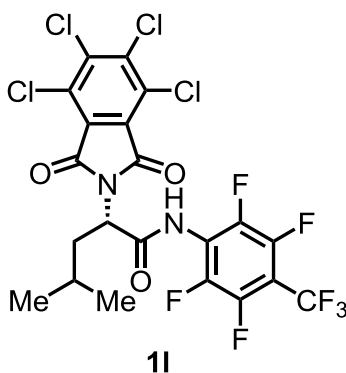

**(S)-4-Methyl-2-(4,5,6,7-tetrachloro-1,3-dioxoisindolin-2-yl)-N-(2,3,5,6-tetrafluoro-4-(trifluoromethyl)phenyl)pentanamide (II)**

$^1\text{H}$  NMR (400 MHz,  $\text{CDCl}_3$ )  $\delta$  8.15 (s, 1H), 5.18 (dd,  $J = 10.9, 5.7$  Hz, 1H), 2.47–2.12 (m, 2H), 1.60–1.51 (m, 1H), 1.06–0.95 (m, 6H).  $^{13}\text{C}$  NMR (150 MHz,  $\text{CDCl}_3$ )  $\delta$  165.99, 163.08, 140.60, 129.94, 126.44, 53.79, 37.21, 24.86, 22.38, 20.95. HRMS (ESI-TOF) Calcd for  $\text{C}_{21}\text{H}_{10}\text{Cl}_4\text{F}_7\text{N}_2\text{O}_3$  [M-H] $^-$ : 610.9339; found:610.9343.

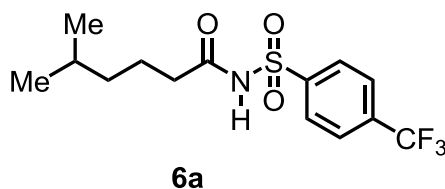

**5-Methyl-N-((4-(trifluoromethyl)phenyl)sulfonyl)hexanamide (6a)**

$^1\text{H}$  NMR (400 MHz,  $\text{CDCl}_3$ )  $\delta$  8.43 (s, 1H), 8.24 (d,  $J = 8.2$  Hz, 2H), 7.89 (d,  $J = 8.2$  Hz, 2H), 2.31–2.22 (m, 2H), 1.63–1.55 (m, 2H), 1.51–1.46 (m, 1H), 1.17–1.08 (m, 2H), 0.85 (d,  $J = 6.6$  Hz, 6H).  $^{13}\text{C}$  NMR (150 MHz,  $\text{CDCl}_3$ )  $\delta$  170.15, 141.93, 136.00 (q,  $J = 33.0$  Hz), 128.21, 125.14 (q,  $J = 3.5$  Hz), 121.91 (q,  $J = 276.1$  Hz), 37.50, 36.17, 27.22, 21.87, 21.69. HRMS (ESI-TOF) Calcd for  $\text{C}_{14}\text{H}_{17}\text{F}_3\text{NO}_3\text{S}$  [M-H] $^-$ : 336.0887; found:336.0885.

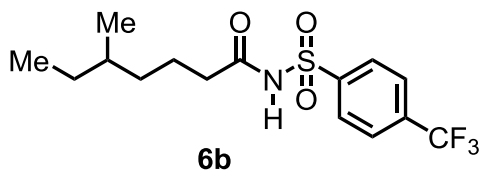

**5-Methyl-N-((4-(trifluoromethyl)phenyl)sulfonyl)heptanamide (6b)**

$^1\text{H}$  NMR (400 MHz,  $\text{CDCl}_3$ )  $\delta$  8.39 (s, 1H), 8.24 (d,  $J = 8.1$  Hz, 2H), 7.93 (d,  $J = 8.1$  Hz, 2H), 2.29–2.23 (m, 2H), 1.59–1.49 (m, 2H), 1.28–1.10 (m, 4H), 1.08–1.04 (m, 1H), 0.84–0.80 (m, 6H).  $^{13}\text{C}$  NMR (150 MHz,  $\text{CDCl}_3$ )  $\delta$  170.13, 141.33, 135.78 (q,  $J = 33.2$  Hz), 128.91, 125.48 (q,  $J = 3.6$  Hz), 121.94 (q,  $J = 279.0$  Hz), 36.26, 35.16, 33.59, 28.70, 21.44, 18.47, 10.77. HRMS (ESI-TOF) Calcd for  $\text{C}_{15}\text{H}_{19}\text{F}_3\text{NO}_3\text{S}$  [M-H] $^-$ : 350.1043; found: 350.1040.

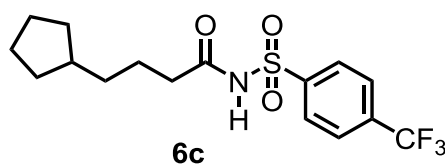



**4-Cyclopentyl-*N*-((4-(trifluoromethyl)phenyl)sulfonyl)butanamide (6c)**

$^1\text{H}$  NMR (400 MHz,  $\text{CDCl}_3$ )  $\delta$  8.75 (s, 1H), 8.39 (d,  $J = 8.3$  Hz, 2H), 7.85 (d,  $J = 8.3$  Hz, 2H), 2.26–2.21 (m, 2H), 1.69–1.60 (m, 2H), 1.54–1.48 (m, 4H), 1.28–1.21 (m, 3H), 1.07–0.93 (m, 2H).  $^{13}\text{C}$  NMR (150 MHz,  $\text{CDCl}_3$ )  $\delta$  170.52, 141.72, 135.51 (q,  $J = 33.2$  Hz), 128.76, 125.36 (q,  $J = 3.6$  Hz), 122.41 (q,  $J = 271.0$  Hz), 39.22, 36.17, 34.82, 32.04, 24.62, 23.04. HRMS (ESI-TOF) Calcd for  $\text{C}_{16}\text{H}_{19}\text{F}_3\text{NO}_3\text{S}$  [ $\text{M}-\text{H}$ ] $^-$ : 362.1043; found: 362.1041.

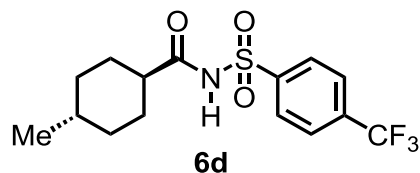

**(1*r*,4*r*)-4-Methyl-*N*-((4-(trifluoromethyl)phenyl)sulfonyl)cyclohexane-1-carboxamide (6d)**

$^1\text{H}$  NMR (400 MHz,  $\text{CDCl}_3$ )  $\delta$  8.38 (s, 1H), 8.23 (d,  $J = 8.2$ , 2H), 7.84 (d,  $J = 8.3$ , 2H), 2.09 (tt,  $J = 12.2$ , 3.5 Hz, 1H), 1.91–1.82 (m, 2H), 1.81–1.74 (m, 2H), 1.39–1.35 (m, 2H), 1.34–1.29 (m, 2H), 0.89 (d,  $J = 6.6$  Hz, 3H).  $^{13}\text{C}$  NMR (150 MHz,  $\text{CDCl}_3$ )  $\delta$  172.96, 141.12, 135.03 (q,  $J = 33.4$  Hz), 128.17, 125.70 (q,  $J = 3.6$  Hz), 122.54 (q,  $J = 268.0$  Hz), 44.66, 33.39, 31.24, 28.23, 21.79. HRMS (ESI-TOF) Calcd for  $\text{C}_{15}\text{H}_{17}\text{F}_3\text{NO}_3\text{S}$  [ $\text{M}-\text{H}$ ] $^-$ : 348.0887; found: 348.0890.

## 2.2 Optimization of Lactamization Reaction

General: The reactions were conducted using 0.1 mmol of substrate in the indicated conditions in solvents. The temperature was detected from oil bath.

### Radical Initiator Screening<sup>a,b</sup>

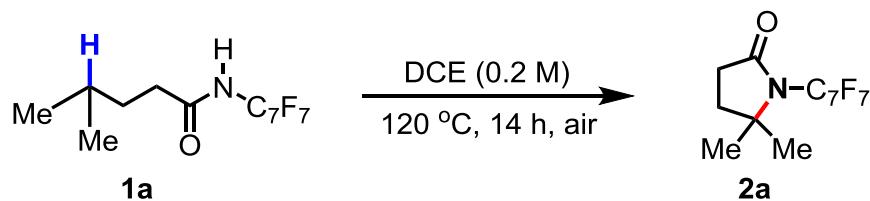

| Entry | Radical Initiator                      | Amount (equiv) | NMR Yield (%) |
|-------|----------------------------------------|----------------|---------------|
| 1     | <i>t</i> BuOOH                         | 2.0            | 0             |
| 2     | ( <i>t</i> BuO) <sub>2</sub>           | 2.0            | 0             |
| 3     | NIS                                    | 2.0            | 67            |
| 4     | NBS                                    | 2.0            | 37            |
| 5     | NCS                                    | 2.0            | 15            |
| 6     | PhI(OAc) <sub>2</sub>                  | 2.0            | Trace         |
| 7     | PhI(OTFA) <sub>2</sub>                 | 2.0            | Trace         |
| 8     | I <sub>2</sub>                         | 2.0            | 0             |
| 9     | PhI(OAc) <sub>2</sub> +I <sub>2</sub>  | 1.5 + 1.5      | 66            |
| 10    | PhI(OTFA) <sub>2</sub> +I <sub>2</sub> | 1.5 + 1.5      | 43            |
| 11    | NIS                                    | 3.0            | 76            |
| 12    | NIS                                    | 4.0            | 56            |

<sup>a</sup> Conditions: **1a** (0.1 mmol), radical initiator, DCE (0.5 mL), 120 °C, air, 14 h. <sup>b</sup> All yields were determined by <sup>1</sup>H NMR using CH<sub>2</sub>Br<sub>2</sub> as the internal standard.

## Solvent Screening<sup>a,b</sup>

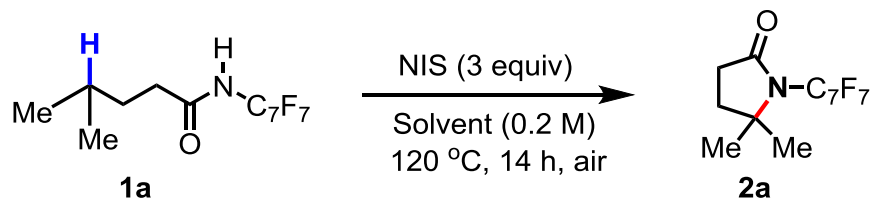

| Entry           | Solvent                                       | NMR Yield (%) |
|-----------------|-----------------------------------------------|---------------|
| 1               | C <sub>6</sub> F <sub>5</sub> CF <sub>3</sub> | 62            |
| 2               | PhCF <sub>3</sub>                             | 41            |
| 3               | C <sub>6</sub> F <sub>6</sub>                 | 57            |
| 4               | Hexane                                        | 20            |
| 5               | Toluene                                       | 15            |
| 6               | DCE                                           | 76            |
| 7               | HFIP                                          | Trace         |
| 8               | <i>t</i> -BuOH                                | Trace         |
| 9               | DMF                                           | 12            |
| 10              | DMSO                                          | 14            |
| 11              | EA                                            | 59            |
| 12              | THF                                           | Trace         |
| 13 <sup>c</sup> | DCE                                           | 74            |
| 14 <sup>d</sup> | DCE                                           | 61            |

<sup>a</sup> Conditions: **1a** (0.1 mmol), NIS (3 equiv.), solvent (0.5 mL), 120 °C, air, 14 h. <sup>b</sup> All yields were determined by <sup>1</sup>H NMR using CH<sub>2</sub>Br<sub>2</sub> as the internal standard. <sup>c</sup> Reaction was carried out in N<sub>2</sub> (1 atm). <sup>d</sup> Reaction was carried out in O<sub>2</sub> (1 atm).

## Concentration Screening<sup>a,b</sup>

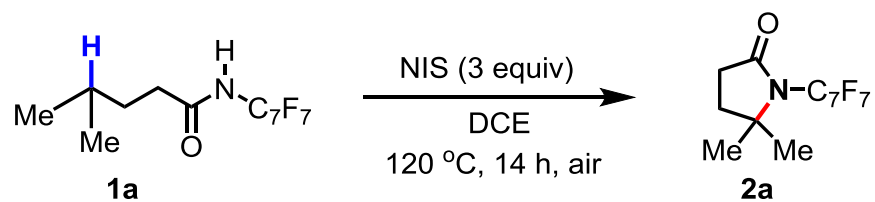

| Entry | Concentration (M) | NMR Yield (%) |
|-------|-------------------|---------------|
| 1     | 0.2               | 76            |
| 2     | 0.1               | 82            |
| 3     | 0.05              | 54            |
| 4     | 0.025             | 23            |

<sup>a</sup> Conditions: **1a** (0.1 mmol), NIS (3 equiv.), DCE, 120 °C, air, 14 h. <sup>b</sup> All yields were determined by <sup>1</sup>H NMR using CH<sub>2</sub>Br<sub>2</sub> as the internal standard.

### Optimization of Temperature<sup>a,b</sup>

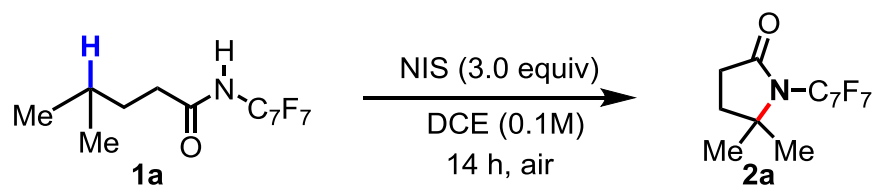

| Entry | Temperature (°C) | NMR Yield (%) |
|-------|------------------|---------------|
| 1     | 120              | 82            |
| 2     | 110              | 87            |
| 3     | 100              | 92            |
| 4     | 90               | 79            |

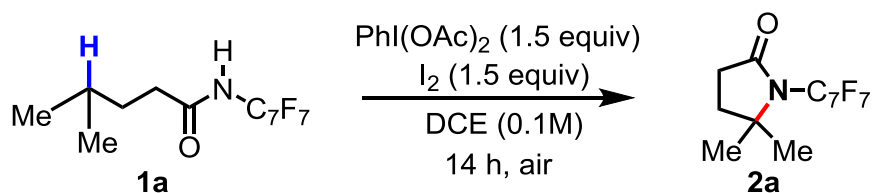

| Entry          | Temperature (°C) | NMR Yield (%) |
|----------------|------------------|---------------|
| 1              | 120              | 66            |
| 2              | 90               | 71            |
| 3              | 60               | 73            |
| 4              | r.t.             | 79            |
| 5 <sup>c</sup> | r.t.             | 89            |

<sup>a</sup> Conditions: **1a** (0.1 mmol), NIS (3 equiv.) or PhI(OAc)<sub>2</sub> (1.5 equiv.) and I<sub>2</sub> (1.5 equiv.), DCE (1.0 mL), air, 14 h. <sup>b</sup> All yields were determined by <sup>1</sup>H NMR using CH<sub>2</sub>Br<sub>2</sub> as the internal standard. <sup>c</sup> 48 h.

### 2.3 General Procedure for Directed Radical Reaction

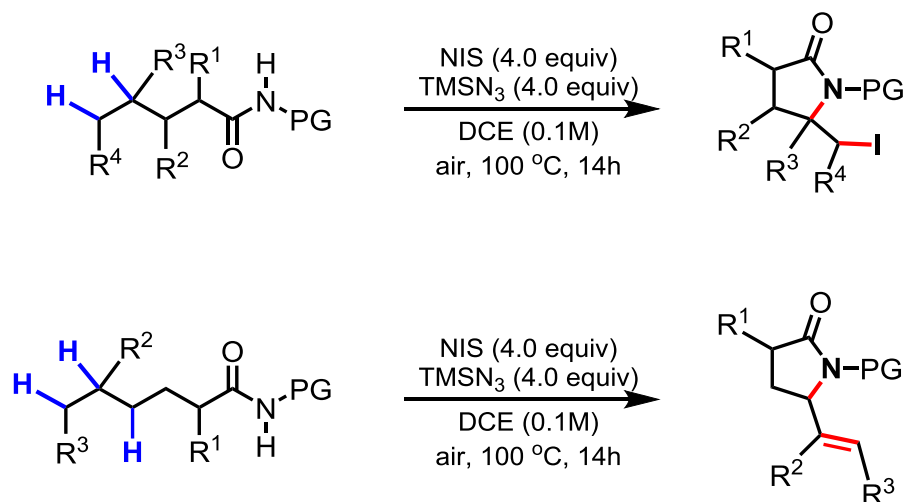

To an oven dried microwave tube (5 mL) equipped with a magnetic stir bar was added substrate (0.1 mmol), NIS (69.2mg, 0.4 mmol) and 1 mL of DCE followed by TMSN<sub>3</sub> (53 uL, 0.4 mmol). The mixture was covered with safety shield, then was heated to 100 °C for 14 hours under vigorous stirring. Upon completion, the reaction mixture was cooled to room temperature. The reaction mixture was diluted with 4 mL dichloromethane and then treated with 5 mL saturated aqueous Na<sub>2</sub>S<sub>2</sub>O<sub>3</sub> solution. Aqueous phase was extracted with 5 mL dichloromethane twice. Combined organic phases were dried with Na<sub>2</sub>SO<sub>4</sub>. The solvents were removed under reduced pressure and the resulting mixture was purified by preparative TLC using hexane/EtOAc as the eluent.

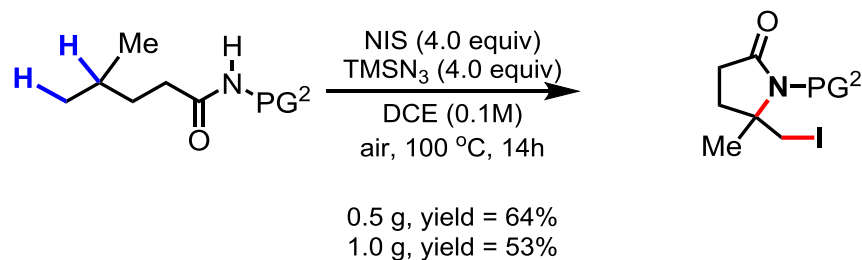

To a 50 mL pressure vessel equipped with a magnetic stir bar was added substrate (0.5 g or 1.0 g), NIS (4 equiv) and DCE (0.1 M) followed by addition of TMSN<sub>3</sub> (4 equiv). Pressure vessel was covered with safety shield, then was heated to 100 °C for 14 hours under vigorous stirring. Upon completion, the reaction mixture was cooled to room temperature. The reaction mixture was diluted with 40 mL dichloromethane and then treated with saturated aqueous Na<sub>2</sub>S<sub>2</sub>O<sub>3</sub> solution. Aqueous phase was extracted with dichloromethane twice. Combined organic phases were dried with Na<sub>2</sub>SO<sub>4</sub>. The solvents were

removed under reduced pressure and the resulting mixture was purified by flash column chromatography (silica gel, hexane/EtOAc 10/1 to 3/1).

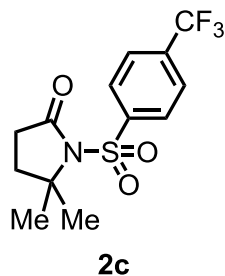

### 5,5-Dimethyl-1-((4-(trifluoromethyl)phenyl)sulfonyl)pyrrolidin-2-one (2c)

Substrate was treated with standard reagents for 2 hours. After purification by preparative TLC (eluent: hexane/EtOAc = 5/1), compound was obtained as a white solid (25.7 mg, 80%). <sup>1</sup>H NMR (400 MHz, CDCl<sub>3</sub>) δ 8.22 (d, *J* = 8.2 Hz, 2H), 7.82 (d, *J* = 8.2 Hz, 2H), 2.28 (t, *J* = 7.6 Hz, 2H), 1.46 (t, *J* = 7.6 Hz, 2H), 0.81 (s, 3H), 0.81 (s, 3H). <sup>13</sup>C NMR (150 MHz, CDCl<sub>3</sub>) δ. 171.39, 141.82, 135.59 (q, *J* = 34.2 Hz), 128.96, 126.17 (q, *J* = 3.5 Hz), 123.00 (q, *J* = 275.0 Hz), 34.38, 32.84, 27.42, 22.030, 22.027. HRMS (ESI-TOF) Calcd for C<sub>13</sub>H<sub>15</sub>F<sub>3</sub>NO<sub>3</sub>S [M+H]<sup>+</sup>: 322.0719; found: 322.0715.

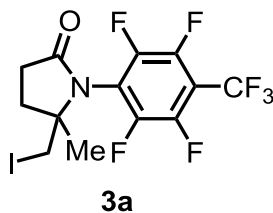

### 5-(Iodomethyl)-5-methyl-1-(2,3,5,6-tetrafluoro-4-(trifluoromethyl)phenyl)pyrrolidin-2-one (3a)

Substrate was treated with standard condition. After purification by preparative TLC (eluent: hexane/EtOAc = 5/1), compound was obtained as a white solid (37.7 mg, 83%). <sup>1</sup>H NMR (400 MHz, CDCl<sub>3</sub>) δ 3.43 (d, *J* = 10.2 Hz, 1H), 3.24 (d, *J* = 10.2 Hz, 1H), 2.77–2.60 (m, 2H), 2.50 (ddd, *J* = 13.2, 9.4, 5.5 Hz, 1H), 2.22 (ddd, *J* = 13.2, 9.5, 7.9 Hz, 1H), 1.52 (s, 3H). <sup>19</sup>F NMR (376 MHz, CDCl<sub>3</sub>) δ -56.69 (t, *J* = 21.7 Hz, 3F), -138.81 – -138.97 (m, 2F), -139.33 – -139.48 (m, 2F). <sup>13</sup>C NMR (150 MHz, CDCl<sub>3</sub>) δ 174.55, 65.70, 33.89, 29.77, 24.77, 12.87. HRMS (ESI-TOF) Calcd for C<sub>13</sub>H<sub>10</sub>F<sub>7</sub>INO [M+H]<sup>+</sup>: 455.9690; found: 455.9700.

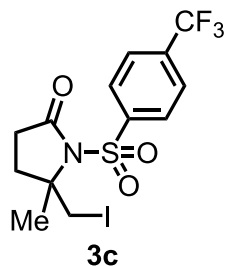

**5-(Iodomethyl)-5-methyl-1-((4-(trifluoromethyl)phenyl)sulfonyl)pyrrolidin-2-one (3c)**

Substrate was treated with standard condition. After purification by preparative TLC (eluent: hexane/EtOAc = 5/1), compound was obtained as a white solid (32.1 mg, 72%). <sup>1</sup>H NMR (400 MHz, CDCl<sub>3</sub>) δ 8.29 (d, *J* = 8.3 Hz, 2H), 7.81 (d, *J* = 8.3 Hz, 2H), 4.01 (d, *J* = 10.6 Hz, 1H), 3.73 (d, *J* = 10.6 Hz, 1H), 2.59 (ddd, *J* = 18.0, 10.2, 6.6 Hz, 1H), 2.46–2.37 (m, 1H), 2.30 (ddd, *J* = 13.2, 10.2, 6.6 Hz, 1H), 2.00 (ddd, *J* = 13.2, 10.1, 6.7 Hz, 1H), 1.92 (s, 3H). <sup>13</sup>C NMR (150 MHz, CDCl<sub>3</sub>) δ 173.82, 141.92, 135.51 (q, *J* = 33.6 Hz), 129.90, 125.75 (q, *J* = 3.6 Hz), 122.63 (q, *J* = 274.1 Hz), 68.35, 34.32, 29.68, 26.13, 16.20. HRMS (ESI-TOF) Calcd for C<sub>13</sub>H<sub>14</sub>F<sub>3</sub>INO<sub>3</sub>S [M+H]<sup>+</sup>: 447.9686; found:447.9690.

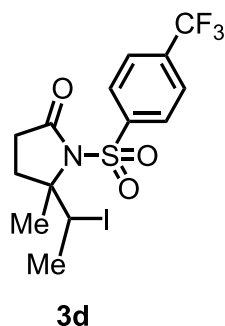

**5-(1-Iodoethyl)-5-methyl-1-((4-(trifluoromethyl)phenyl)sulfonyl)pyrrolidin-2-one (3d)**

Substrate was treated with standard condition. After purification by preparative TLC (eluent: hexane/EtOAc = 10/1), two diastereomers were obtained as white solids (15.0 mg, 10.6 mg, 3:2, 71% in total).

<sup>1</sup>H NMR (400 MHz, CDCl<sub>3</sub>) δ 8.22 (d, *J* = 8.3 Hz, 2H), 7.81 (d, *J* = 8.3 Hz, 2H), 5.14 (q, *J* = 7.0 Hz, 1H), 2.54–2.47 (m, 1H), 2.46–2.38 (m, 2H), 2.00 (d, *J* = 7.0 Hz, 3H), 1.97–1.92 (m, 4H). <sup>13</sup>C NMR (150 MHz, CDCl<sub>3</sub>) δ 174.49, 141.62, 135.58 (q, *J* = 34.1 Hz), 129.75, 125.88 (q, *J* = 3.7 Hz), 123.02 (q, *J* = 279.1 Hz), 72.58, 34.02, 30.73, 30.00, 29.10, 23.67. HRMS (ESI-TOF) Calcd for C<sub>14</sub>H<sub>16</sub>F<sub>3</sub>INO<sub>3</sub>S [M+H]<sup>+</sup>: 461.9842; found: 461.9848.



$^1\text{H}$  NMR (400 MHz,  $\text{CDCl}_3$ )  $\delta$  8.34 (d,  $J = 8.3$  Hz, 2H), 7.80 (d,  $J = 8.3$  Hz, 2H), 5.38 (q,  $J = 7.1$  Hz, 1H), 2.72 – 2.62 (m, 1H), 2.49–2.41 (m, 2H), 2.17 (s, 3H), 1.97 (d,  $J = 7.1$  Hz, 3H), 1.94–1.91 (m, 1H).  $^{13}\text{C}$  NMR (150 MHz,  $\text{CDCl}_3$ )  $\delta$  173.78, 141.68, 135.44 (q,  $J = 34.1$  Hz), 130.42, 125.49 (q,  $J = 3.5$  Hz), 123.12 (q,  $J = 279.4$  Hz), 73.30, 38.00, 30.63, 29.90, 24.07, 23.87. HRMS (ESI-TOF) Calcd for  $\text{C}_{14}\text{H}_{16}\text{F}_3\text{INO}_3\text{S}$   $[\text{M}+\text{H}]^+$ : 461.9842; found: 461.9844

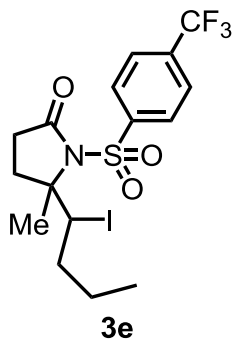

**5-(1-Iodobutyl)-5-methyl-1-((4-(trifluoromethyl)phenyl)sulfonyl)pyrrolidin-2-one (3e)**

Substrate was treated with standard condition. After purification by preparative TLC (eluent: hexane/EtOAc = 10/1), two diastereomers were obtained as white solids (14.0 mg, 12.0 mg, 7:6, 53% in total).

$^1\text{H}$  NMR (400 MHz,  $\text{CDCl}_3$ )  $\delta$  8.22 (d,  $J = 8.3$  Hz, 2H), 7.81 (d,  $J = 8.3$  Hz, 2H), 4.97–4.93 (m, 1H), 2.55–2.48 (m, 1H), 2.44–2.39 (m, 2H), 2.02–1.97 (m, 1H), 1.95 (s, 3H), 1.78–1.67 (m, 3H), 1.49–1.41 (m, 1H), 0.98 (t,  $J = 7.1$  Hz, 3H).  $^{13}\text{C}$  NMR (150 MHz,  $\text{CDCl}_3$ )  $\delta$  174.70, 141.81, 135.59 (q,  $J = 32.8$  Hz), 129.69, 125.87 (q,  $J = 3.7$  Hz), 123.02 (q,  $J = 282.0$  Hz), 72.65, 44.84, 36.25, 31.16, 29.90, 29.59, 23.12, 13.05. HRMS (ESI-TOF) Calcd for  $\text{C}_{16}\text{H}_{20}\text{F}_3\text{INO}_3\text{S}$   $[\text{M}+\text{H}]^+$ : 490.0155; found:490.0159.

$^1\text{H}$  NMR (400 MHz,  $\text{CDCl}_3$ )  $\delta$  8.33 (d,  $J = 8.3$  Hz, 2H), 7.79 (d,  $J = 8.3$  Hz, 2H), 5.21–5.18 (m, 1H), 2.71–2.50 (m, 1H), 2.48–2.38 (m, 2H), 1.94 (s, 3H), 1.93–1.89 (m, 1H), 1.80–1.69 (m, 3H), 1.51–1.46 (m, 1H), 1.01 (t,  $J = 7.2$  Hz, 3H).  $^{13}\text{C}$  NMR (150 MHz,  $\text{CDCl}_3$ )  $\delta$  173.89, 141.72, 135.43 (q,  $J = 33.1$  Hz), 130.49, 125.44 (q,  $J = 3.6$  Hz), 123.14 (q,  $J = 275.0$  Hz), 73.24, 49.34, 36.69, 31.15, 29.97, 25.13, 24.18, 13.25. HRMS (ESI-TOF) Calcd for  $\text{C}_{16}\text{H}_{20}\text{F}_3\text{INO}_3\text{S}$   $[\text{M}+\text{H}]^+$ : 490.0155; found:490.0148.

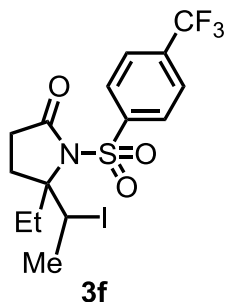

**5-Ethyl-5-(1-iodoethyl)-1-((4-(trifluoromethyl)phenyl)sulfonyl)pyrrolidin-2-one (3f)**

Substrate was treated with standard condition. After purification by preparative TLC (eluent: hexane/EtOAc = 5/1), compound was obtained as a white solid (29.9 mg, 63%). <sup>1</sup>H NMR (400 MHz, CDCl<sub>3</sub>) δ 8.27 (d, *J* = 8.0 Hz, 2H), 7.81 (d, *J* = 8.0 Hz, 2H), 5.11 (q, *J* = 7.0 Hz, 1H), 2.46–2.32 (m, 5H), 2.08–1.99 (m, 1H), 1.96 (d, *J* = 7.1 Hz, 3H), 0.83 (t, *J* = 7.3 Hz, 3H). <sup>13</sup>C NMR (150 MHz, CDCl<sub>3</sub>) δ 175.12, 141.03, 135.69 (q, *J* = 33.1 Hz), 130.16, 125.69 (q, *J* = 3.0 Hz), 123.00 (q, *J* = 285.0 Hz), 76.39, 34.68, 33.16, 30.49, 27.31, 23.63, 8.97. HRMS (ESI-TOF) Calcd for C<sub>15</sub>H<sub>18</sub>F<sub>3</sub>INO<sub>3</sub>S [M+H]<sup>+</sup>: 475.9999; found:475.9994.

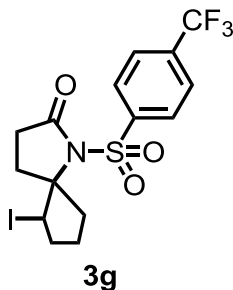

**(5*R*,6*R*)-6-Iodo-1-((4-(trifluoromethyl)phenyl)sulfonyl)-1-azaspiro[4.4]nonan-2-one (3g)**

Substrate was treated with standard condition. After purification by preparative TLC (eluent: hexane/EtOAc = 5/1), compound was obtained as a white solid (22.7 mg, 48%). <sup>1</sup>H NMR (400 MHz, CDCl<sub>3</sub>) δ 8.29 (d, *J* = 8.3 Hz, 2H), 7.81 (d, *J* = 8.3 Hz, 2H), 5.25 (dd, *J* = 11.4, 8.0 Hz, 1H), 2.87–2.79 (m, 1H), 2.71–2.64 (m, 1H), 2.48–2.39 (m, 3H), 2.11–1.88 (m, 4H), 1.84–1.77 (m, 1H). <sup>13</sup>C NMR (150 MHz, CDCl<sub>3</sub>) δ 174.32, 141.85, 135.45 (q, *J* = 34.0 Hz), 129.92, 125.71 (q, *J* = 3.4 Hz), 122.61 (q, *J* = 283.0 Hz), 76.79, 33.82, 33.08, 33.07, 32.82, 29.45, 21.10. HRMS (ESI-TOF) Calcd for C<sub>15</sub>H<sub>16</sub>F<sub>3</sub>INO<sub>3</sub>S [M+H]<sup>+</sup>: 473.9842; found: 473.9842.

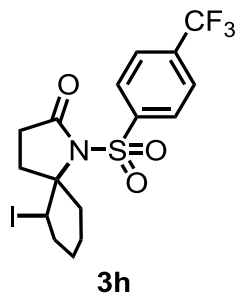

**(5*R*,6*R*)-6-Iodo-1-((4-(trifluoromethyl)phenyl)sulfonyl)-1-azaspiro[4.5]decan-2-one (3h)**

Substrate was treated with standard condition. After purification by preparative TLC (eluent: hexane/EtOAc = 5/1), compound was obtained as a white solid (34.2 mg, 70%). <sup>1</sup>H NMR (400 MHz, CDCl<sub>3</sub>) δ 8.34 (d, *J* = 8.3 Hz, 2H), 7.79 (d, *J* = 8.3 Hz, 2H), 5.41 (dd, *J* = 12.8, 4.3 Hz, 1H), 2.84 (td, *J* = 12.6, 4.2 Hz, 1H), 2.71-2.62 (m, 1H), 2.58-2.54 (m, 1H), 2.44-2.36 (m, 2H), 2.18-2.03 (m, 4H), 1.92 (d, *J* = 10.0 Hz, 1H), 1.54-1.46 (m, 2H). <sup>13</sup>C NMR (150 MHz, CDCl<sub>3</sub>) δ 173.55, 141.41, 135.42 (q, *J* = 35.1 Hz), 129.95, 125.03 (q, *J* = 3.7 Hz), 122.69 (q, *J* = 279.8 Hz), 73.73, 40.23, 36.99, 36.17, 29.41, 28.22, 27.40, 22.30. HRMS (ESI-TOF) Calcd for C<sub>16</sub>H<sub>18</sub>F<sub>3</sub>INO<sub>3</sub>S [M+H]<sup>+</sup>: 487.9999; found: 488.0006.

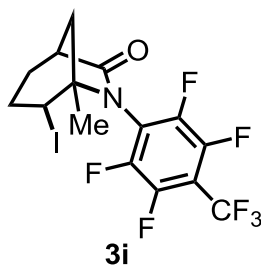

**(1*S*,4*R*,5*R*)-4-Iodo-5-methyl-6-(2,3,5,6-tetrafluoro-4-(trifluoromethyl)phenyl)-6-azabicyclo[3.2.1]octan-7-one (3i)**

Substrate was treated with standard condition. After purification by preparative TLC (eluent: hexane/EtOAc = 5/1), compound was obtained as a white solid (34.7 mg, 72%). <sup>1</sup>H NMR (400 MHz, CDCl<sub>3</sub>) δ 4.65 (d, *J* = 5.3 Hz, 1H), 2.91 (d, *J* = 11.7 Hz, 1H), 2.84-2.82 (m, 1H), 2.70-2.64 (m, 1H), 2.29 (dd, *J* = 16.3, 5.3 Hz, 1H), 2.24-2.21 (m, 1H), 2.03-1.97 (m, 1H), 1.93-1.88 (m, 1H), 1.38 (s, 3H). <sup>19</sup>F NMR (376 MHz, CDCl<sub>3</sub>) δ -56.62 (t, *J* = 21.7 Hz, 3F), -139.22 - -139.36 (m, 2F), -139.93 - -140.07 (m, 1F), -142.29 (dd, *J* = 22.6, 7.9 Hz, 1F). <sup>13</sup>C NMR (150 MHz, CDCl<sub>3</sub>) δ 175.78, 67.70, 41.85, 41.26, 33.25, 31.58, 23.54, 21.02. HRMS (ESI-TOF) Calcd for C<sub>15</sub>H<sub>10</sub>F<sub>7</sub>INO [M-H]<sup>-</sup>: 479.9701; found: 479.9693.

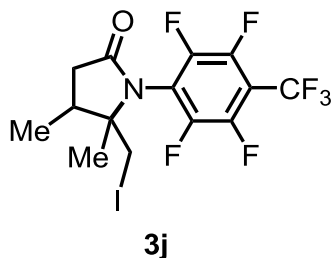

**(5S)-5-(Iodomethyl)-4,5-dimethyl-1-(2,3,5,6-tetrafluoro-4-(trifluoromethyl)phenyl)pyrrolidin-2-one (3j)**

Substrate was treated with standard condition. After purification by preparative TLC (eluent: hexane/EtOAc = 5/1), a mixture of inseparable diastereomers was obtained as a colorless oil (28.7 mg, 3:2, 61%). <sup>1</sup>H NMR (400 MHz, CDCl<sub>3</sub>) δ 3.49-3.32 (m, 1H), 3.32-3.20 (m, 1H), 2.91–2.80 (m, 1H), 2.80–2.60 (m, 1H), 2.60-2.27 (m, 1H), 2.55–2.30 (m, 3H), 1.39-1.21 (m, 3H). <sup>19</sup>F NMR (376 MHz, CDCl<sub>3</sub>) δ -56.59 – -56.72 (m, 3F), -138.77 – -138.88 (m, 1F), -139.19 – -140.24 (m, 3F). <sup>13</sup>C NMR (150 MHz, CDCl<sub>3</sub>) δ 173.81, 173.19, 67.00, 66.58, 39.56, 39.19, 37.51, 37.18, 25.24, 19.80, 15.61, 14.60, 12.78, 7.91. HRMS (ESI-TOF) Calcd for C<sub>14</sub>H<sub>12</sub>F<sub>7</sub>INO [M+H]<sup>+</sup>: 469.9846; found: 469.9845

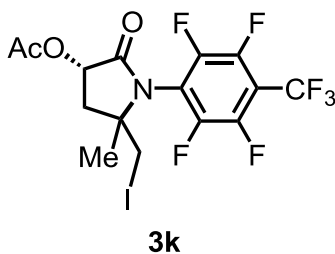

**(3S,5S)-5-(Iodomethyl)-5-methyl-2-oxo-1-(2,3,5,6-tetrafluoro-4-(trifluoromethyl)phenyl)pyrrolidin-3-yl acetate (3k)**

Substrate was treated with standard condition. After purification by preparative TLC (eluent: hexane/EtOAc = 5/1), a mixture of inseparable mixture of diastereomers was obtained as a white solid (31.8 mg, 3:2, 62%). <sup>1</sup>H NMR (400 MHz, CDCl<sub>3</sub>) δ 5.75–5.52 (m, 1H), 3.52–3.40 (m, 1H), 3.12–3.06 (m, 1H), 2.78-2.72 (m, 1H), 2.40-2.35 (m, 1H), 2.22-2.18 (m, 3H), 1.59-1.58 (m, 3H). <sup>19</sup>F NMR (376 MHz, CDCl<sub>3</sub>) δ -56.62 – -56.75 (m, 3F), -138.42 – -138.94 (m, 4F). <sup>13</sup>C NMR (150 MHz, CDCl<sub>3</sub>) δ 170.19, 169.83, 69.36, 69.04, 63.76, 63.50, 41.25, 40.57, 25.91, 24.83, 20.72, 13.04, 12.52. HRMS (ESI-TOF) Calcd for C<sub>15</sub>H<sub>12</sub>F<sub>7</sub>INO<sub>3</sub> [M+H]<sup>+</sup>: 513.9745; found: 513.9740

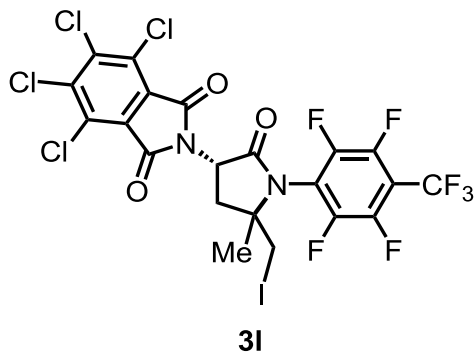

**4,5,6,7-Tetrachloro-2-((3*S*,5*S*)-5-(iodomethyl)-5-methyl-2-oxo-1-(2,3,5,6-tetrafluoro-4-(trifluoromethyl)phenyl)pyrrolidin-3-yl)isoindoline-1,3-dione (3l)**

One-pot procedure: to an oven dried microwave tube (5 mL) equipped with a magnetic stir bar was added substrate (0.1 mmol), NIS (34.6 mg, 0.2 mmol) and 1 mL of DCE was added. The mixture was covered with safety shield, then was heated to 100 °C for 8 hours under vigorous stirring. The reaction mixture was then cooled to room temperature. I<sub>2</sub> (76.2 mg, 0.3 mmol) and TMSN<sub>3</sub> (53 uL, 0.4 mmol) was added. The mixture was covered with safety shield, then was heated to 100 °C for 14 hours under vigorous stirring. After workup as described in general procedures, a mixture of inseparable diastereomers was obtained as a yellow solid (53.0 mg, 2:1, 72%). <sup>1</sup>H NMR (400 MHz, CDCl<sub>3</sub>) δ 5.47-5.25 (m, 1H), 3.70–3.52 (m, 1H), 3.40-3.31 (m, 1H), 3.03-2.67 (m, 2H), 1.70-1.69 (m, 3H). <sup>19</sup>F NMR (376 MHz, CDCl<sub>3</sub>) δ -56.62 – -56.75 (m, 3F), -136.37 – -137.63 (m, 1F), -138.54 – -139.01 (m, 3F). <sup>13</sup>C NMR (150 MHz, CDCl<sub>3</sub>) δ 168.82, 162.38, 140.74, 130.19, 127.23, 63.72, 63.05, 49.17, 49.10, 38.66, 37.26, 25.72, 24.70, 13.21, 12.29. HRMS (ESI-TOF) Calcd for C<sub>21</sub>H<sub>9</sub>Cl<sub>4</sub>F<sub>7</sub>IN<sub>2</sub>O<sub>3</sub> [M+H]<sup>+</sup>: 736.8295; found:736.8292

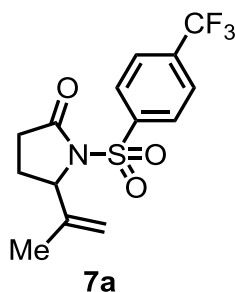

**5-(Prop-1-en-2-yl)-1-((4-(trifluoromethyl)phenyl)sulfonyl)pyrrolidin-2-one (7a)**

Substrate was treated with standard condition. After purification by preparative TLC (eluent: hexane/EtOAc = 5/1), compound was obtained as a white solid (23.7 mg, 71%). <sup>1</sup>H NMR (400 MHz, CDCl<sub>3</sub>) δ 8.20 (d, *J* = 8.2 Hz, 2H), 7.79 (d, *J* = 8.3 Hz, 2H), 4.92 (d, *J* = 26.9 Hz, 2H), 4.86 (d, *J* = 8.5 Hz, 1H), 2.62–2.51 (m, 1H), 2.46–2.29 (m, 2H), 1.92–1.86 (m, 1H), 1.66 (s, 3H). <sup>13</sup>C NMR (150 MHz, CDCl<sub>3</sub>)

$\delta$  173.11, 142.03, 141.29, 135.00 (q,  $J = 32.4$  Hz), 128.76, 125.35 (q,  $J = 3.9$  Hz), 120.83 (q,  $J = 289.0$  Hz), 113.05, 63.88, 30.10, 24.12, 18.07. HRMS (ESI-TOF) Calcd for  $C_{14}H_{15}F_3NO_3S$   $[M+H]^+$ : 334.0719; found:334.0717.

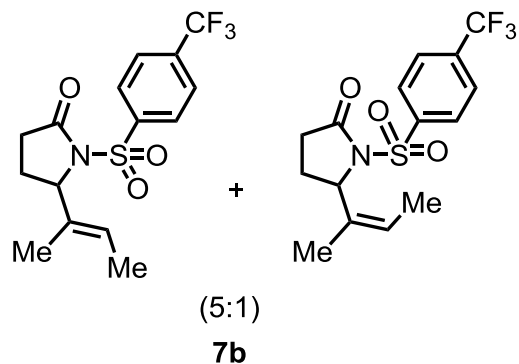

**(E)-5-(But-2-en-2-yl)-1-((4-(trifluoromethyl)phenyl)sulfonyl)pyrrolidin-2-one (7b)**

Substrate was treated with standard condition. After purification by preparative TLC (eluent: hexane/EtOAc = 5/1), a mixture of inseparable region isomers was obtained as a colorless oil (20.2 mg, 5:1, 58%).  $^1H$  NMR (400 MHz,  $CDCl_3$ )  $\delta$  8.15 (m, 2H), 7.78 (d,  $J = 8.3$  Hz, 2H), 5.45 (q,  $J = 6.8$  Hz, 1H), 4.84 (d,  $J = 9.0$  Hz, 1H), 2.57–2.42 (m, 2H), 2.41–2.30 (m, 1H), 1.86–1.80 (m, 1H), 1.59 (d,  $J = 6.8$  Hz, 3H), 1.37–1.26 (m, 3H).  $^{13}C$  NMR (150 MHz,  $CDCl_3$ ) Major isomer  $\delta$  173.70, 141.93, 135.32 (q,  $J = 34.8$  Hz), 132.95, 129.07, 125.76 (q,  $J = 3.7$  Hz), 123.18 (q,  $J = 273.0$  Hz), 120.38, 66.13, 30.92, 24.29, 13.09, 11.82. HRMS (ESI-TOF) Calcd for  $C_{15}H_{17}F_3NO_3S$   $[M+H]^+$ : 348.0876; found:348.0876.

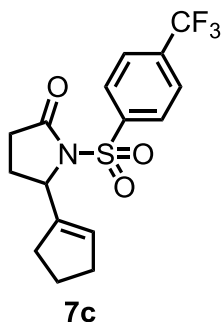

**5-(Cyclopent-1-en-1-yl)-1-((4-(trifluoromethyl)phenyl)sulfonyl)pyrrolidin-2-one (7c)**

Substrate was treated with standard condition. After purification by preparative TLC (eluent: hexane/EtOAc = 5/1), compound was obtained as a colorless oil (15.8 mg, 44%).  $^1H$  NMR (400 MHz,  $CDCl_3$ )  $\delta$  8.16 (d,  $J = 8.2$  Hz, 2H), 7.78 (d,  $J = 8.3$  Hz, 2H), 5.67 (s, 1H), 5.13 (d,  $J = 8.4$  Hz, 1H), 2.57–2.52 (m, 1H), 2.48–2.43 (m, 1H), 2.37–2.31 (m, 2H), 2.22–2.17 (m, 1H), 1.92–1.86 (m, 2H), 1.82–1.77 (m, 1H), 1.68–1.63 (m, 2H).  $^{13}C$  NMR (150 MHz,  $CDCl_3$ )  $\delta$  173.35, 142.01, 141.43, 135.36 (q,  $J = 33.0$

Hz), 129.98, 129.04, 125.76 (q,  $J = 3.6$  Hz), 123.00 (q,  $J = 279.8$  Hz), 120.38, 60.11, 32.01, 31.00, 29.69, 24.49, 23.07. HRMS (ESI-TOF) Calcd for  $C_{16}H_{17}F_3NO_3S$   $[M+H]^+$ : 360.0876; found:360.0877.

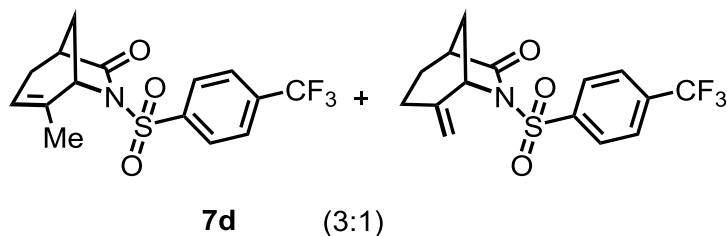

**(5R)-4-Methyl-6-((4-(trifluoromethyl)phenyl)sulfonyl)-6-azabicyclo[3.2.1]oct-3-en-7-one (7d)**

Substrate was treated with standard condition. After purification by preparative TLC (eluent: hexane/EtOAc = 5/1), a mixture of inseparable region isomers was obtained as a colorless oil (18.7 mg, 3:1, 54%).  $^1H$  NMR (400 MHz,  $CDCl_3$ )  $\delta$  8.19–8.14 (m, 2H), 7.79–7.77 (d,  $J = 8.2$  Hz, 2H), 5.30–5.10 (m, 1H), 4.94–4.47 (m, 1H), 2.80–2.67 (m, 1H), 2.53–2.35 (m, 2H), 2.26–2.18 (m, 1H), 1.98 (m, 1H), 1.99–1.93 (m, 3H).  $^{13}C$  NMR (150 MHz,  $CDCl_3$ )  $\delta$  175.53, 174.91, 142.28 (q,  $J = 42.0$  Hz), 137.95, 135.22 (q,  $J = 32.8$  Hz), 128.84, 128.58, 125.94 (q,  $J = 3.5$  Hz), 125.92 (q,  $J = 3.3$  Hz), 122.13 (d,  $J = 286.0$  Hz), 112.00, 64.51, 59.64, 41.72, 40.53, 36.95, 33.44, 27.84, 27.17, 26.31, 21.88. HRMS (ESI-TOF) Calcd for  $C_{15}H_{15}F_3NO_3S$   $[M+H]^+$ : 346.0719; found:346.0721

**2.4 Procedure for Ring Opening of Lactams**

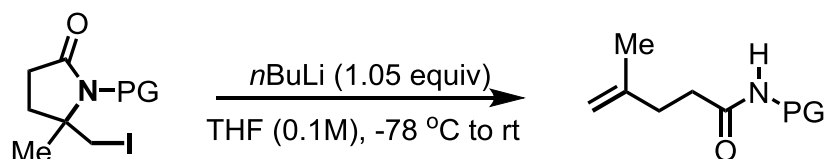

To an oven dried microwave tube (5 mL) equipped with a magnetic stir bar was added substrate (0.1 mmol) and 1 mL of THF. After frozen with a dry ice/acetone bath, the mixture was treated with *n*BuLi (1.05 equiv, 1.6 M in hexane) slowly. The microwave tube was kept in dry ice/acetone bath for 30 min, then was warmed to room temperature. The reaction mixture was diluted with 5 mL ether and quenched with 5 mL saturated ammonium chloride solution. Aqueous phase was extracted with 5 mL ether twice. Combined organic phases are directly dried with  $Na_2SO_4$ . The solvents were removed under reduced pressure and the resulting mixture was purified by preparative TLC using hexane/EtOAc (20/1) as the eluent.

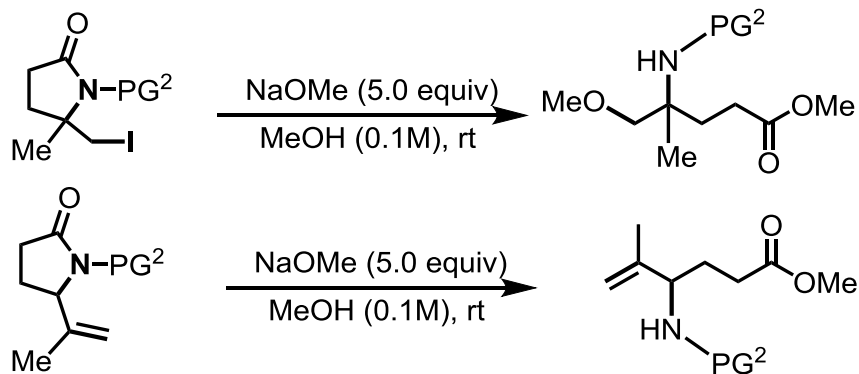

To an oven dried microwave tube (5 mL) equipped with a magnetic stir bar was added substrate (0.1 mmol) and 1 mL of methanol. The mixture was then treated with NaOMe (5.0 equiv, 5.4 M in methanol) slowly. After two hours, reaction mixture was quenched with 5 mL saturated ammonium chloride solution. Aqueous phase was extracted with 10 mL ethyl acetate three times. Combined organic phases were dried with Na<sub>2</sub>SO<sub>4</sub>. The solvents were removed under reduced pressure and the resulting mixture was purified by preparative TLC using hexane/EtOAc (10/1) as the eluent.

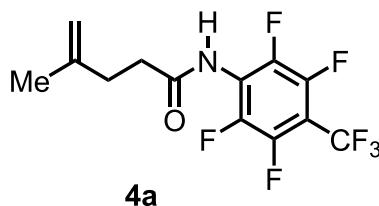

#### 4-Methyl-N-(2,3,5,6-tetrafluoro-4-(trifluoromethyl)phenyl)pent-4-enamide (4a)

Substrate was treated with standard condition. After purification by preparative TLC (eluent: hexane/EtOAc = 10/1), compound was obtained as a white solid (29.8 mg, 91%). <sup>1</sup>H NMR (400 MHz, CDCl<sub>3</sub>) δ 7.24 (s, 1H), 4.85 (s, 1H), 4.79 (s, 1H), 2.65 (t, *J* = 7.5 Hz, 2H), 2.46 (t, *J* = 7.5 Hz, 2H), 1.79 (s, 3H). <sup>13</sup>C NMR (150 MHz, CDCl<sub>3</sub>) δ 170.26, 143.68, 111.40, 34.42, 32.75, 22.36. HRMS (ESI-TOF) Calcd for C<sub>13</sub>H<sub>11</sub>F<sub>7</sub>NO [M+H]<sup>+</sup>: 330.0723; found: 330.0729.

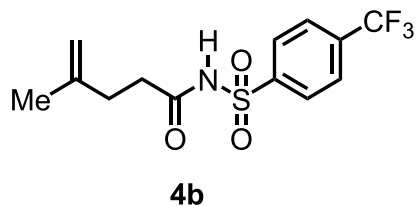

#### 4-Methyl-N-((4-(trifluoromethyl)phenyl)sulfonyl)pent-4-enamide (4b)



Substrate was treated with standard condition. After purification by preparative TLC (eluent: hexane/EtOAc = 10/1), compound was obtained as a white solid (29.9 mg, 93%). <sup>1</sup>H NMR (400 MHz, CDCl<sub>3</sub>) δ 8.21 (d, *J* = 8.5 Hz, 2H), 7.82 (d, *J* = 8.5 Hz, 2H), 4.74 (s, 1H), 4.61 (s, 1H), 2.42 (t, *J* = 7.5 Hz, 2H), 2.28 (t, *J* = 7.5 Hz, 2H), 1.68 (s, 3H). <sup>13</sup>C NMR (150 MHz, CDCl<sub>3</sub>) δ 169.84, 143.09, 141.83, 135.63 (q, *J* = 33.6 Hz), 129.10, 126.15 (q, *J* = 3.1 Hz), 123.25 (q, *J* = 294.0 Hz), 111.42, 34.56, 31.76, 22.33. HRMS (ESI-TOF) Calcd for C<sub>13</sub>H<sub>15</sub>F<sub>3</sub>NO<sub>3</sub>S [M+H]<sup>+</sup>: 322.0719; found: 322.0719.

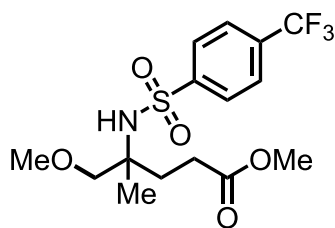

5

#### Methyl 5-methoxy-4-methyl-4-((4-(trifluoromethyl)phenyl)sulfonamido)pentanoate (5)

Substrate was treated with standard condition. After purification by preparative TLC (eluent: hexane/EtOAc = 5/1), compound was obtained as a colorless oil (31.4 mg, 82%). <sup>1</sup>H NMR (400 MHz, CDCl<sub>3</sub>) δ 8.02 (d, *J* = 8.2 Hz, 2H), 7.76 (d, *J* = 8.3 Hz, 2H), 5.23 (s, 1H), 3.67 (s, 3H), 3.19 (s, 3H), 3.17–3.09 (m, 2H), 2.42–2.33 (m, 2H), 2.03–1.97 (m, 1H), 1.85 (ddd, *J* = 14.8, 9.1, 6.3 Hz, 1H), 1.15 (s, 3H). <sup>13</sup>C NMR (150 MHz, CDCl<sub>3</sub>) δ 173.83, 146.61, 134.02 (q, *J* = 32.0 Hz), 127.46, 126.04 (q, *J* = 3.4 Hz), 123.24 (q, *J* = 279.0 Hz), 78.03, 58.90, 58.80, 51.79, 33.29, 28.64, 21.30. HRMS (ESI-TOF) Calcd for C<sub>15</sub>H<sub>19</sub>F<sub>3</sub>NO<sub>5</sub>S [M-H]<sup>-</sup>: 382.0942; found: 382.0946.

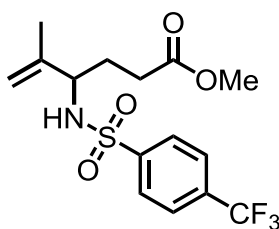

8

#### Methyl 5-methyl-4-((4-(trifluoromethyl)phenyl)sulfonamido)hex-5-enoate (8)

Substrate was treated with standard condition. After purification by preparative TLC (eluent: hexane/EtOAc = 5/1), compound was obtained as a colorless oil (32.1 mg, 88%). <sup>1</sup>H NMR (400 MHz, CDCl<sub>3</sub>) δ 7.97 (d, *J* = 8.2 Hz, 2H), 7.74 (d, *J* = 8.2 Hz, 2H), 5.20–5.19 (m, 1H), 4.75–4.72 (m, 2H), 3.87 (q, *J* = 7.5 Hz, 1H), 3.67 (s, 3H), 2.36–2.32 (m, 2H), 1.86–1.49 (m, 2H), 1.49 (d, *J* = 1.5 Hz, 3H). <sup>13</sup>C NMR (150 MHz, CDCl<sub>3</sub>) δ 173.75, 144.43, 142.38, 134.16 (q, *J* = 33.9 Hz), 127.62, 125.94 (q, *J* = 4.0

Hz), 123.22 (q,  $J = 269.6$  Hz), 114.04, 59.42, 51.87, 30.23, 28.58, 17.54. HRMS (ESI-TOF) Calcd for  $C_{15}H_{17}F_3NO_4S$  [M-H]<sup>-</sup>: 364.0836; found: 364.0841.

### 3 Reference

1. Yates, M.; Kallman, N.; Ley, C.; Wei, J. *Org. Process Res. Dev.*, **2009**, *13*, 255.

## 4 NMR Spectra of New Compounds

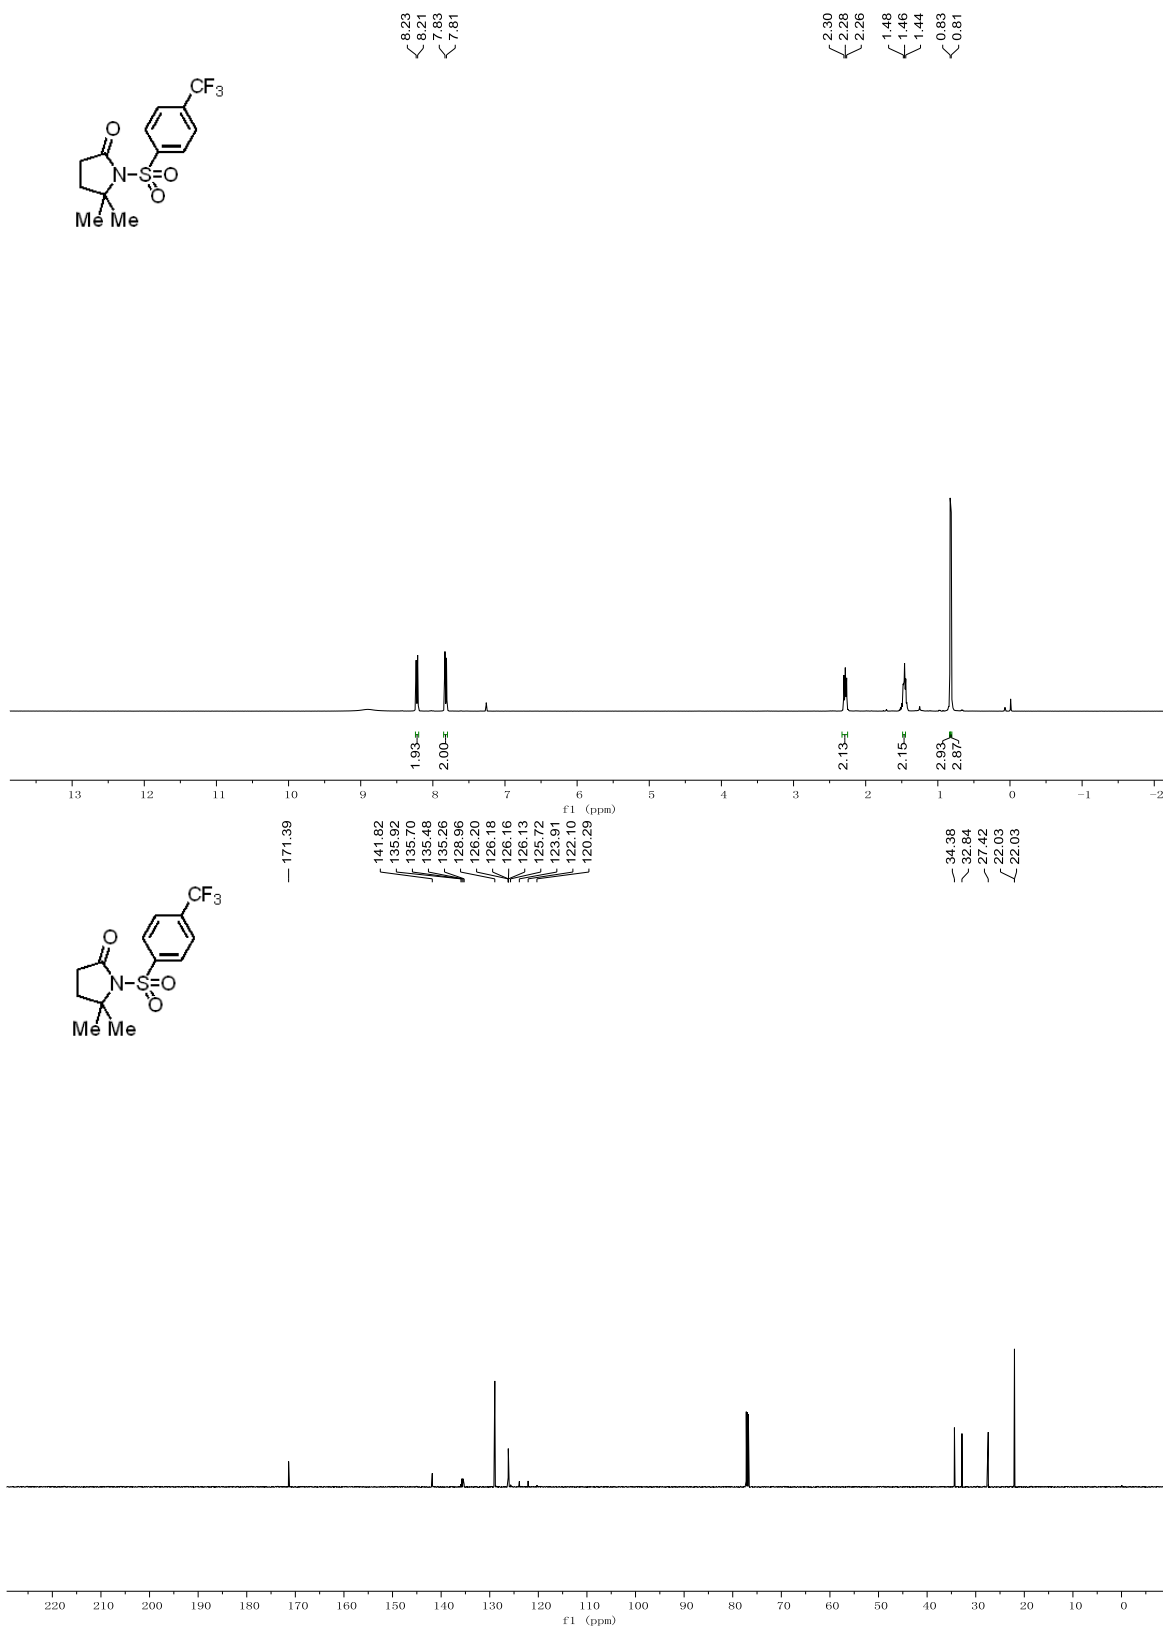



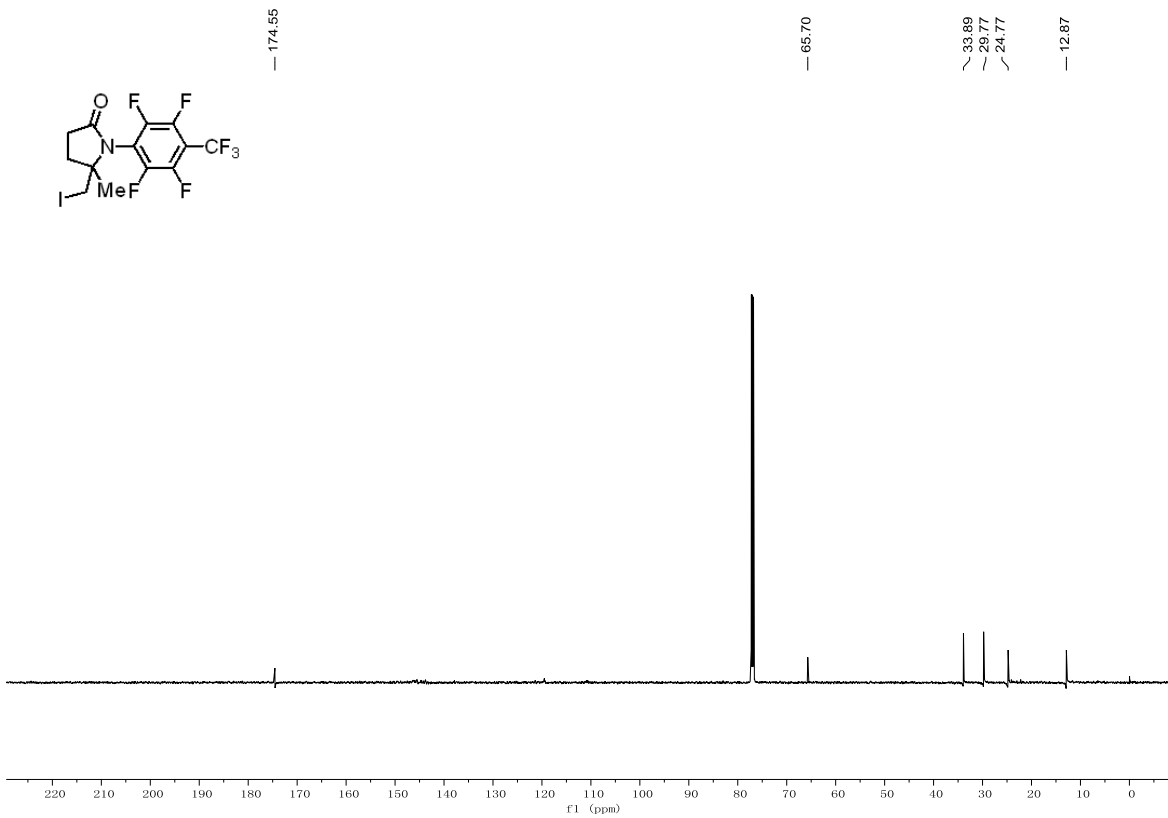

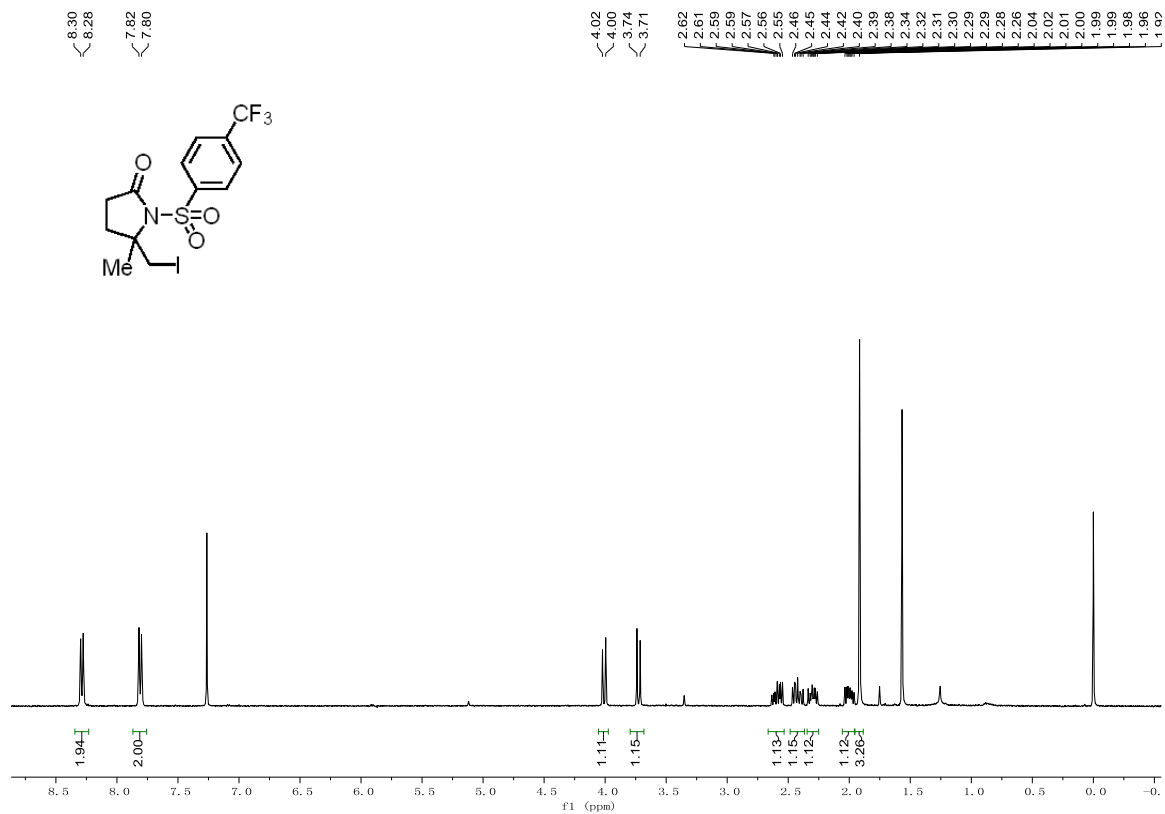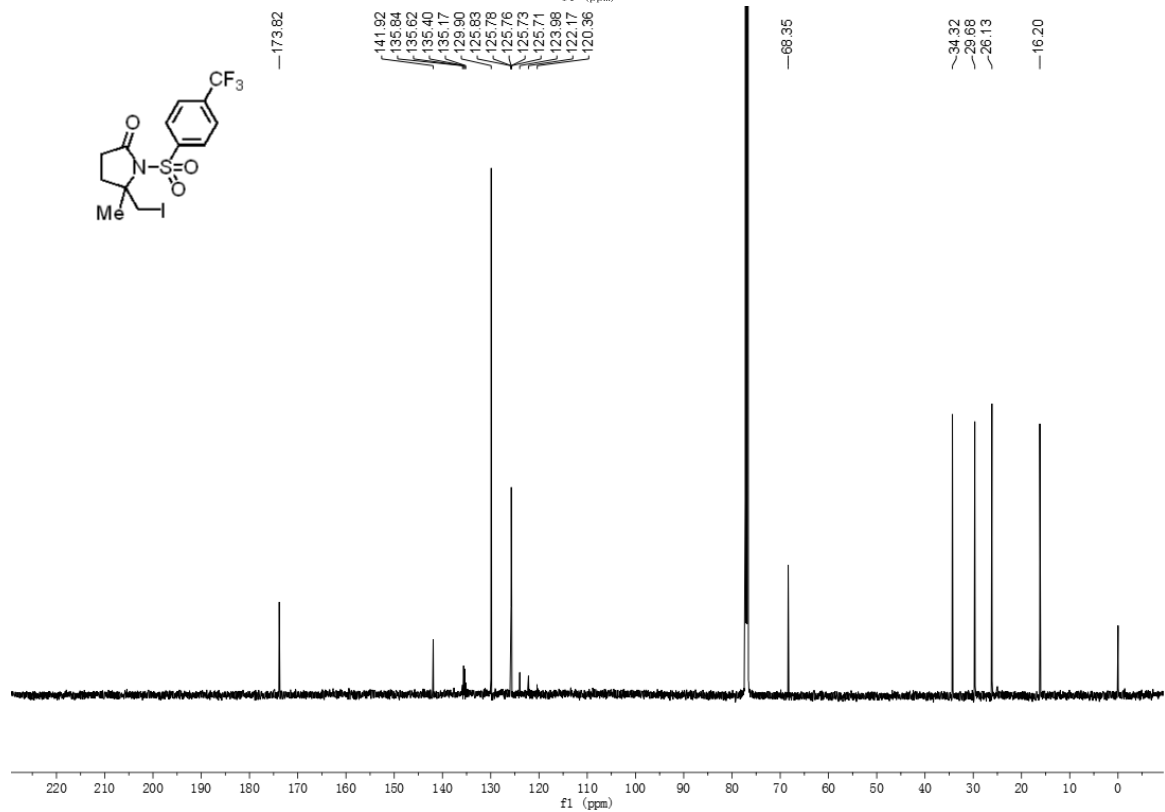

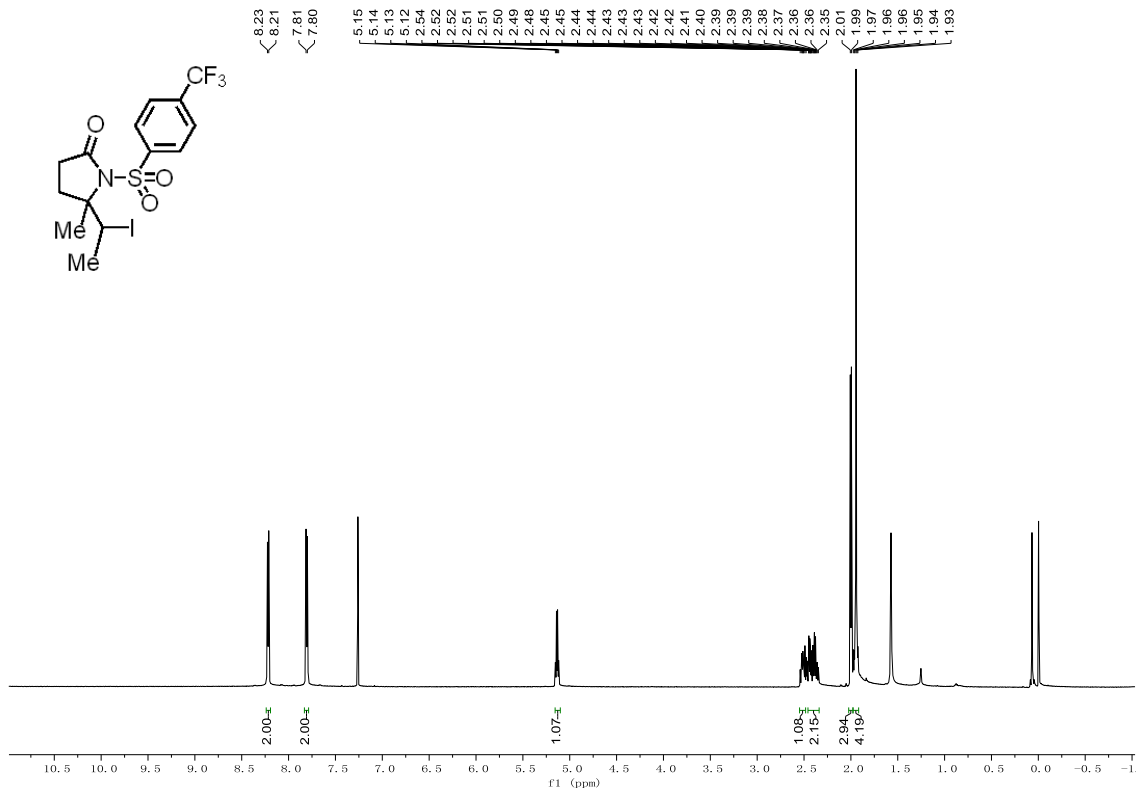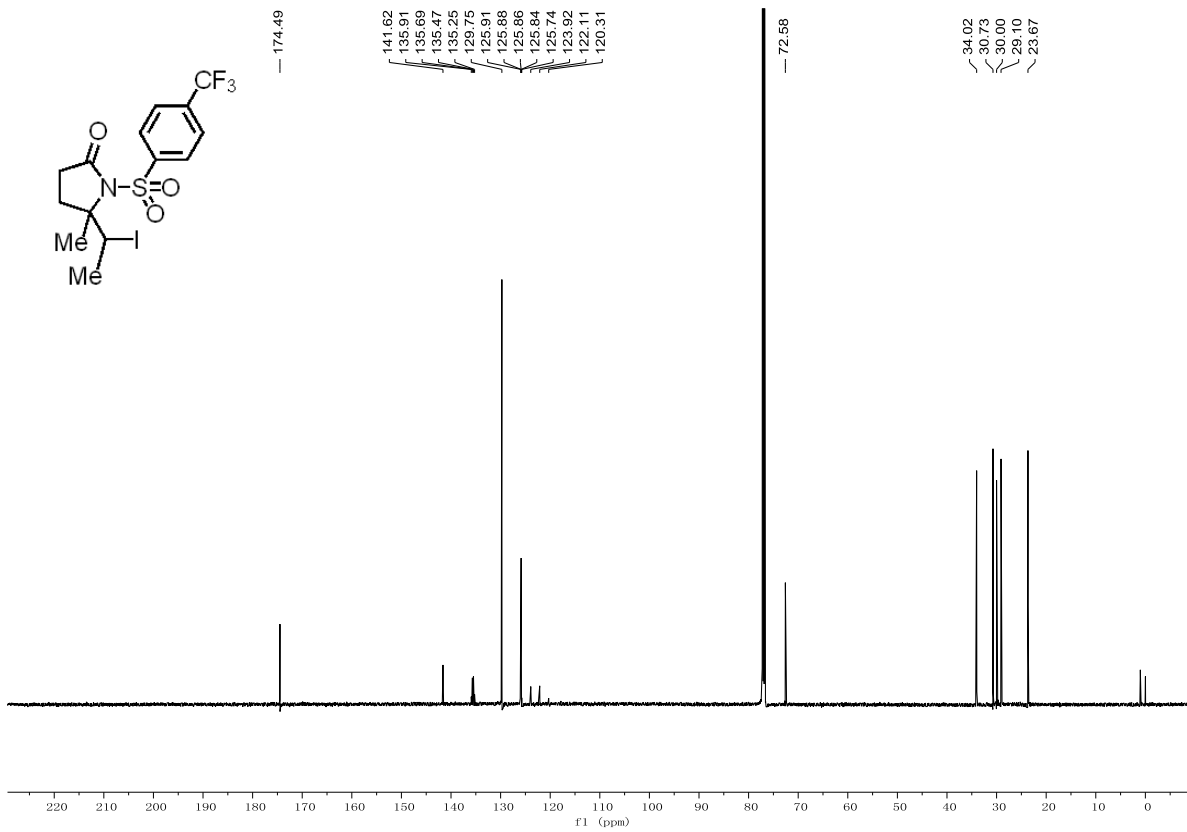

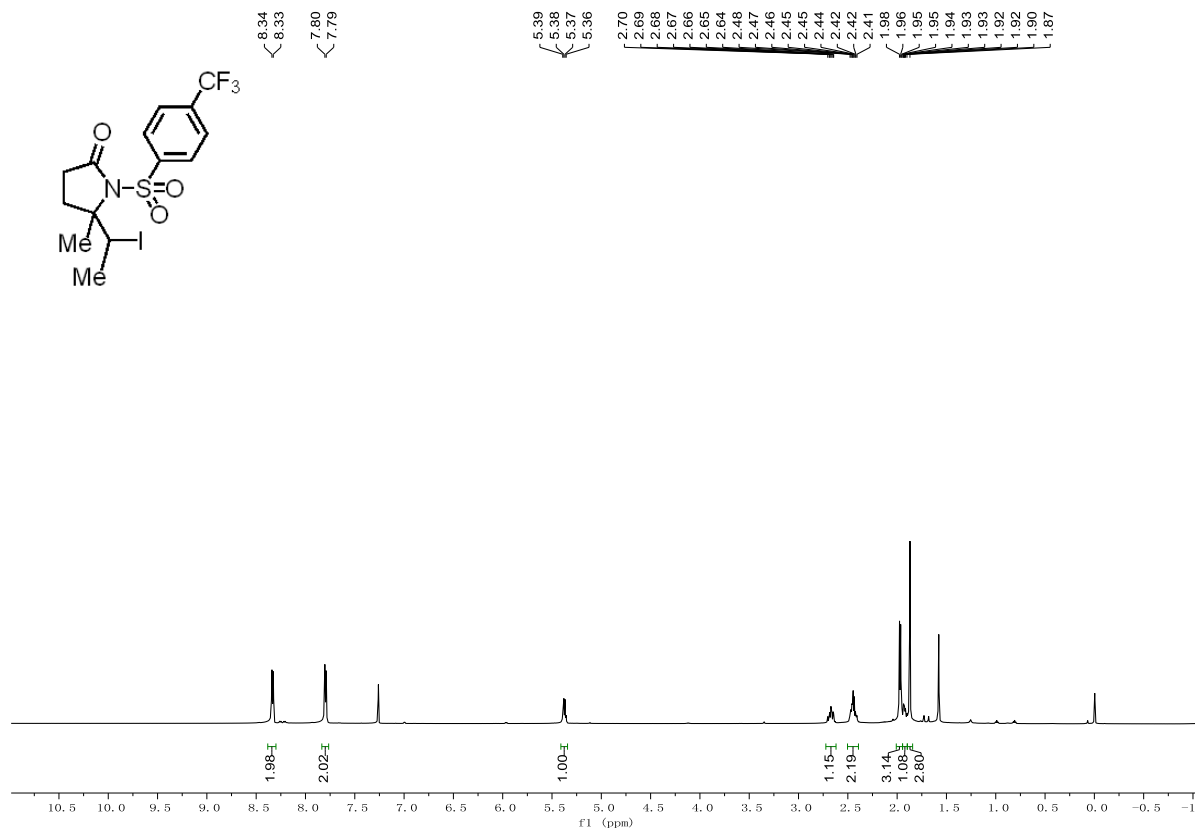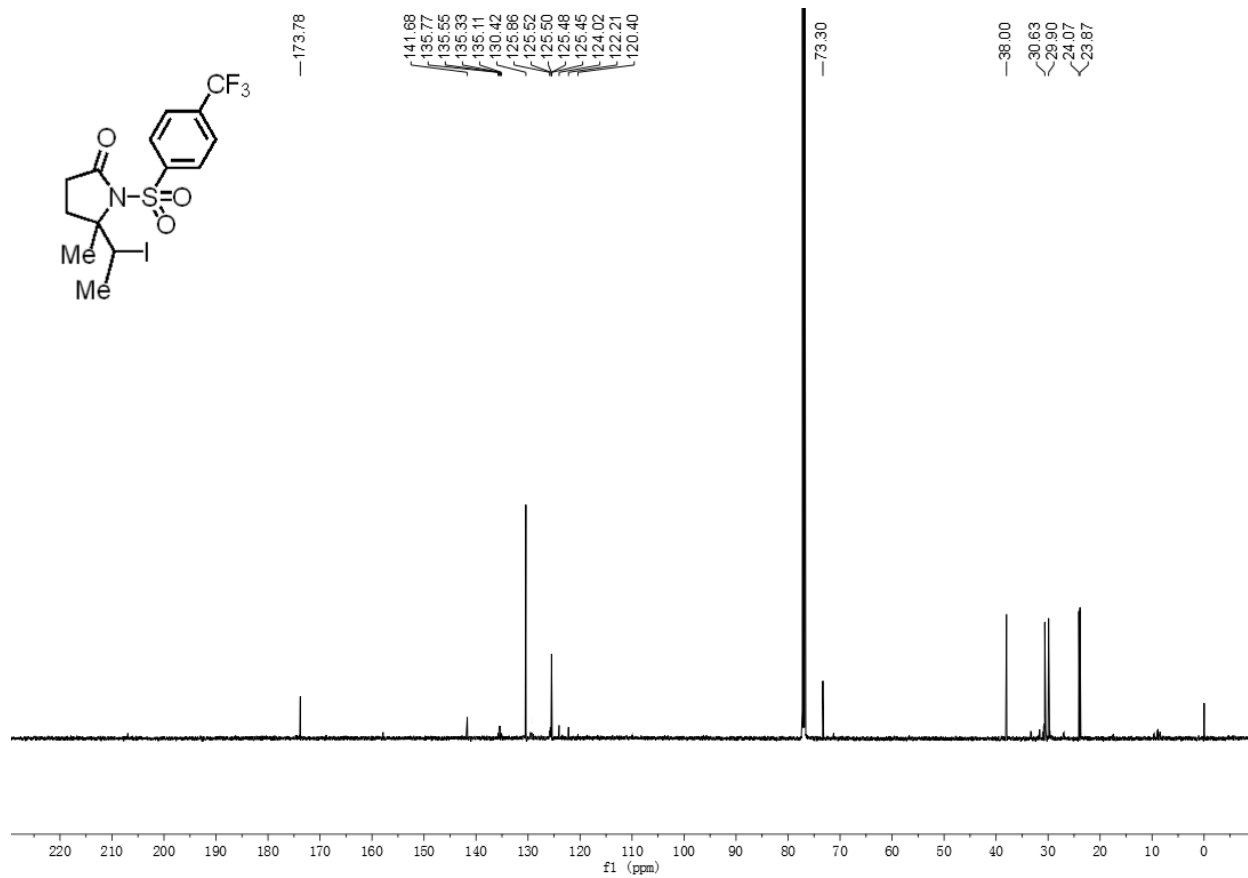



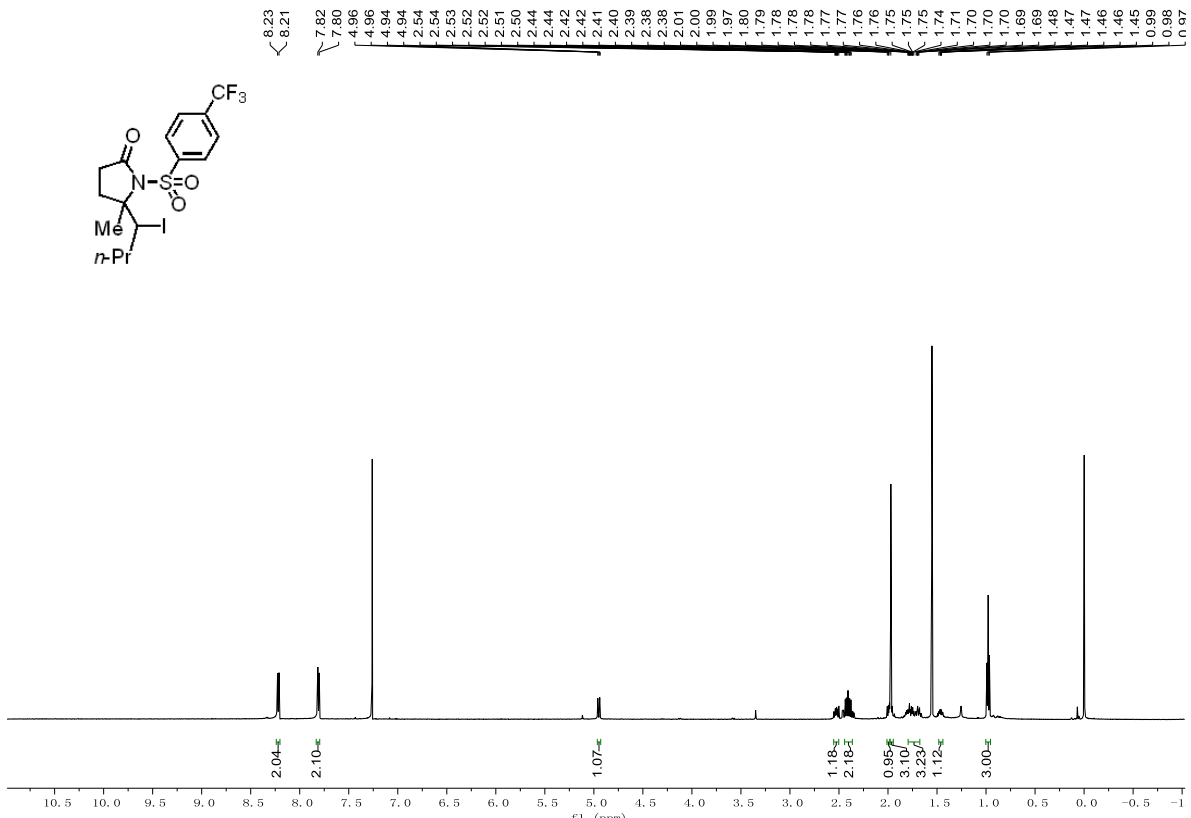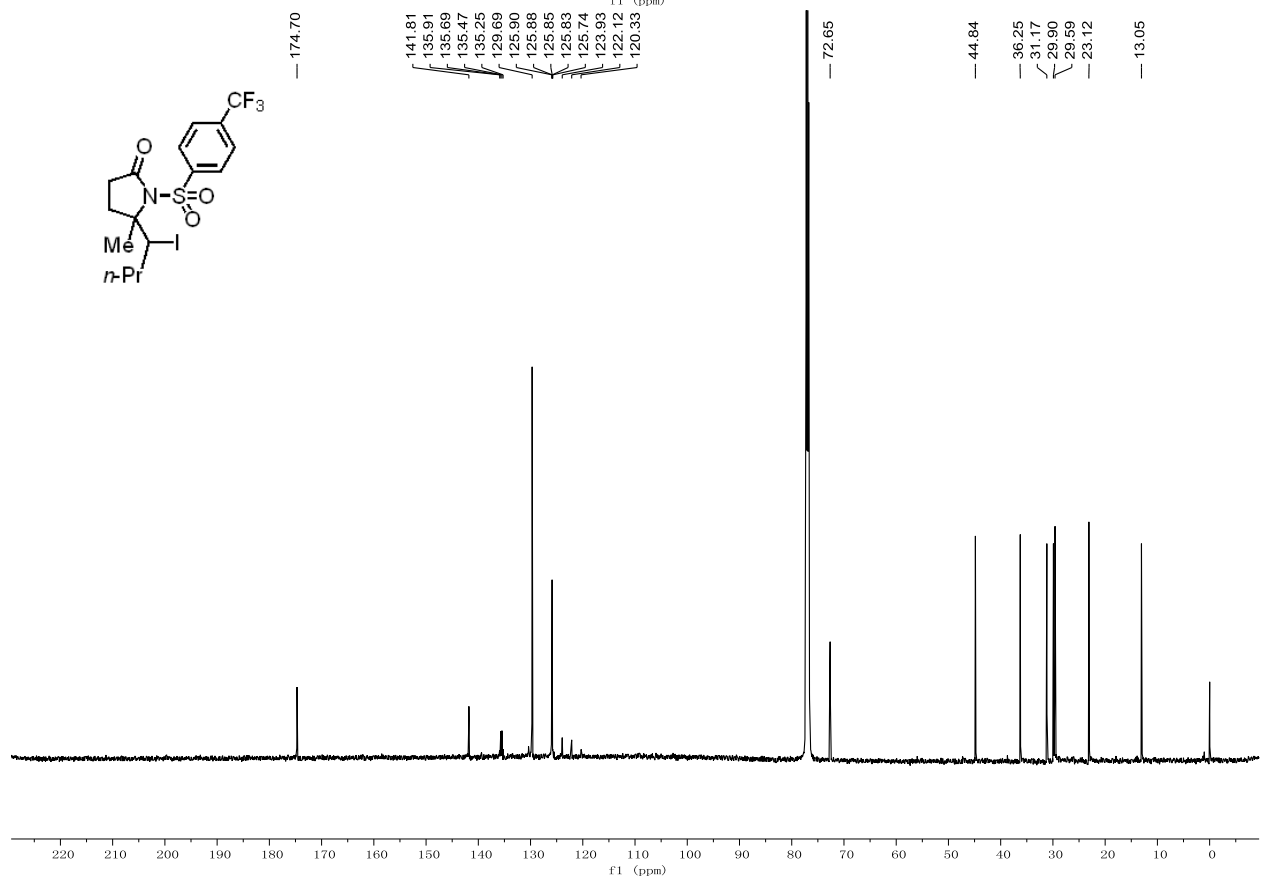

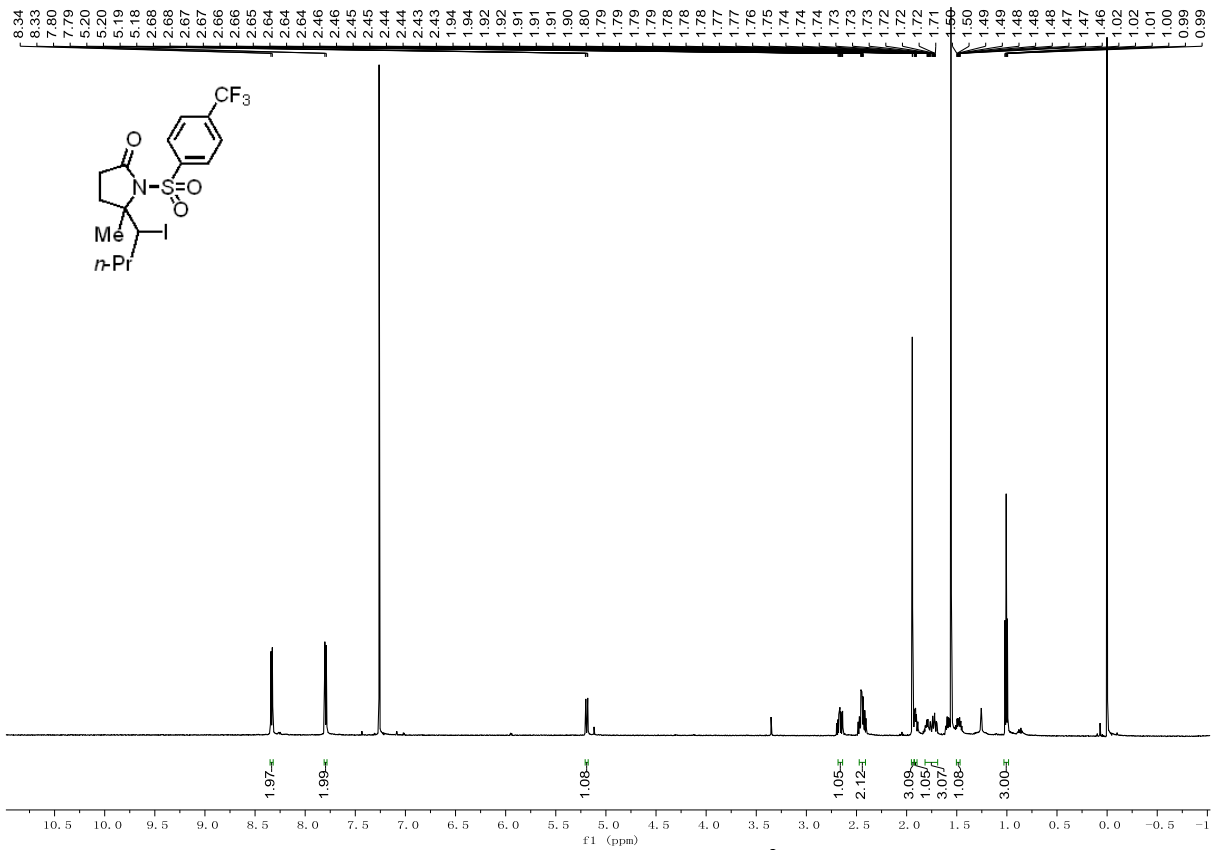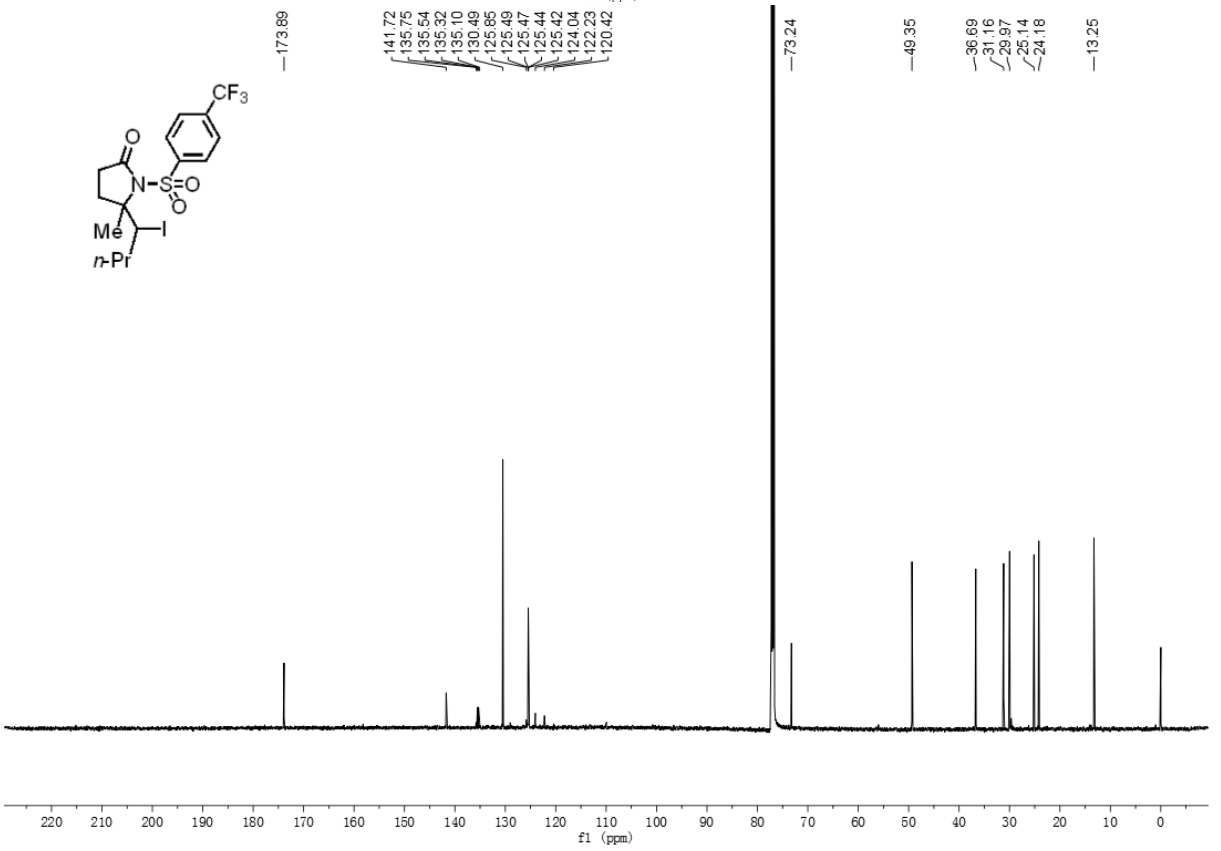

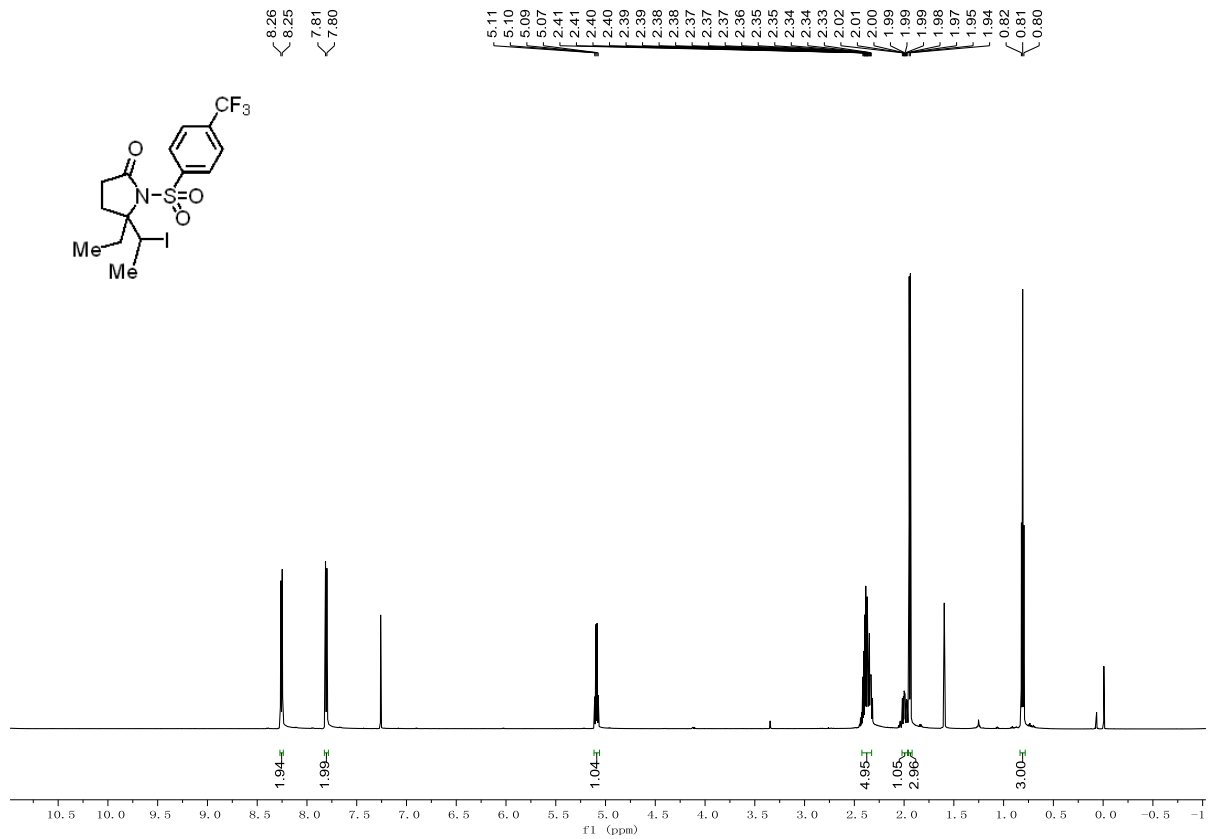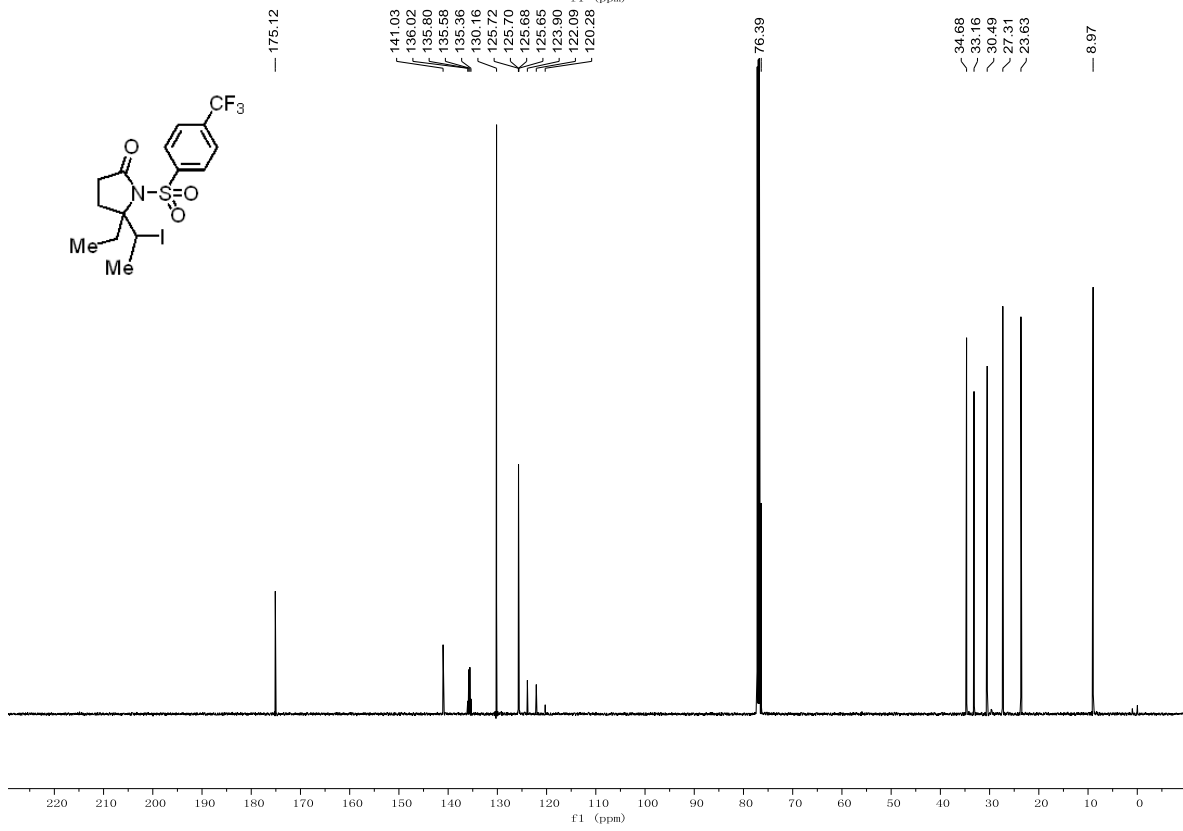

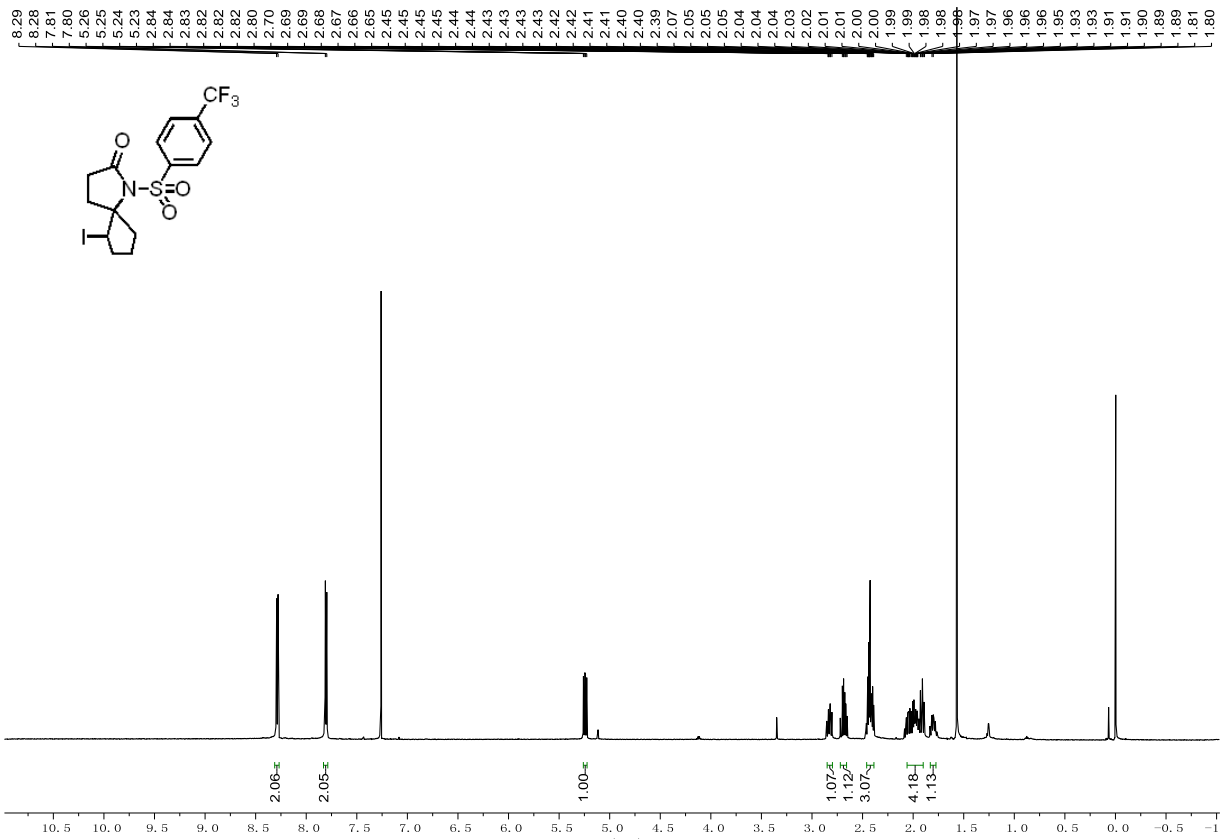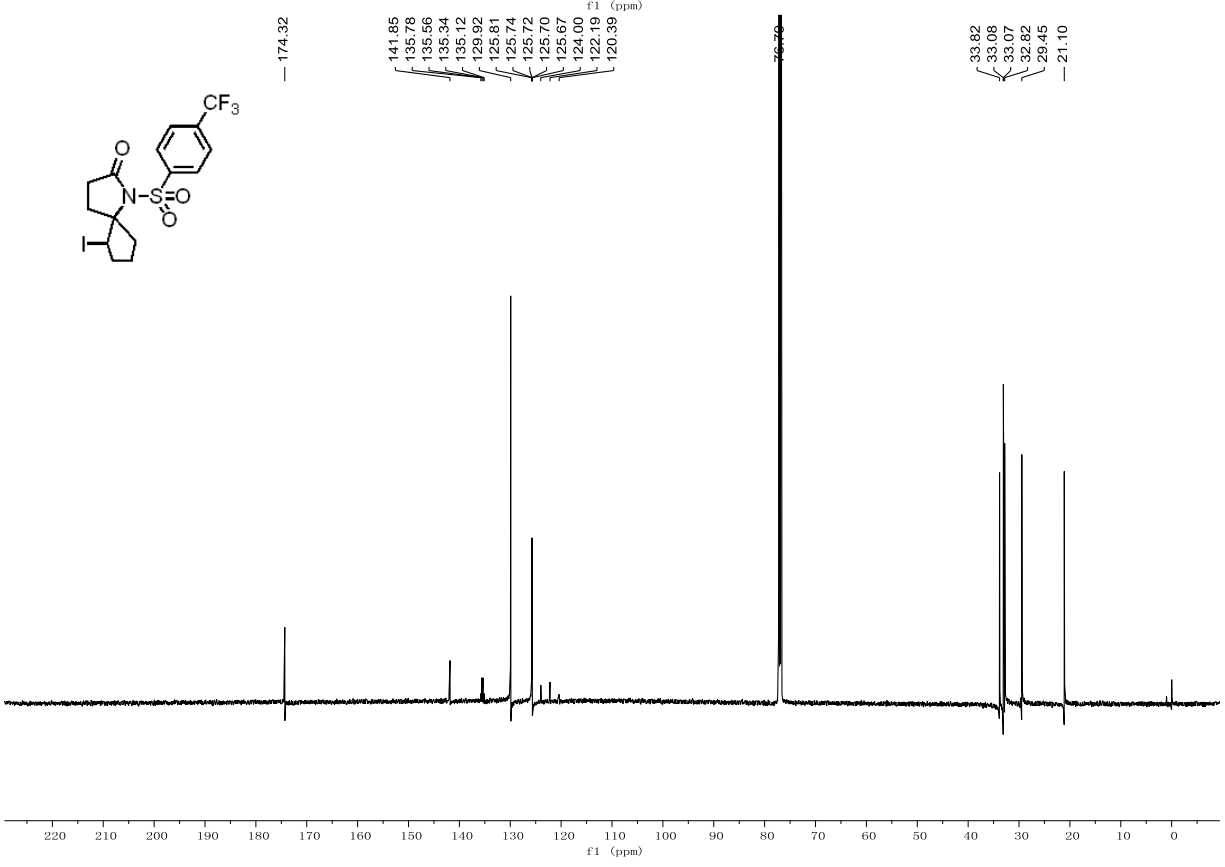

8.33  
7.80  
7.78  
2.86  
2.84  
2.83  
2.81  
2.68  
2.67  
2.66  
2.65  
2.64  
2.57  
2.56  
2.55  
2.54  
2.54  
2.41  
2.40  
2.39  
2.39  
2.39  
2.39  
2.38  
2.38  
2.37  
2.37  
2.37  
2.36  
2.36  
2.36  
2.35  
2.35  
2.17  
2.16  
2.15  
2.15  
2.14  
2.13  
2.13  
2.12  
2.12  
2.11  
2.11  
2.10  
2.08  
2.08  
2.06  
2.06  
2.04  
2.04  
1.93  
1.93  
1.92  
1.92  
1.91  
1.91  
1.90  
1.51  
1.50  
1.49  
1.48  
1.47

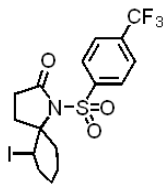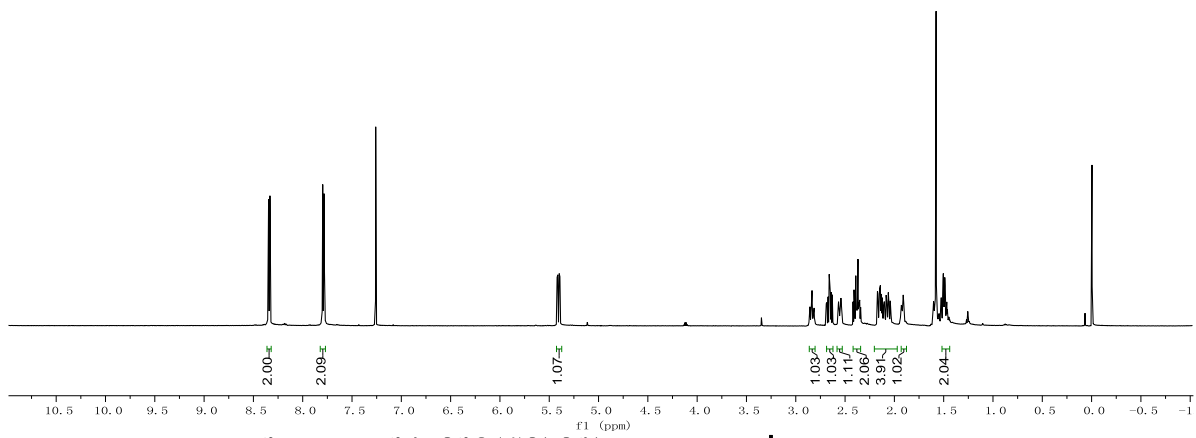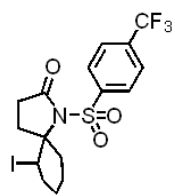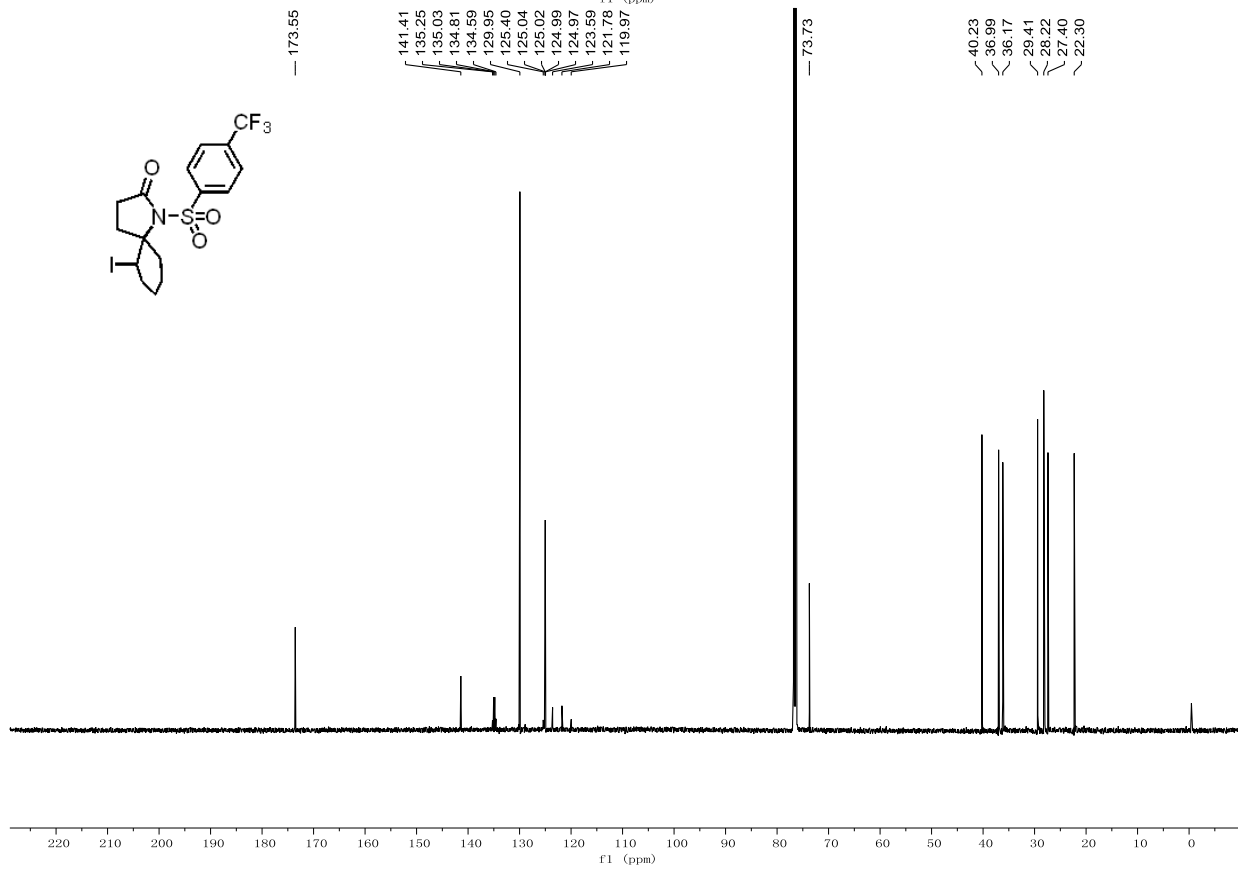

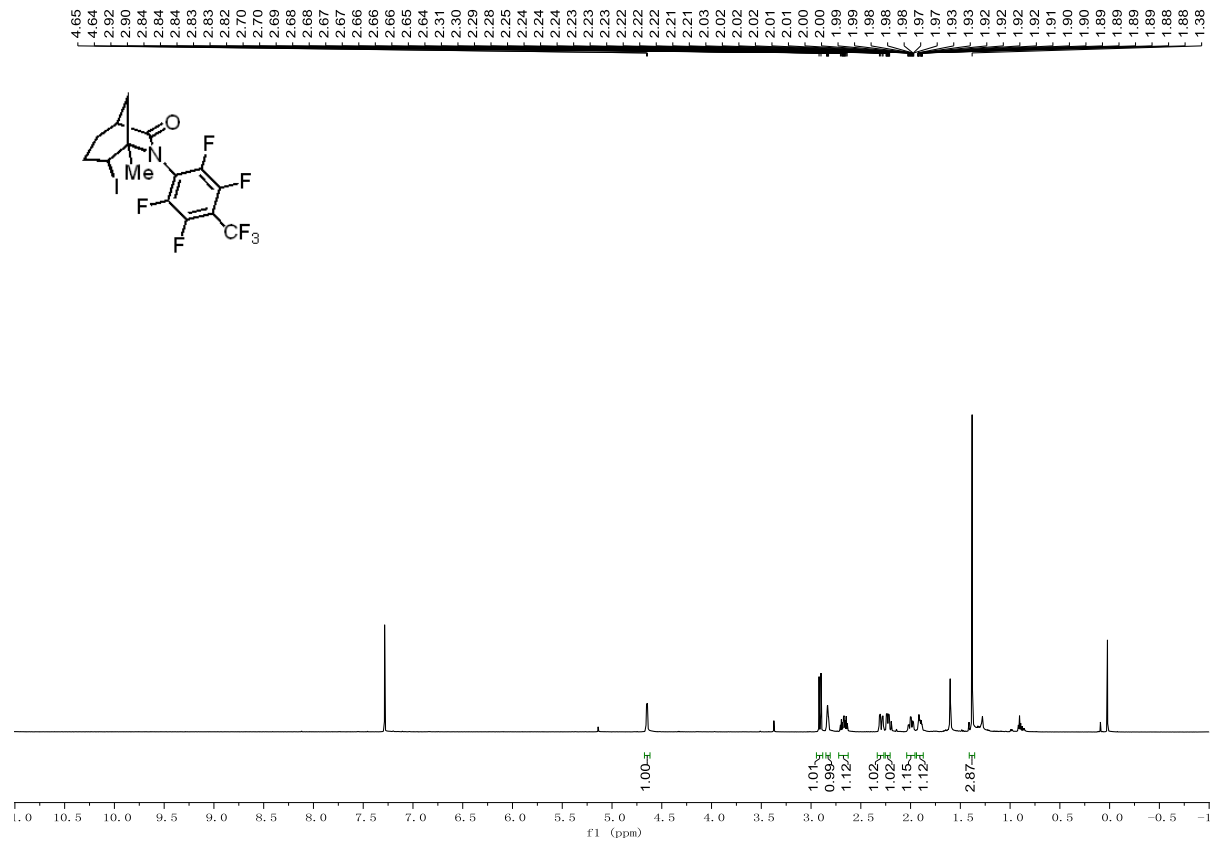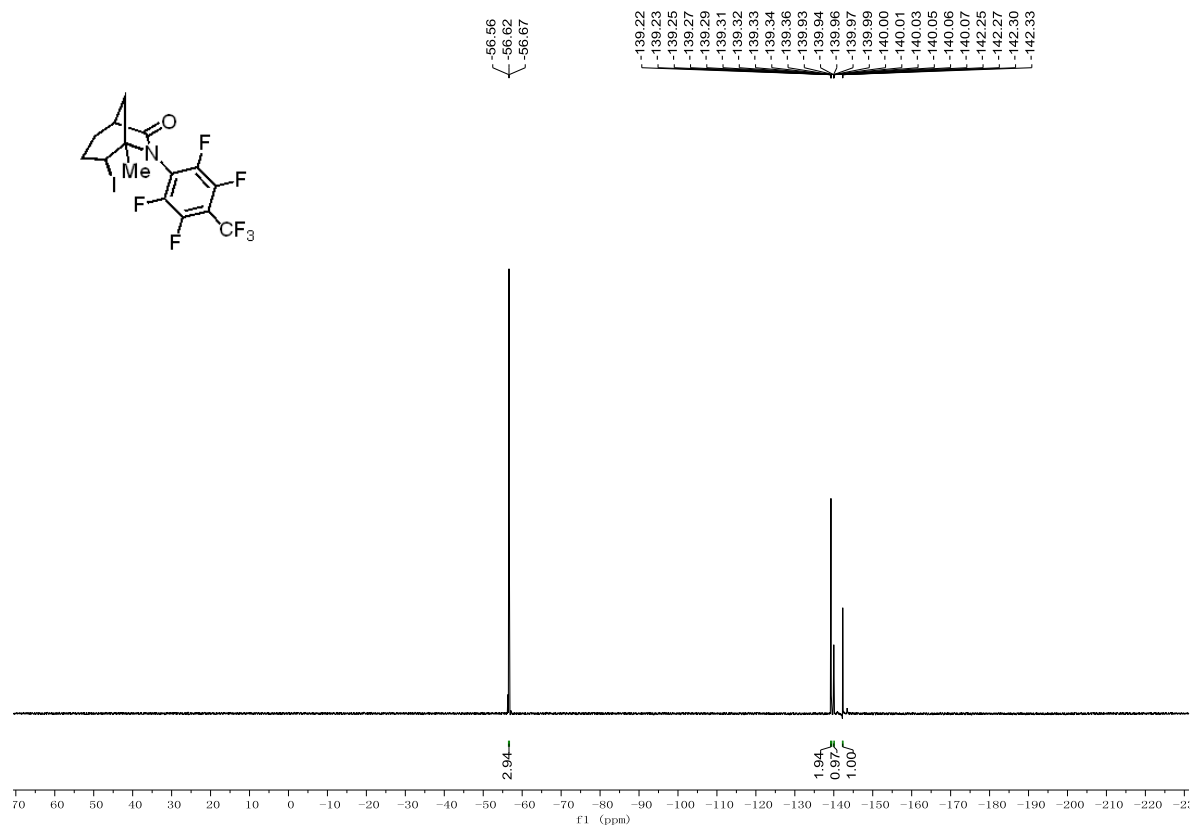

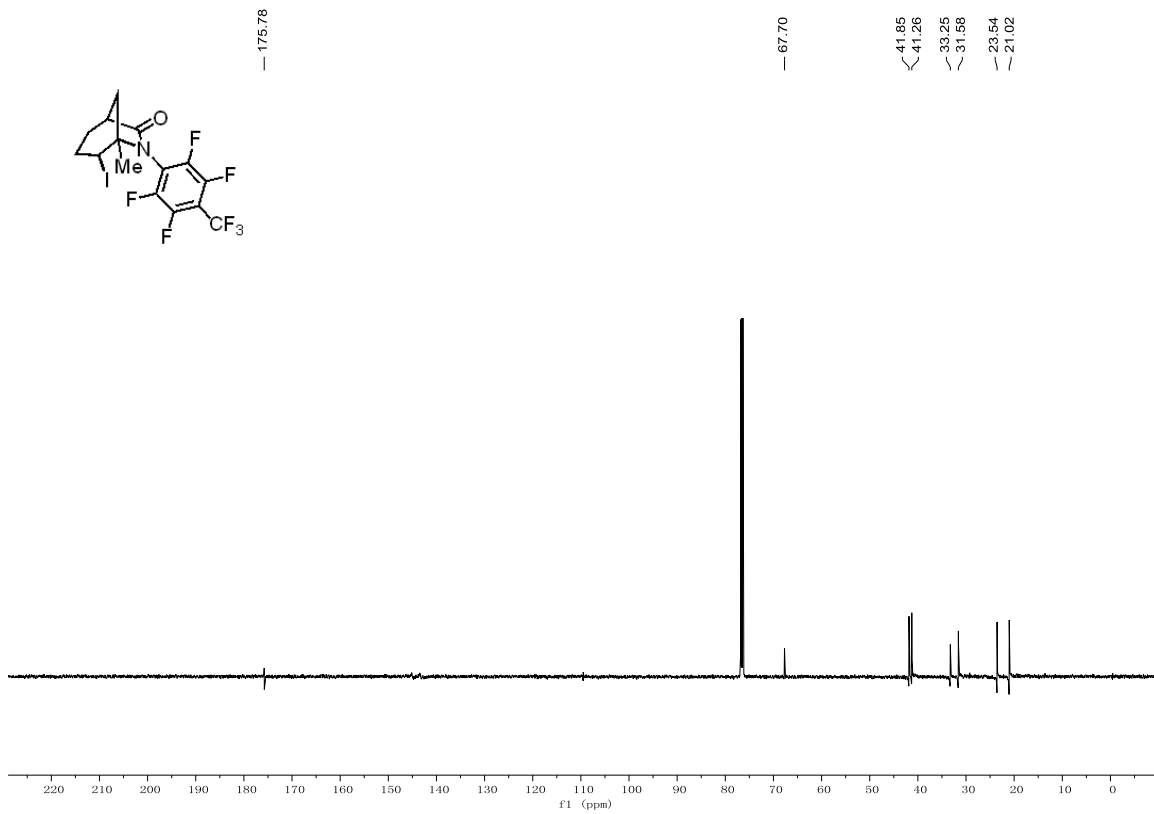

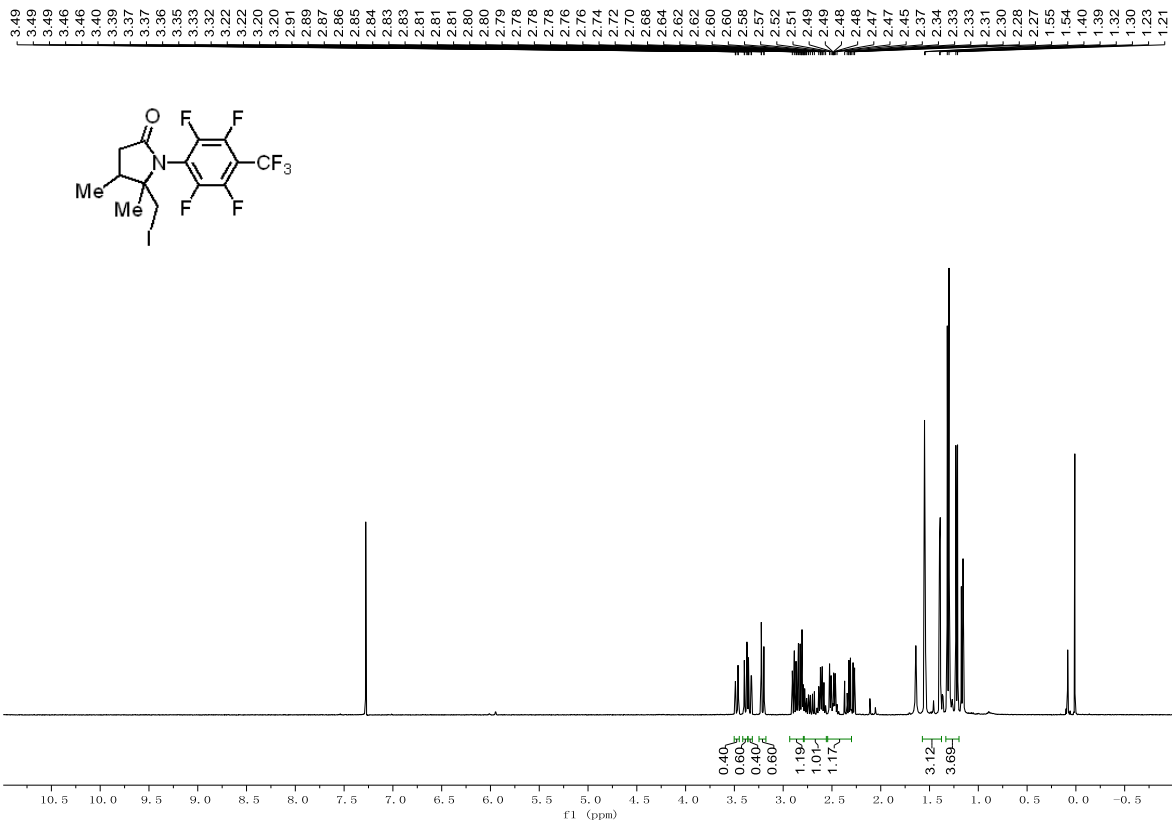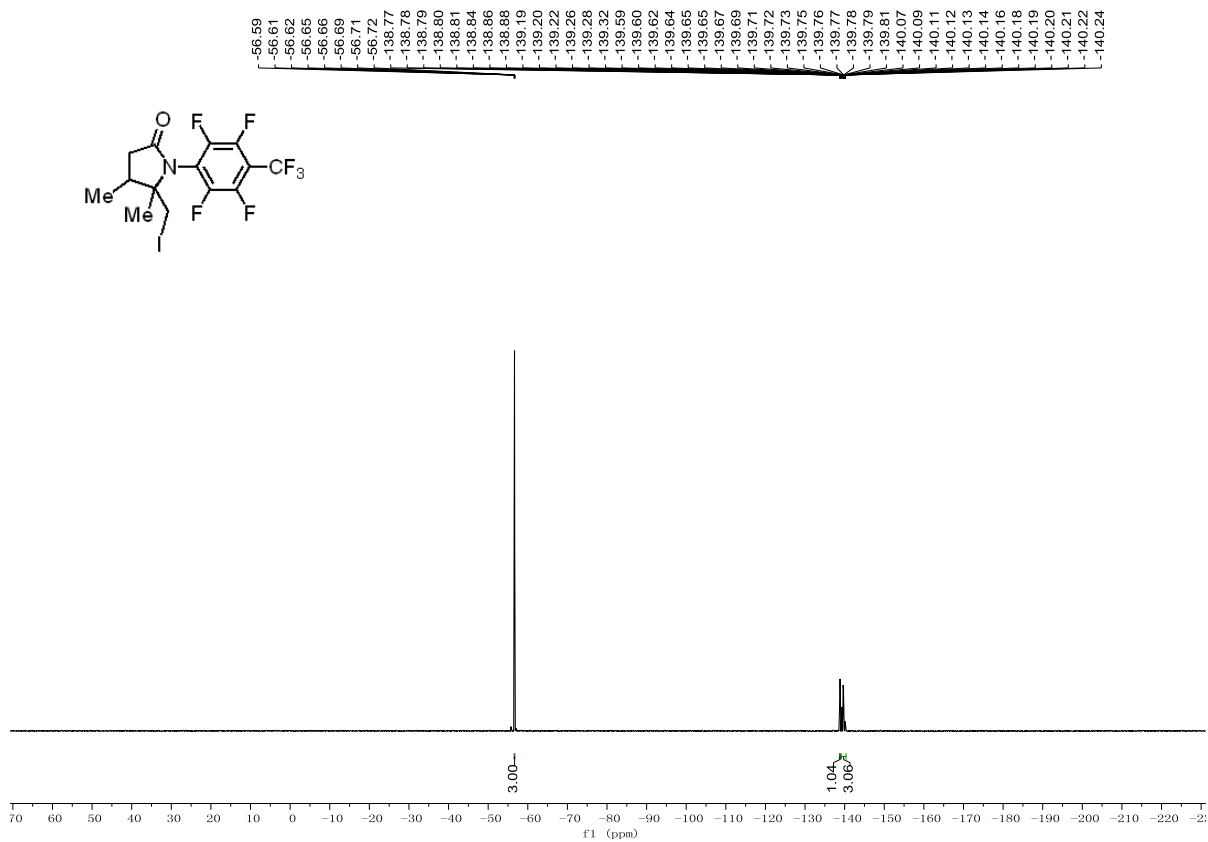



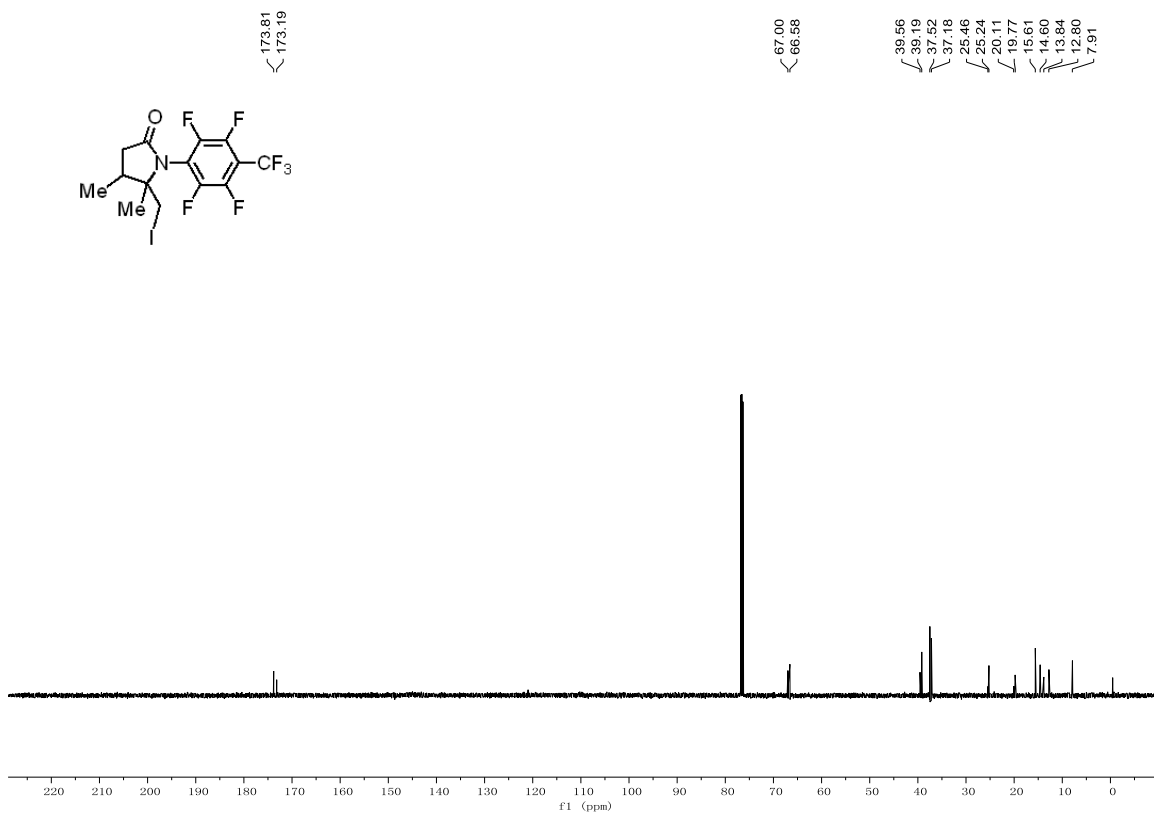

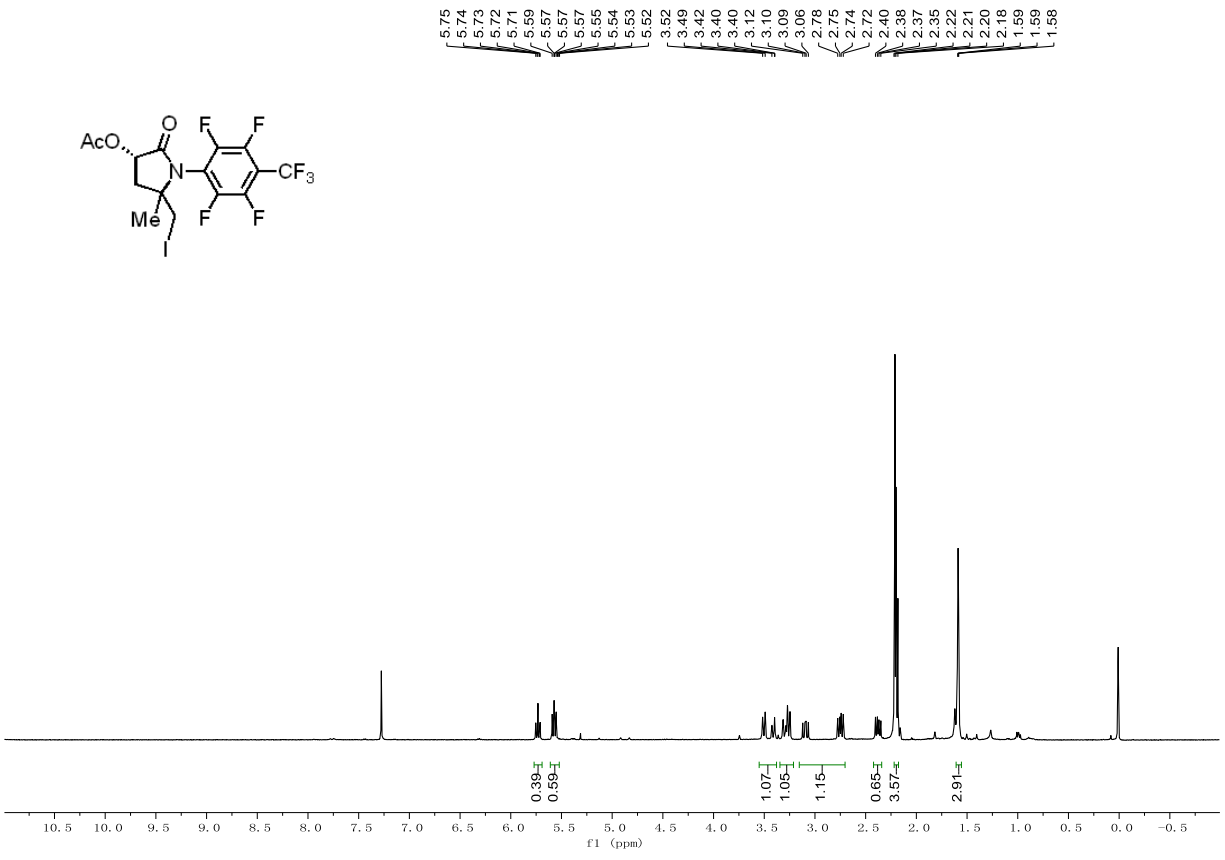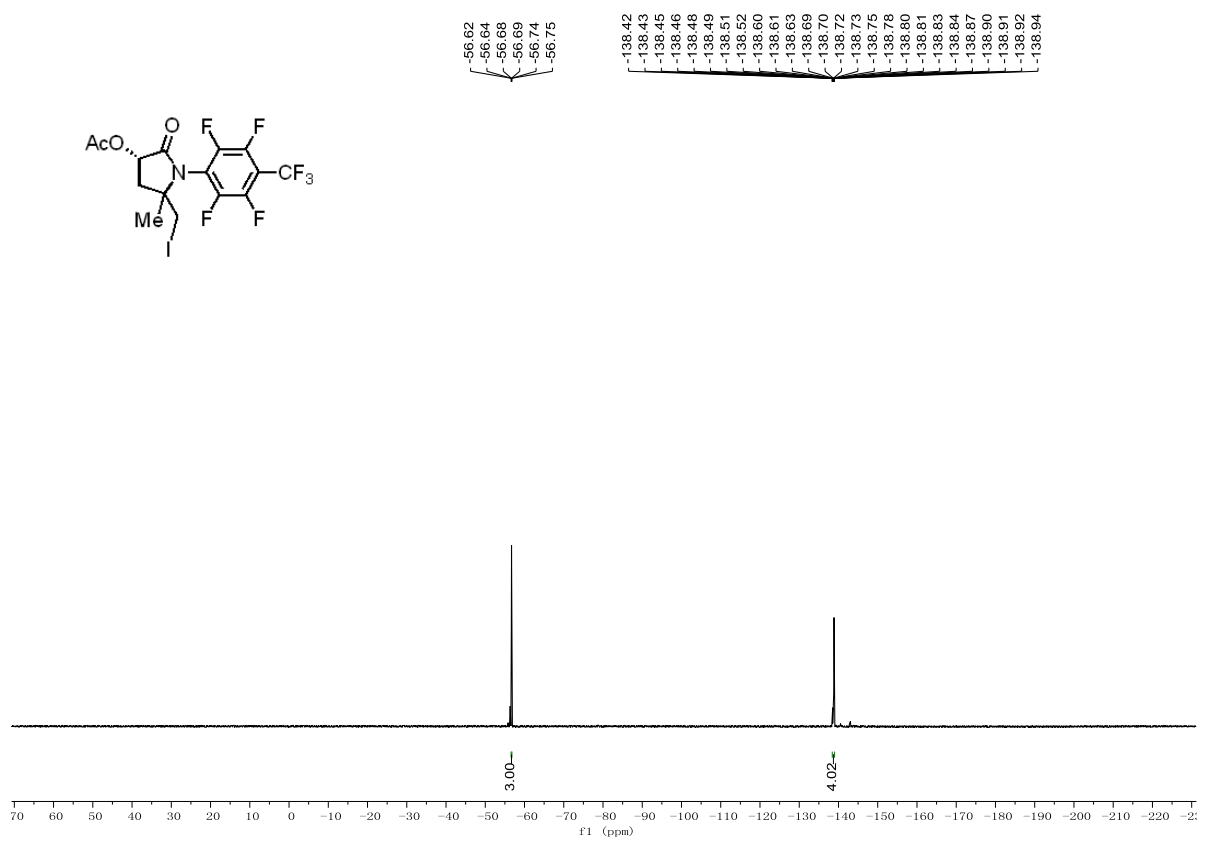

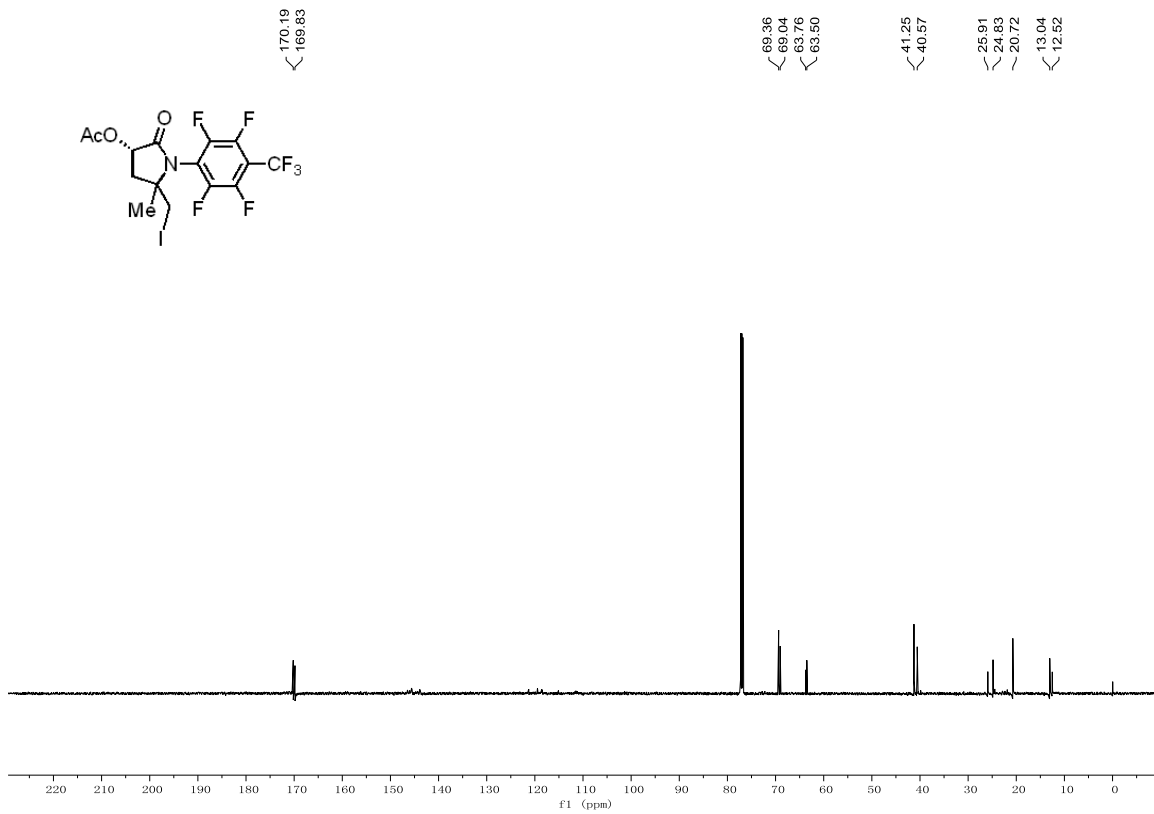

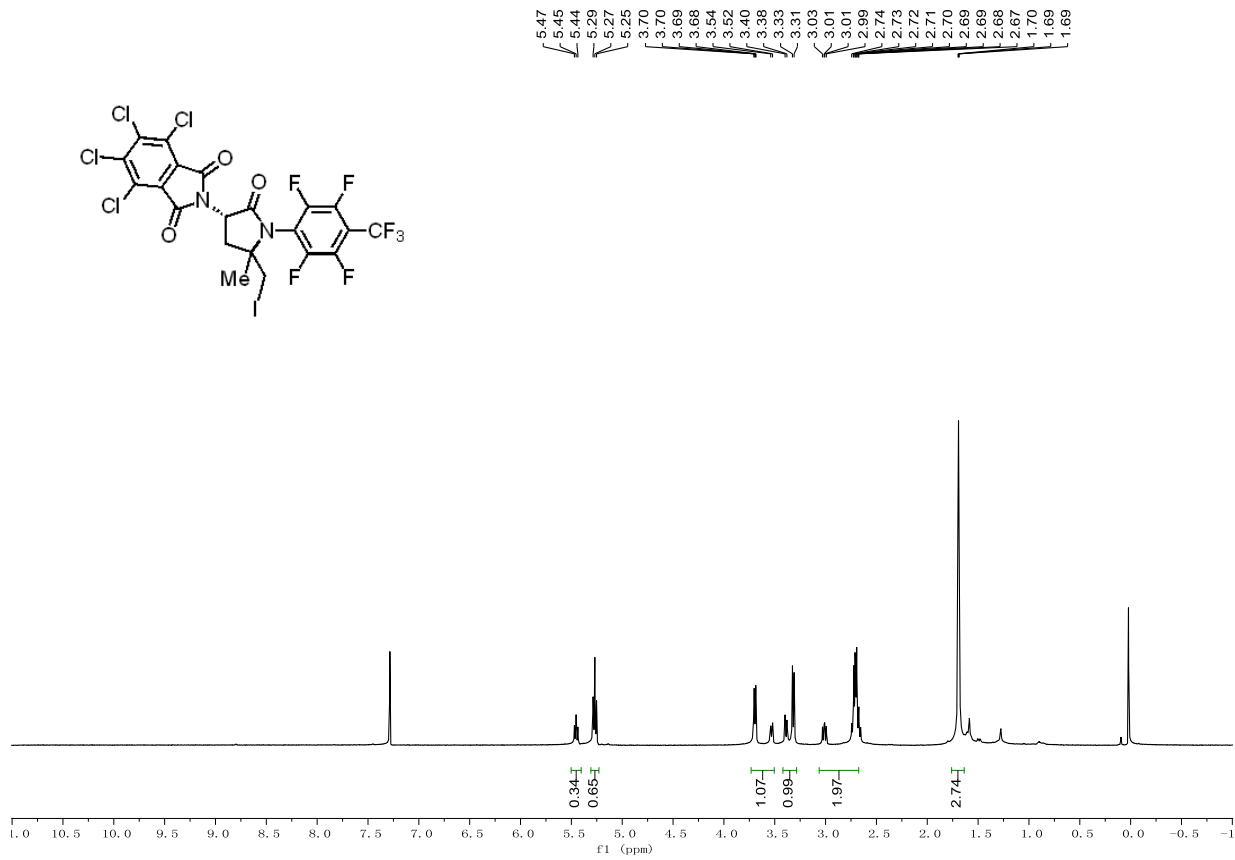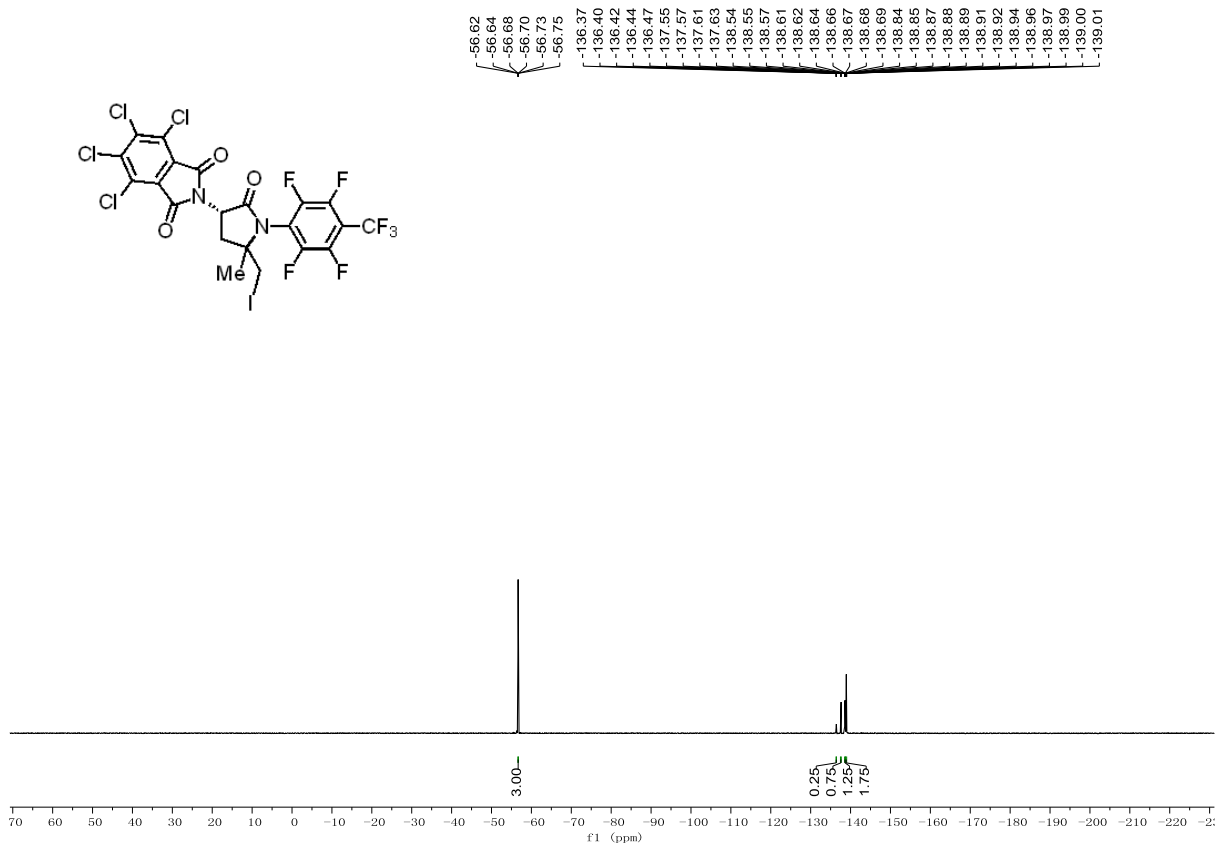

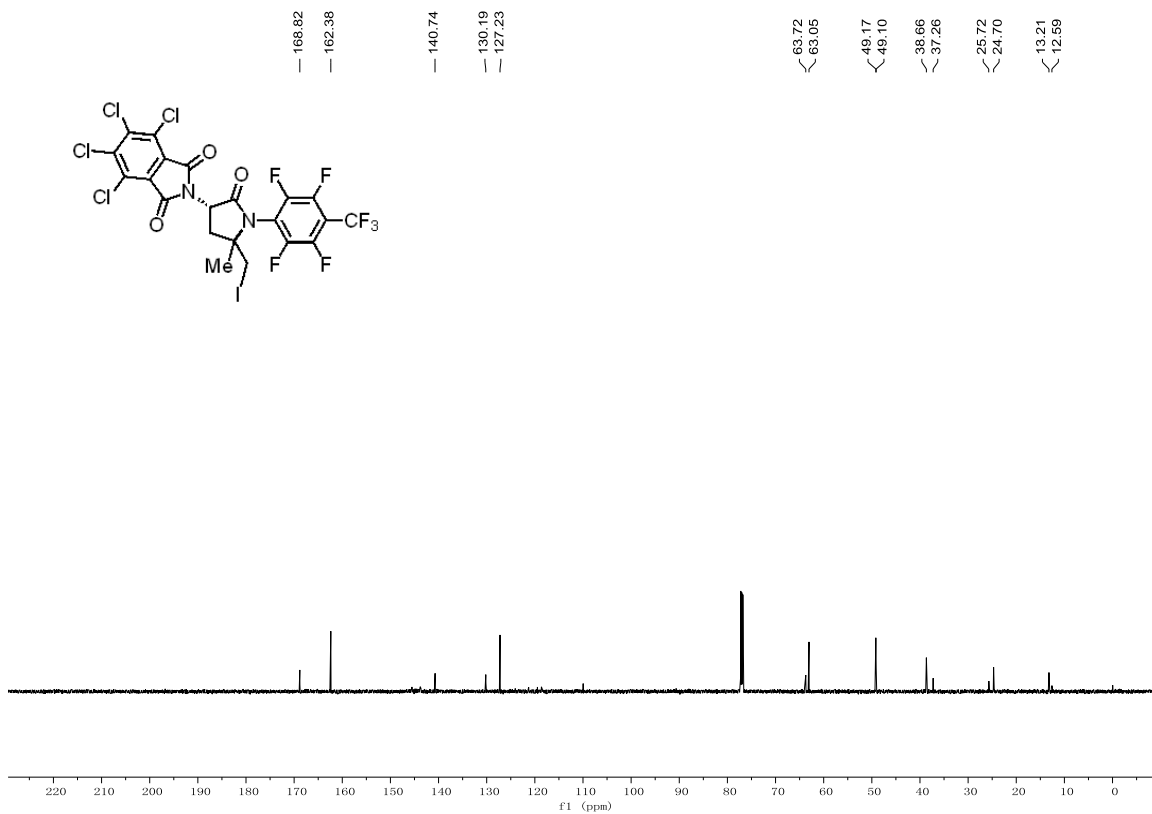

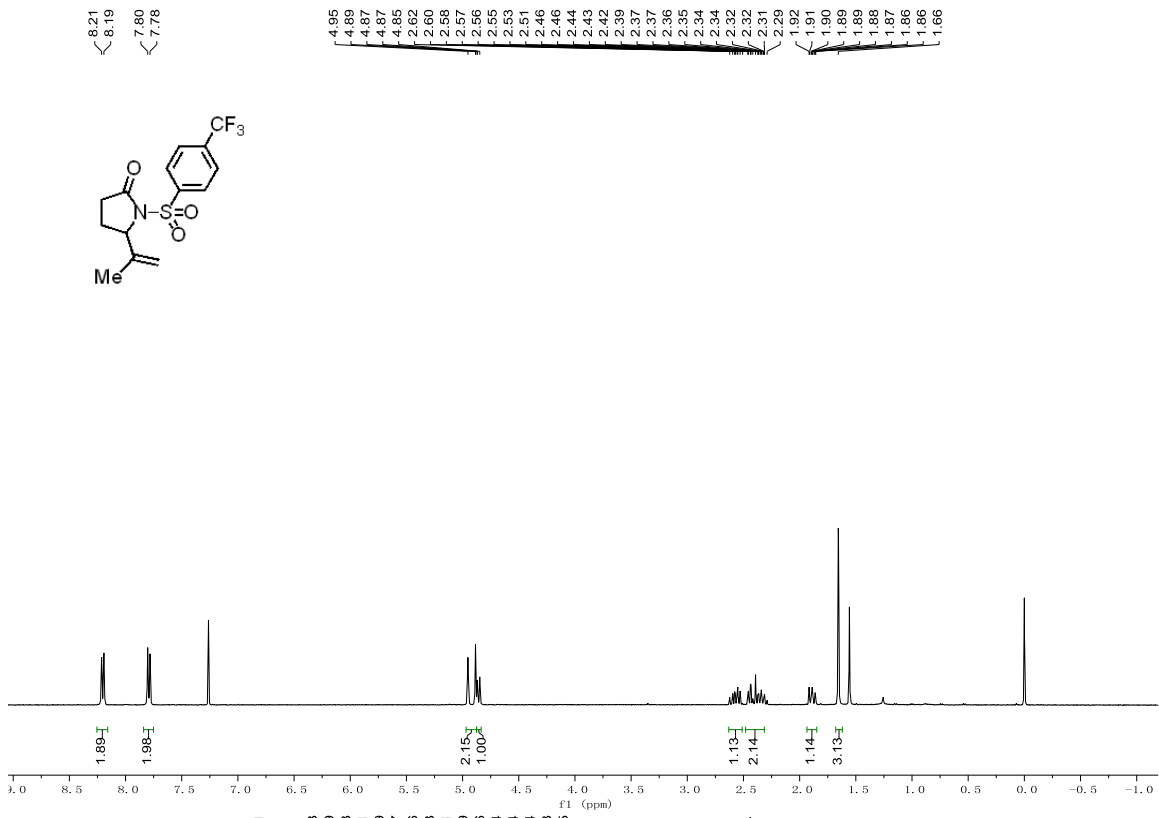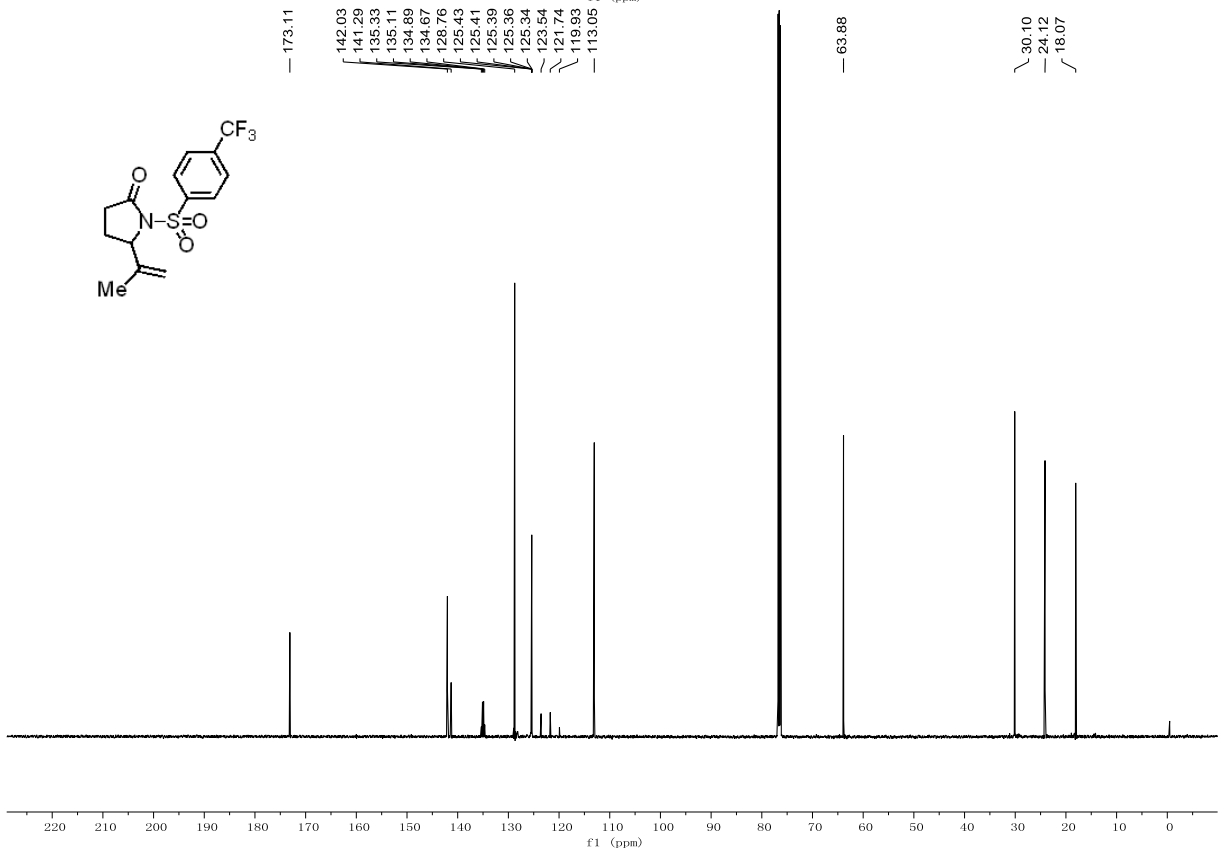

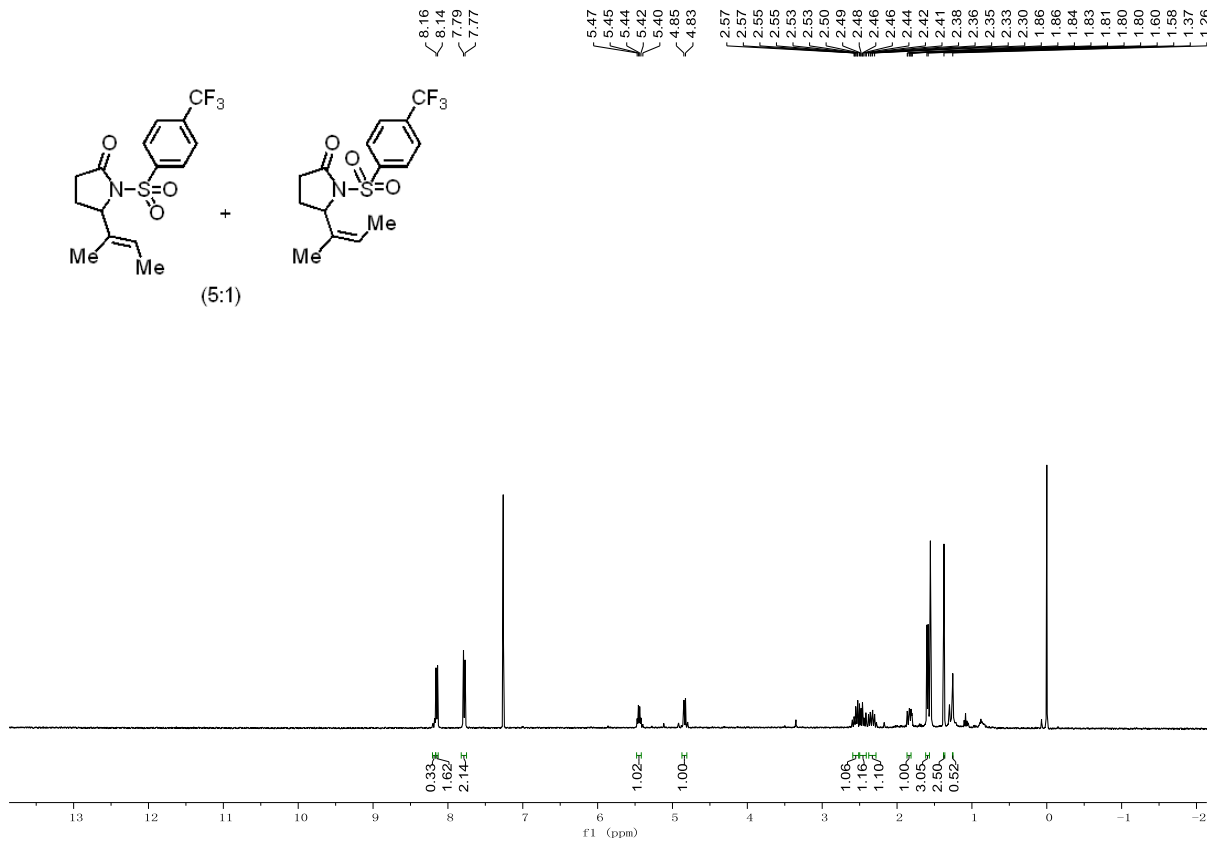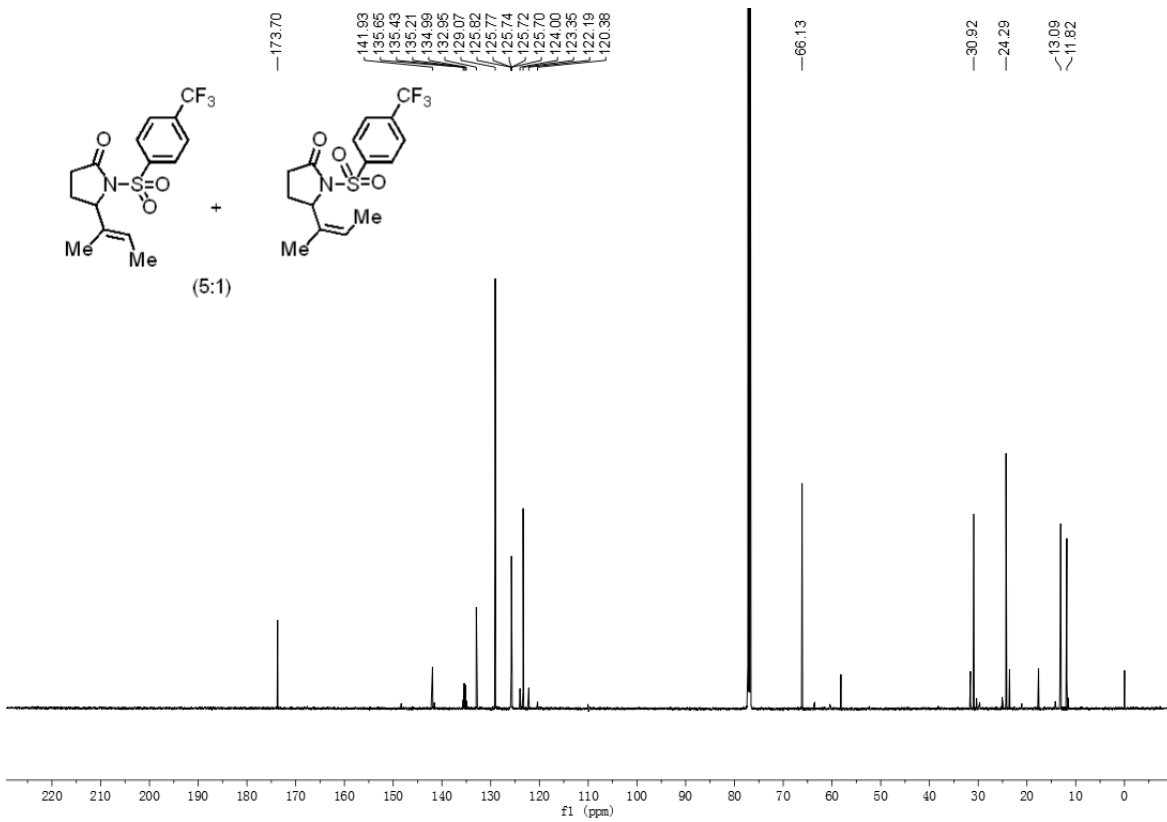

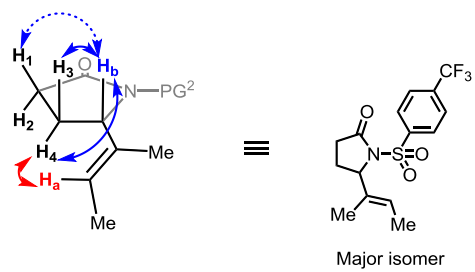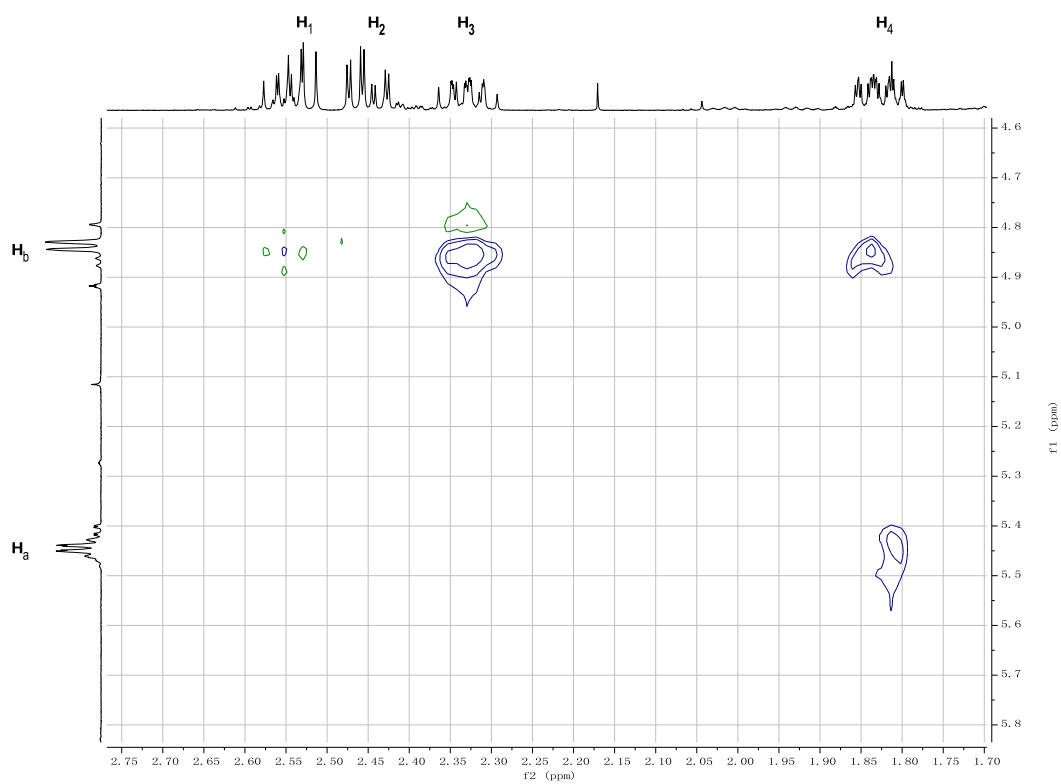



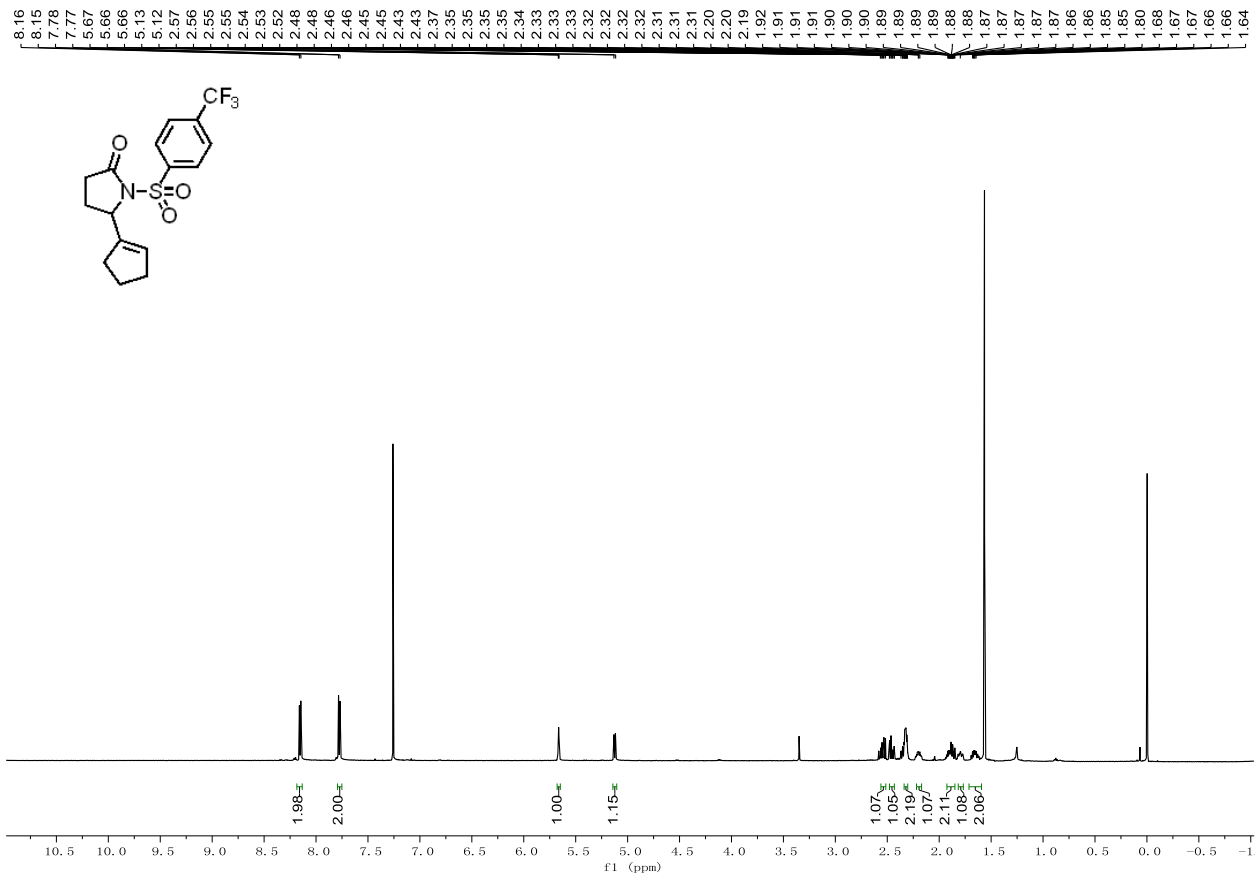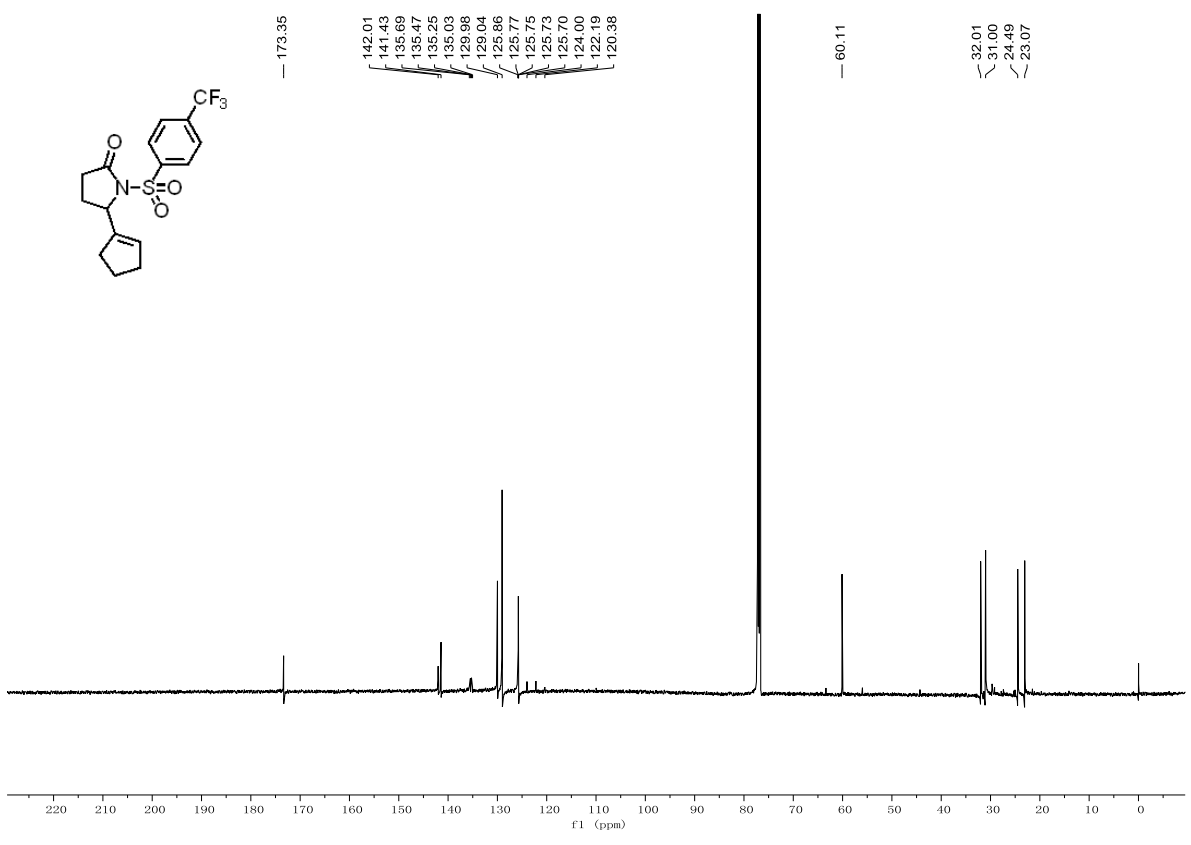

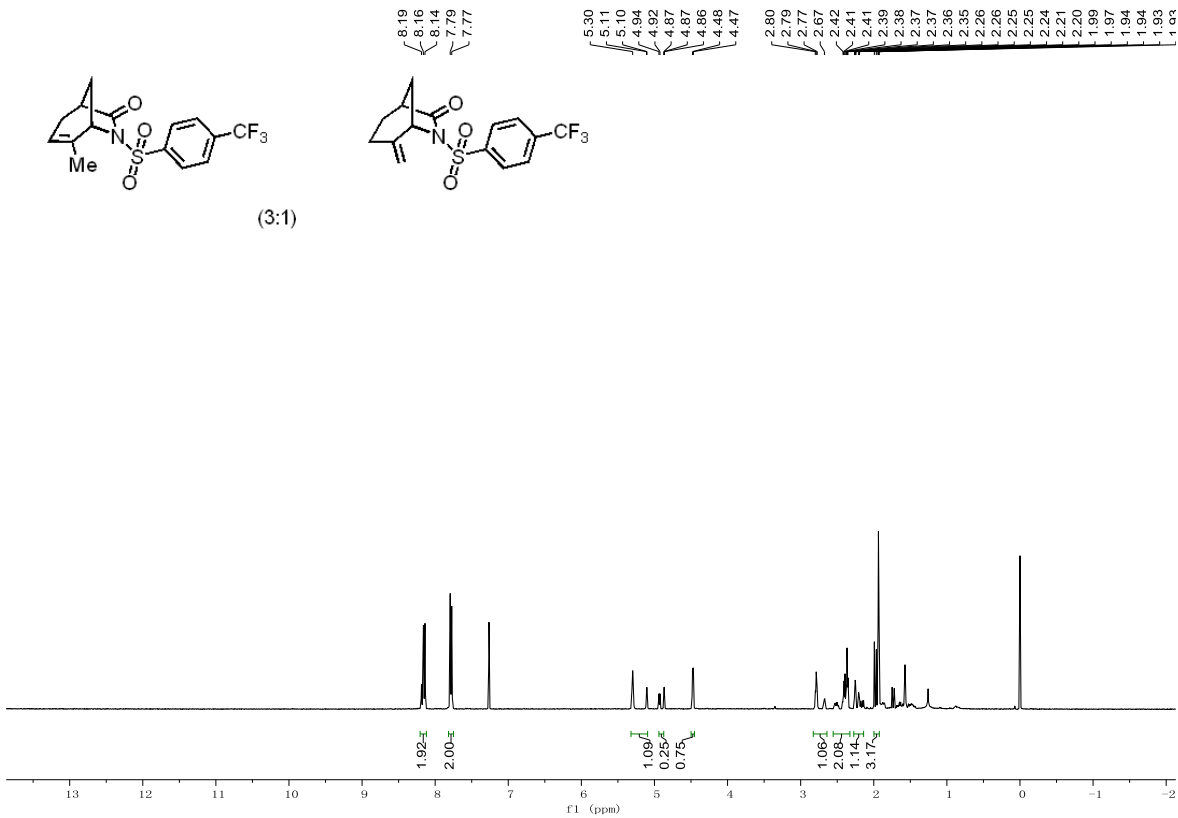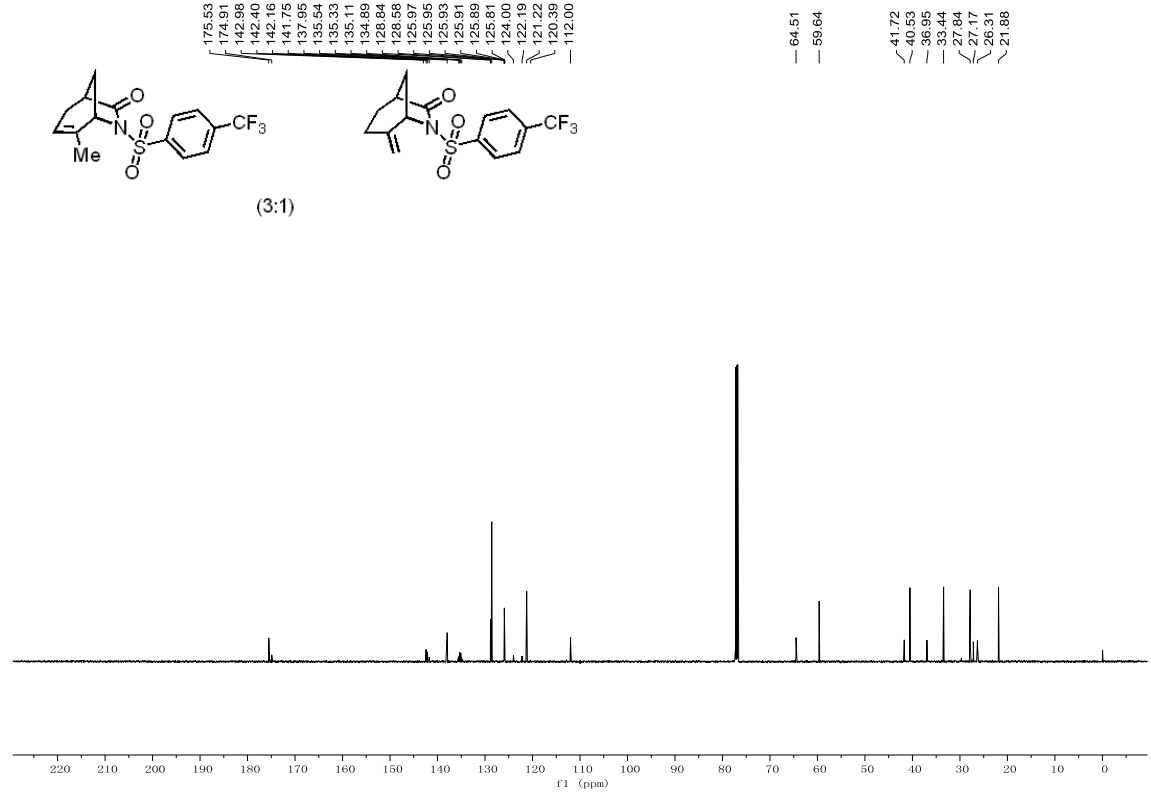

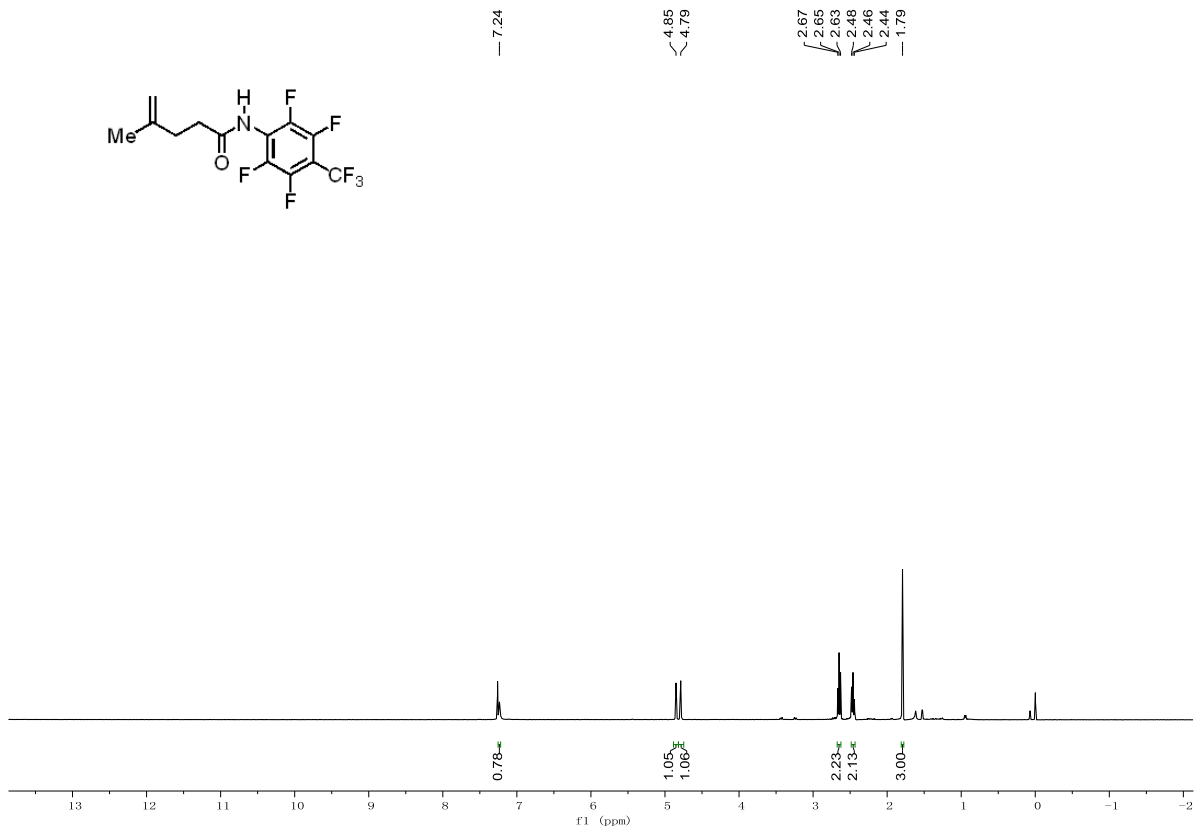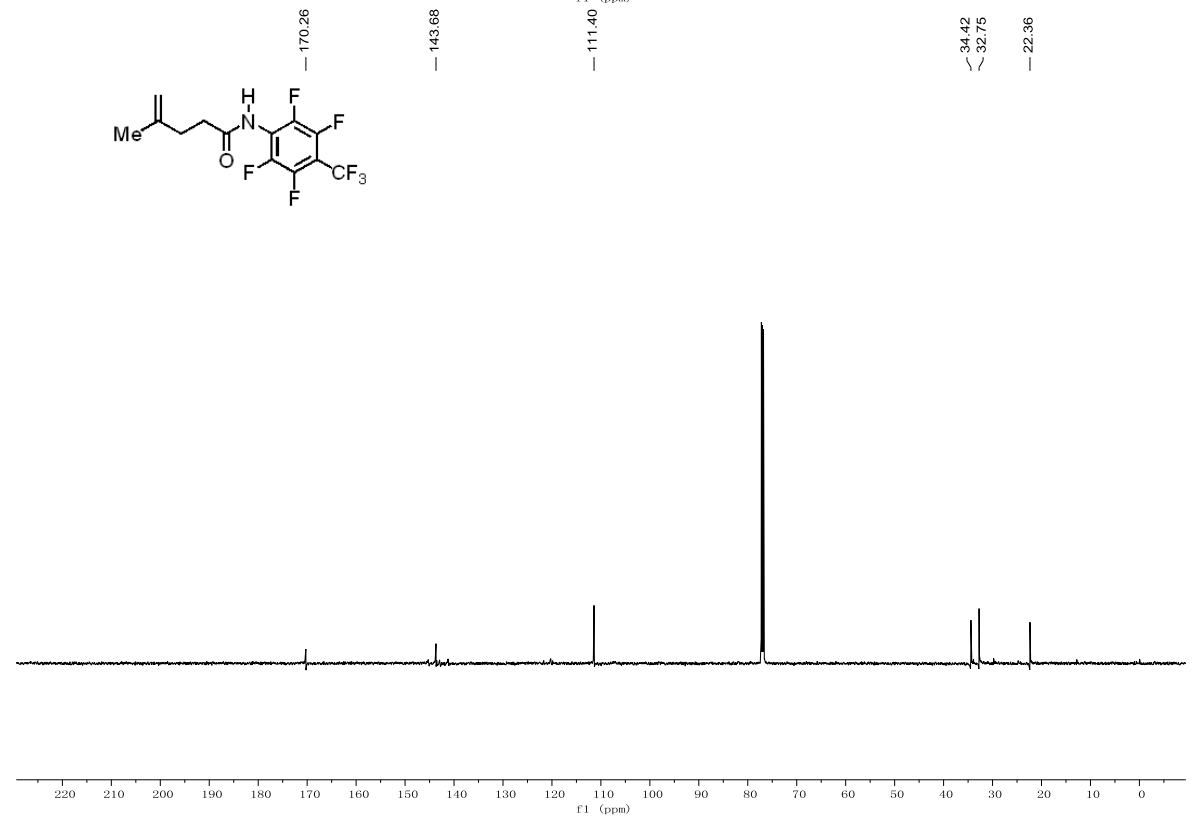

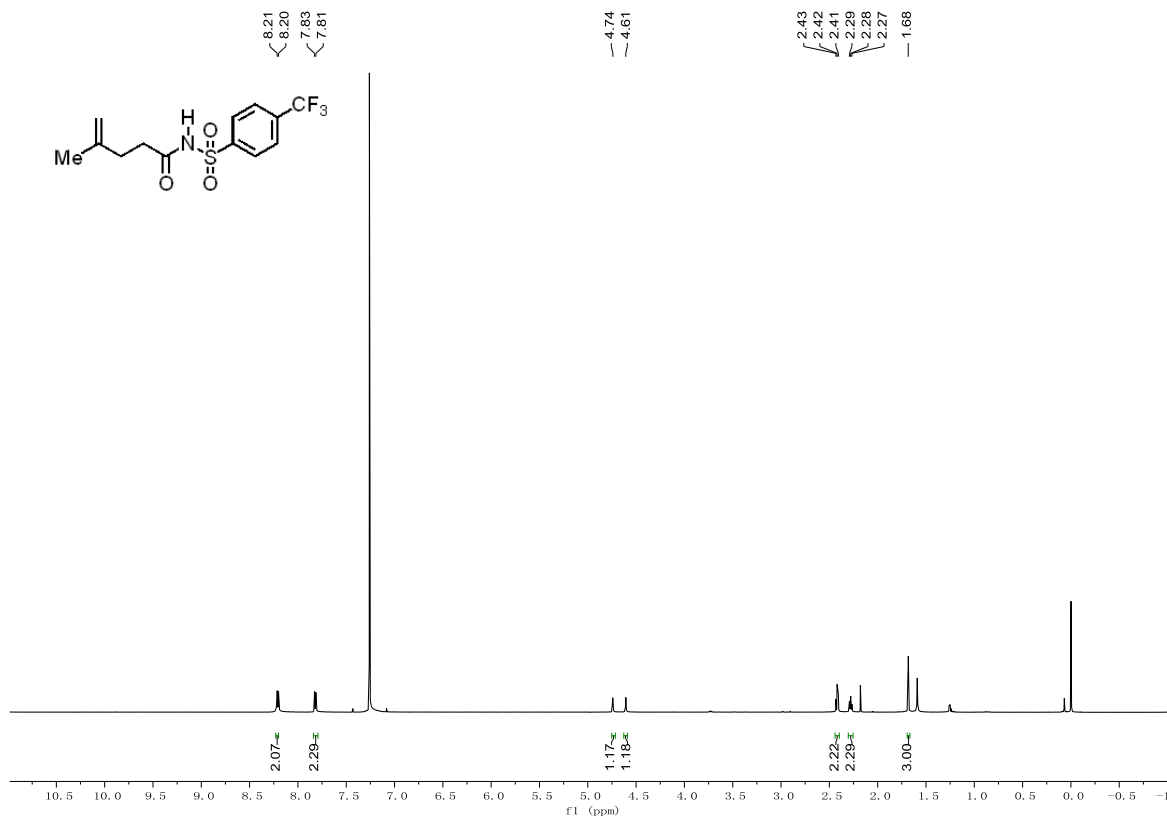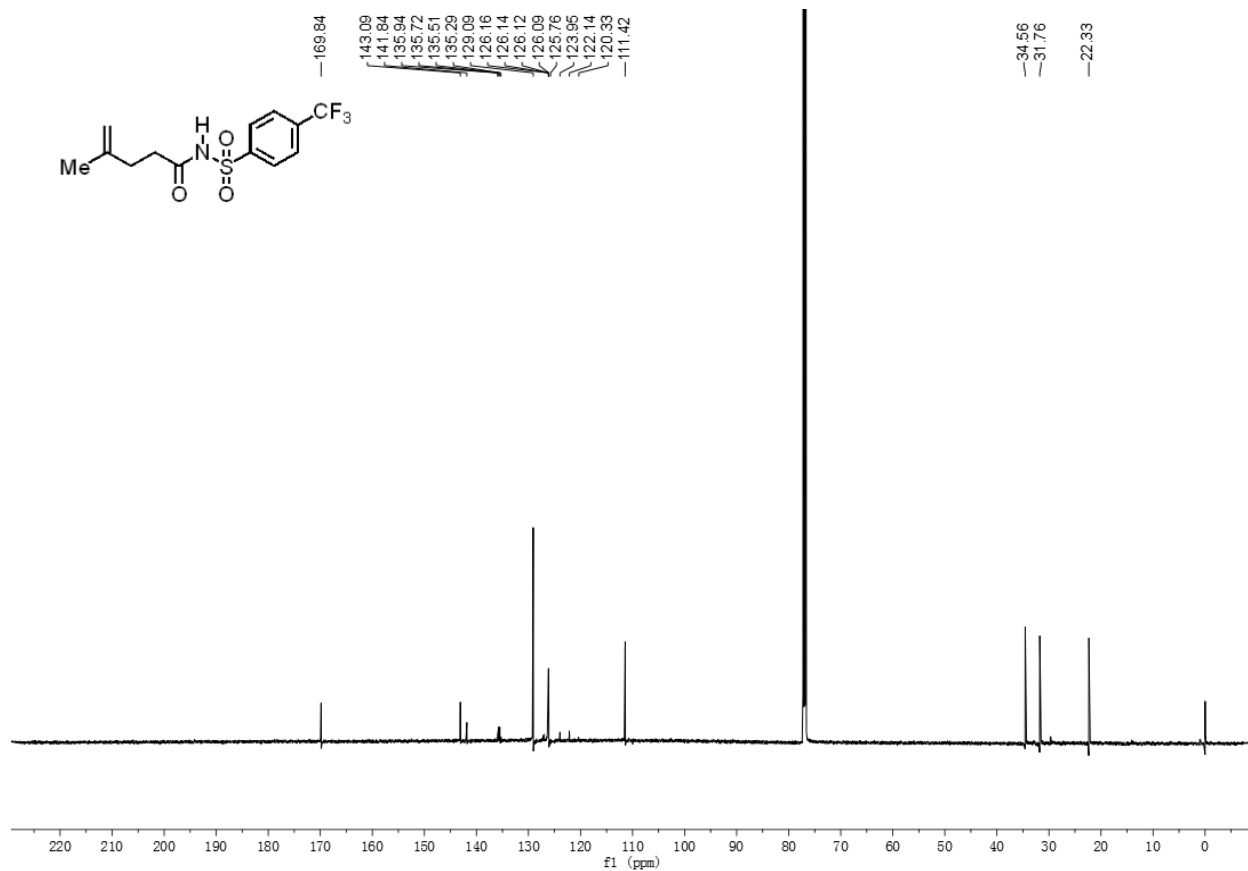

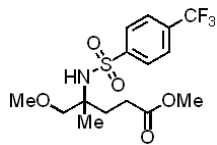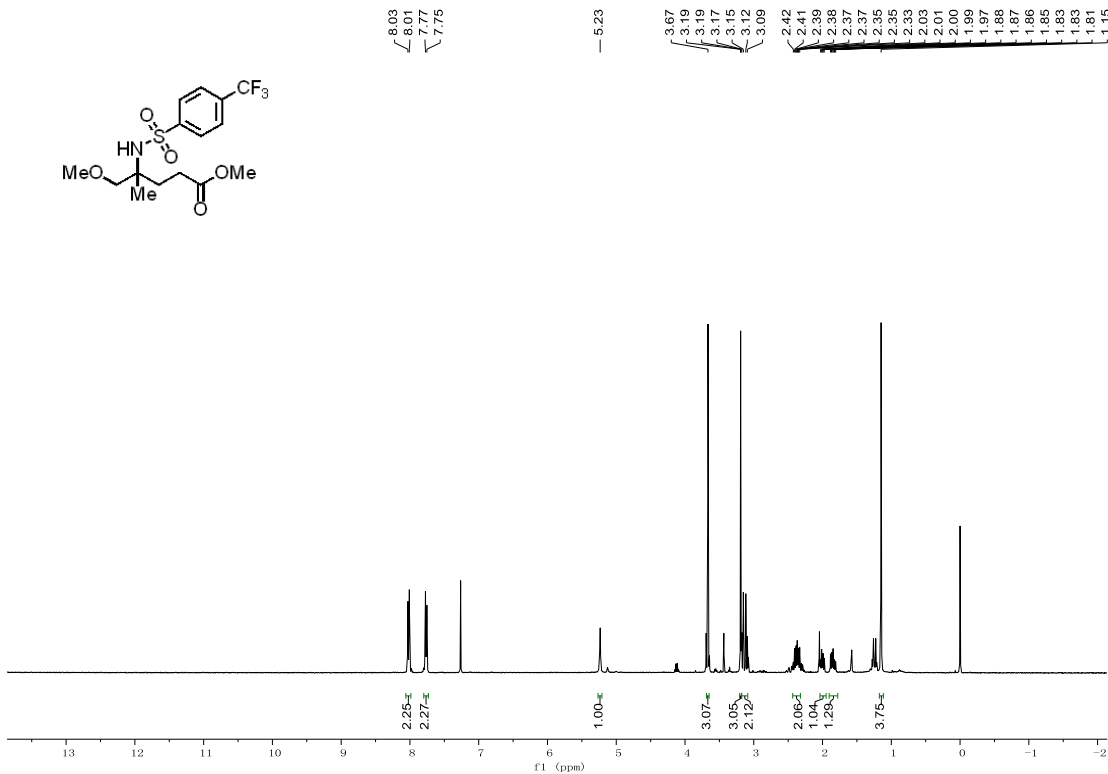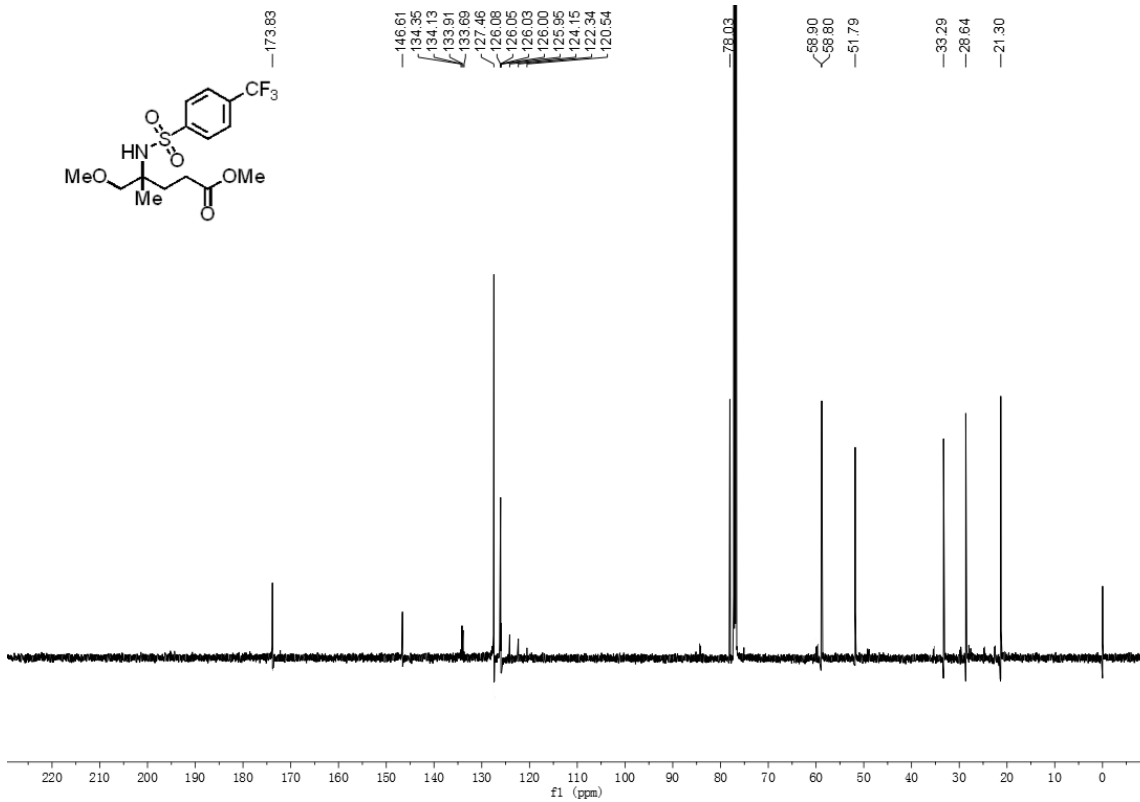

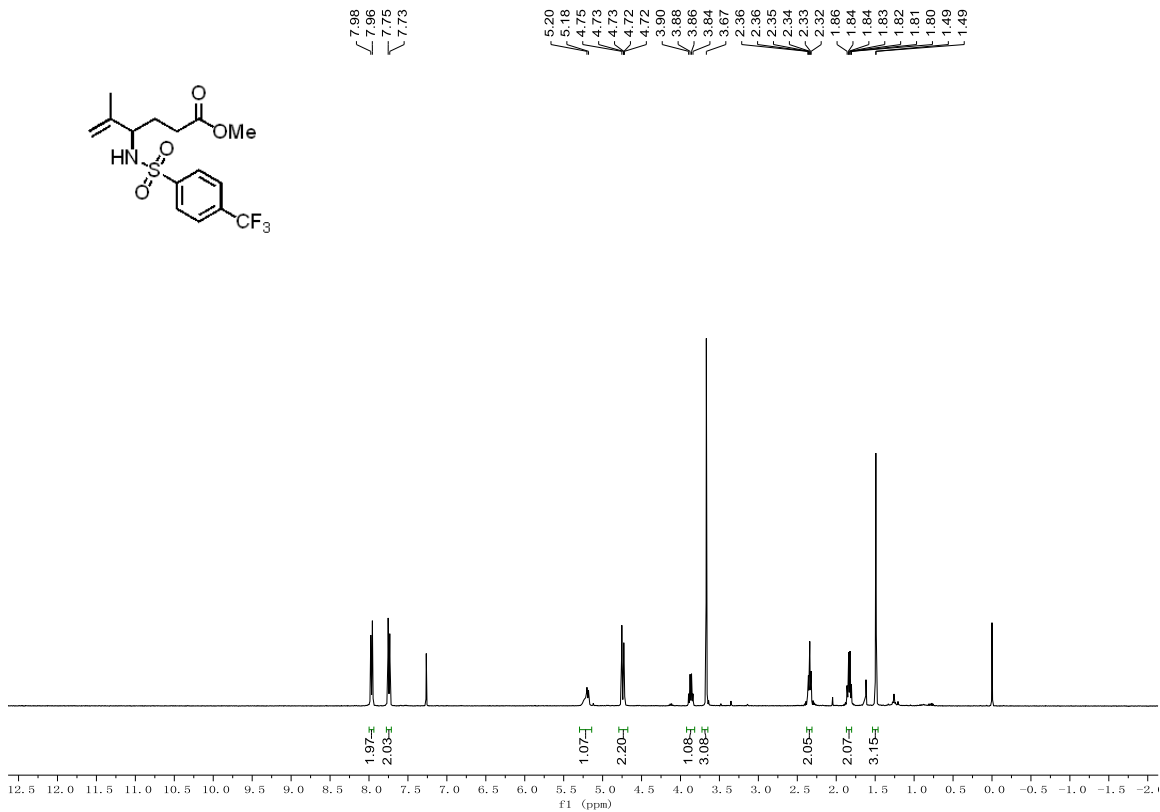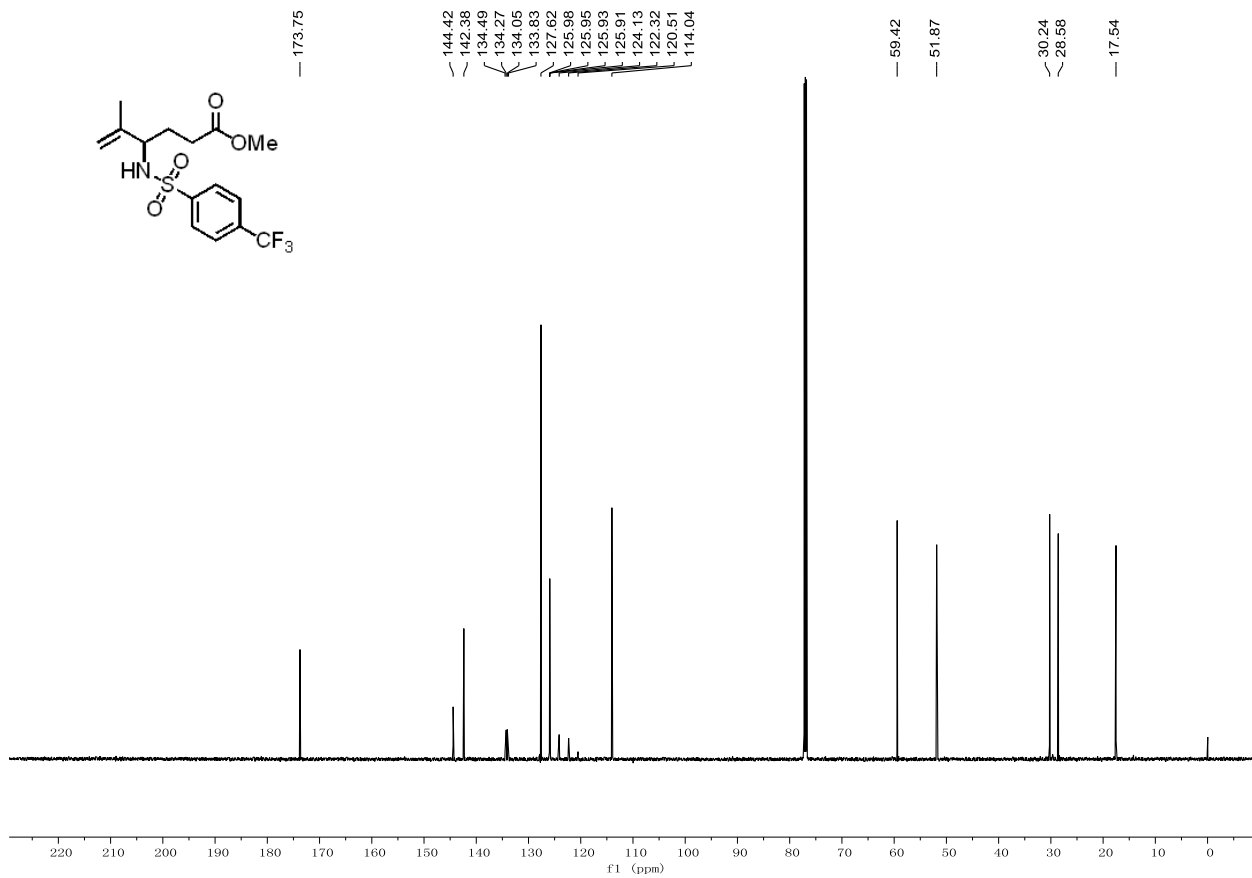

## 5 X-Ray Crystallographic Analysis

### 5.1 X-Ray Crystallographic Analysis of Iodo Lactam 3a

#### Experimental Summary

A colorless crystal was affixed to a Cryo-Loop and cooled to 100K. Data were collected and refined as given in Table S1-S5. A Bruker D8 platform diffractometer with an Ultra rotating-anode source equipped with microfocus optics was used to collect the data. All processing of the data was by standard routines and proceeded without complication. H atoms were idealized as isotropic contributions. All software is contained in the current SHELXTL library maintained by Bruker XRD (Madison, WI).

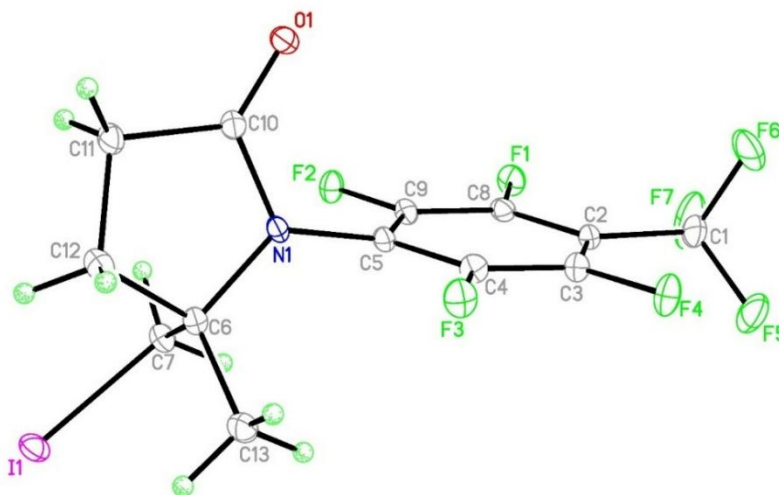

Table S1. Crystal data and structure refinement for yu33.

|                                   |                                                     |                    |
|-----------------------------------|-----------------------------------------------------|--------------------|
| Identification code               | yu33                                                |                    |
| Empirical formula                 | C <sub>13</sub> H <sub>9</sub> F <sub>7</sub> I N O |                    |
| Formula weight                    | 455.11                                              |                    |
| Temperature                       | 100(2) K                                            |                    |
| Wavelength                        | 0.71073 Å                                           |                    |
| Crystal system                    | Monoclinic                                          |                    |
| Space group                       | P 21/c                                              |                    |
| Unit cell dimensions              | a = 6.1326(4) Å                                     | α = 90°.           |
|                                   | b = 27.1761(14) Å                                   | β = 103.6510(10)°. |
|                                   | c = 8.9213(5) Å                                     | γ = 90°.           |
| Volume                            | 1444.82(14) Å <sup>3</sup>                          |                    |
| Z                                 | 4                                                   |                    |
| Density (calculated)              | 2.092 Mg/m <sup>3</sup>                             |                    |
| Absorption coefficient            | 2.297 mm <sup>-1</sup>                              |                    |
| F(000)                            | 872                                                 |                    |
| Crystal size                      | 0.290 x 0.230 x 0.080 mm <sup>3</sup>               |                    |
| Theta range for data collection   | 2.466 to 28.295°.                                   |                    |
| Index ranges                      | -7 ≤ h ≤ 8, -36 ≤ k ≤ 36, -11 ≤ l ≤ 11              |                    |
| Reflections collected             | 19340                                               |                    |
| Independent reflections           | 3580 [R(int) = 0.0282]                              |                    |
| Completeness to theta = 25.000°   | 99.9 %                                              |                    |
| Absorption correction             | Multi-scan                                          |                    |
| Refinement method                 | Full-matrix least-squares on F <sup>2</sup>         |                    |
| Data / restraints / parameters    | 3580 / 0 / 209                                      |                    |
| Goodness-of-fit on F <sup>2</sup> | 1.224                                               |                    |
| Final R indices [I > 2σ(I)]       | R1 = 0.0493, wR2 = 0.1166                           |                    |
| R indices (all data)              | R1 = 0.0498, wR2 = 0.1168                           |                    |
| Extinction coefficient            | n/a                                                 |                    |
| Largest diff. peak and hole       | 4.310 and -1.099 e.Å <sup>-3</sup>                  |                    |



Table S2. Atomic coordinates ( $\times 10^4$ ) and equivalent isotropic displacement parameters ( $\text{\AA}^2 \times 10^3$ ) for yu33.  $U(\text{eq})$  is defined as one third of the trace of the orthogonalized  $U_{ij}$  tensor.

|       | x        | y       | z       | $U(\text{eq})$ |
|-------|----------|---------|---------|----------------|
| I(1)  | 4410(1)  | 4262(1) | -817(1) | 26(1)          |
| F(1)  | 9448(5)  | 3501(1) | 7387(3) | 27(1)          |
| F(2)  | 7559(5)  | 4127(1) | 5178(3) | 24(1)          |
| F(3)  | 606(5)   | 3319(1) | 4597(3) | 26(1)          |
| F(4)  | 2510(6)  | 2664(1) | 6736(4) | 32(1)          |
| F(5)  | 6428(7)  | 2229(1) | 7982(4) | 43(1)          |
| F(6)  | 6306(10) | 2787(2) | 9624(4) | 68(2)          |
| F(7)  | 9219(7)  | 2705(2) | 8808(6) | 61(1)          |
| O(1)  | 3069(6)  | 4670(1) | 5737(4) | 23(1)          |
| N(1)  | 2972(6)  | 4111(1) | 3792(4) | 17(1)          |
| C(1)  | 7033(10) | 2690(2) | 8363(6) | 31(1)          |
| C(2)  | 6034(9)  | 3049(2) | 7090(5) | 22(1)          |
| C(3)  | 3785(9)  | 3018(2) | 6345(6) | 23(1)          |
| C(4)  | 2810(8)  | 3355(2) | 5240(5) | 20(1)          |
| C(5)  | 4037(8)  | 3739(2) | 4806(5) | 17(1)          |
| C(6)  | 2515(8)  | 4092(2) | 2070(5) | 19(1)          |
| C(7)  | 4761(8)  | 4182(2) | 1640(5) | 22(1)          |
| C(8)  | 7279(8)  | 3433(2) | 6676(5) | 20(1)          |
| C(9)  | 6304(8)  | 3766(2) | 5547(5) | 20(1)          |
| C(10) | 2605(7)  | 4567(2) | 4371(5) | 18(1)          |
| C(11) | 1552(8)  | 4889(2) | 3017(5) | 23(1)          |
| C(12) | 909(8)   | 4535(2) | 1666(6) | 24(1)          |
| C(13) | 1457(9)  | 3609(2) | 1438(6) | 27(1)          |

Table S3. Bond lengths [Å] and angles [°] for *yu33*.

|                 |          |                   |          |
|-----------------|----------|-------------------|----------|
| I(1)-C(7)       | 2.162(5) | C(1)-C(2)         | 1.512(7) |
| F(1)-C(8)       | 1.345(5) | C(2)-C(3)         | 1.385(7) |
| F(2)-C(9)       | 1.335(5) | C(2)-C(8)         | 1.395(7) |
| F(3)-C(4)       | 1.342(5) | C(3)-C(4)         | 1.374(7) |
| F(4)-C(3)       | 1.337(5) | C(4)-C(5)         | 1.394(6) |
| F(5)-C(1)       | 1.328(6) | C(5)-C(9)         | 1.393(6) |
| F(6)-C(1)       | 1.330(7) | C(6)-C(13)        | 1.514(7) |
| F(7)-C(1)       | 1.306(7) | C(6)-C(7)         | 1.534(7) |
| O(1)-C(10)      | 1.216(6) | C(6)-C(12)        | 1.544(7) |
| N(1)-C(10)      | 1.382(6) | C(8)-C(9)         | 1.379(6) |
| N(1)-C(5)       | 1.410(5) | C(10)-C(11)       | 1.508(6) |
| N(1)-C(6)       | 1.496(6) | C(11)-C(12)       | 1.520(7) |
| C(10)-N(1)-C(5) | 119.7(4) | N(1)-C(6)-C(13)   | 111.9(4) |
| C(10)-N(1)-C(6) | 114.0(4) | N(1)-C(6)-C(7)    | 106.9(4) |
| C(5)-N(1)-C(6)  | 125.5(4) | C(13)-C(6)-C(7)   | 112.1(4) |
| F(7)-C(1)-F(5)  | 108.2(5) | N(1)-C(6)-C(12)   | 99.6(3)  |
| F(7)-C(1)-F(6)  | 105.2(5) | C(13)-C(6)-C(12)  | 113.3(4) |
| F(5)-C(1)-F(6)  | 105.9(5) | C(7)-C(6)-C(12)   | 112.3(4) |
| F(7)-C(1)-C(2)  | 114.4(5) | C(6)-C(7)-I(1)    | 112.9(3) |
| F(5)-C(1)-C(2)  | 112.1(4) | F(1)-C(8)-C(9)    | 117.7(4) |
| F(6)-C(1)-C(2)  | 110.5(5) | F(1)-C(8)-C(2)    | 121.4(4) |
| C(3)-C(2)-C(8)  | 117.6(4) | C(9)-C(8)-C(2)    | 121.0(4) |
| C(3)-C(2)-C(1)  | 120.2(5) | F(2)-C(9)-C(8)    | 119.1(4) |
| C(8)-C(2)-C(1)  | 122.1(5) | F(2)-C(9)-C(5)    | 119.3(4) |
| F(4)-C(3)-C(4)  | 119.0(5) | C(8)-C(9)-C(5)    | 121.6(4) |
| F(4)-C(3)-C(2)  | 119.7(4) | O(1)-C(10)-N(1)   | 124.0(4) |
| C(4)-C(3)-C(2)  | 121.3(4) | O(1)-C(10)-C(11)  | 128.6(4) |
| F(3)-C(4)-C(3)  | 118.8(4) | N(1)-C(10)-C(11)  | 107.3(4) |
| F(3)-C(4)-C(5)  | 119.4(4) | C(10)-C(11)-C(12) | 104.4(4) |
| C(3)-C(4)-C(5)  | 121.7(4) | C(11)-C(12)-C(6)  | 106.1(4) |
| C(9)-C(5)-C(4)  | 116.8(4) |                   |          |
| C(9)-C(5)-N(1)  | 121.8(4) |                   |          |
| C(4)-C(5)-N(1)  | 121.1(4) |                   |          |

Table S4. Anisotropic displacement parameters ( $\text{\AA}^2 \times 10^3$ ) for yu33. The anisotropic displacement factor exponent takes the form:  $-2\pi^2 [ h^2 a^{*2} U^{11} + \dots + 2 h k a^* b^* U^{12} ]$

|       | U11    | U22   | U33   | U23   | U13    | U12   |
|-------|--------|-------|-------|-------|--------|-------|
| I(1)  | 30(1)  | 30(1) | 18(1) | -2(1) | 8(1)   | -2(1) |
| F(1)  | 22(1)  | 30(2) | 24(1) | 3(1)  | -4(1)  | 0(1)  |
| F(2)  | 22(1)  | 23(1) | 27(1) | 7(1)  | 4(1)   | -4(1) |
| F(3)  | 20(1)  | 30(2) | 29(2) | 4(1)  | 4(1)   | -5(1) |
| F(4)  | 33(2)  | 25(2) | 38(2) | 11(1) | 11(1)  | -6(1) |
| F(5)  | 56(2)  | 22(2) | 43(2) | 9(1)  | -6(2)  | -1(2) |
| F(6)  | 132(5) | 52(2) | 26(2) | 17(2) | 27(2)  | 26(3) |
| F(7)  | 44(2)  | 49(2) | 74(3) | 37(2) | -18(2) | -4(2) |
| O(1)  | 28(2)  | 24(2) | 17(2) | 0(1)  | 6(1)   | 6(1)  |
| N(1)  | 21(2)  | 18(2) | 12(2) | 3(1)  | 4(1)   | 2(1)  |
| C(1)  | 43(3)  | 22(2) | 24(2) | 8(2)  | 3(2)   | 2(2)  |
| C(2)  | 34(3)  | 17(2) | 15(2) | 3(2)  | 6(2)   | 4(2)  |
| C(3)  | 30(3)  | 19(2) | 21(2) | 2(2)  | 9(2)   | -2(2) |
| C(4)  | 18(2)  | 22(2) | 20(2) | 0(2)  | 4(2)   | -1(2) |
| C(5)  | 21(2)  | 17(2) | 13(2) | 2(2)  | 2(2)   | 3(2)  |
| C(6)  | 21(2)  | 19(2) | 16(2) | 2(2)  | 4(2)   | 1(2)  |
| C(7)  | 23(2)  | 25(2) | 18(2) | 2(2)  | 6(2)   | 0(2)  |
| C(8)  | 21(2)  | 20(2) | 15(2) | -1(2) | 1(2)   | 3(2)  |
| C(9)  | 23(2)  | 21(2) | 16(2) | 2(2)  | 6(2)   | -1(2) |
| C(10) | 17(2)  | 21(2) | 18(2) | 3(2)  | 7(2)   | 4(2)  |
| C(11) | 26(2)  | 26(2) | 19(2) | 4(2)  | 5(2)   | 10(2) |
| C(12) | 23(2)  | 31(2) | 19(2) | 2(2)  | 5(2)   | 5(2)  |
| C(13) | 35(3)  | 26(2) | 19(2) | -1(2) | 2(2)   | -8(2) |

Table S5. Hydrogen coordinates ( $\times 10^4$ ) and isotropic displacement parameters ( $\text{\AA}^2 \times 10^3$ ) for yu33.

|      | x    | y    | z    | U(eq) |
|------|------|------|------|-------|
| H(9) | 5780 | 3902 | 2016 | 26    |
| H(8) | 5459 | 4483 | 2166 | 26    |
| H(1) | 2634 | 5138 | 2828 | 28    |
| H(4) | 211  | 5060 | 3199 | 28    |
| H(3) | 1081 | 4694 | 703  | 29    |
| H(2) | -669 | 4428 | 1525 | 29    |
| H(5) | 2519 | 3340 | 1790 | 41    |
| H(7) | 1073 | 3620 | 308  | 41    |
| H(6) | 92   | 3554 | 1807 | 41    |

## 5.2 X-Ray Crystallographic Analysis of Vinyl Lactam 7a

### Experimental Summary

A colorless crystal was affixed to a Cryo-Loop and cooled to 100K. Data were collected and refined as given in Table S6-S10. A Bruker D8 platform diffractometer with an Ultra rotating-anode source equipped with microfocus optics was used to collect the data. All processing of the data was by standard routines and proceeded without complication. H atoms were idealized as isotropic contributions. All software is contained in the current SHELXTL library maintained by Bruker XRD (Madison, WI).

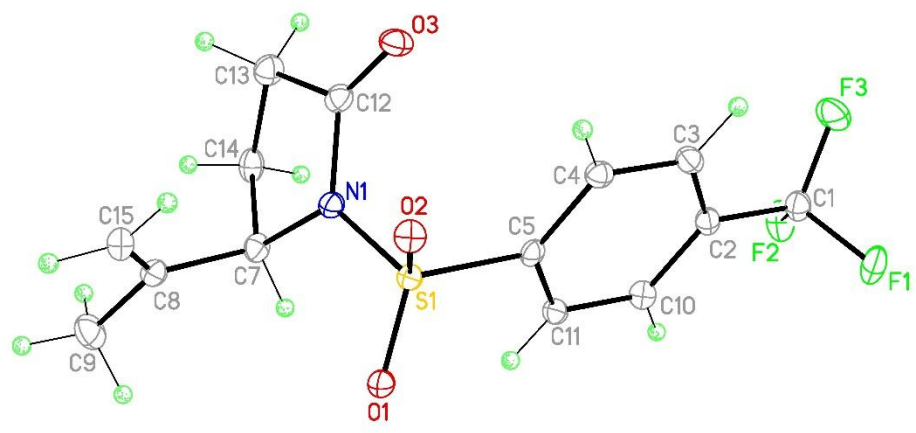

Table S6. Crystal data and structure refinement for yu37.

|                                   |                                                                   |                  |
|-----------------------------------|-------------------------------------------------------------------|------------------|
| Identification code               | yu37                                                              |                  |
| Empirical formula                 | C <sub>15</sub> H <sub>14</sub> F <sub>3</sub> N O <sub>3</sub> S |                  |
| Formula weight                    | 345.33                                                            |                  |
| Temperature                       | 100(2) K                                                          |                  |
| Wavelength                        | 0.71073 Å                                                         |                  |
| Crystal system                    | Monoclinic                                                        |                  |
| Space group                       | P 21/n                                                            |                  |
| Unit cell dimensions              | a = 8.2394(5) Å                                                   | α = 90°.         |
|                                   | b = 16.8092(7) Å                                                  | β = 106.356(2)°. |
|                                   | c = 10.9777(5) Å                                                  | γ = 90°.         |
| Volume                            | 1458.86(13) Å <sup>3</sup>                                        |                  |
| Z                                 | 4                                                                 |                  |
| Density (calculated)              | 1.572 Mg/m <sup>3</sup>                                           |                  |
| Absorption coefficient            | 0.270 mm <sup>-1</sup>                                            |                  |
| F(000)                            | 712                                                               |                  |
| Crystal size                      | 0.300 x 0.270 x 0.240 mm <sup>3</sup>                             |                  |
| Theta range for data collection   | 2.282 to 25.344°.                                                 |                  |
| Index ranges                      | -6 ≤ h ≤ 9, -20 ≤ k ≤ 18, -12 ≤ l ≤ 13                            |                  |
| Reflections collected             | 8451                                                              |                  |
| Independent reflections           | 2664 [R(int) = 0.0215]                                            |                  |
| Completeness to theta = 25.000°   | 99.7 %                                                            |                  |
| Absorption correction             | Multi-scan                                                        |                  |
| Refinement method                 | Full-matrix least-squares on F <sup>2</sup>                       |                  |
| Data / restraints / parameters    | 2664 / 0 / 200                                                    |                  |
| Goodness-of-fit on F <sup>2</sup> | 1.095                                                             |                  |
| Final R indices [I > 2σ(I)]       | R1 = 0.0382, wR2 = 0.0915                                         |                  |
| R indices (all data)              | R1 = 0.0434, wR2 = 0.0944                                         |                  |
| Extinction coefficient            | n/a                                                               |                  |
| Largest diff. peak and hole       | 0.667 and -0.412 e.Å <sup>-3</sup>                                |                  |

Table S7. Atomic coordinates ( $\times 10^4$ ) and equivalent isotropic displacement parameters ( $\text{\AA}^2 \times 10^3$ ) for yu37.  $U(\text{eq})$  is defined as one third of the trace of the orthogonalized  $U_{ij}$  tensor.

|       | x       | y        | z        | $U(\text{eq})$ |
|-------|---------|----------|----------|----------------|
| S(1)  | 6773(1) | 7063(1)  | 206(1)   | 19(1)          |
| F(1)  | 7762(2) | 10693(1) | -1845(1) | 35(1)          |
| F(2)  | 5378(2) | 10860(1) | -1454(1) | 37(1)          |
| F(3)  | 7692(2) | 10991(1) | 37(1)    | 42(1)          |
| O(1)  | 5954(2) | 6663(1)  | -947(1)  | 24(1)          |
| O(2)  | 8404(2) | 6812(1)  | 955(1)   | 24(1)          |
| O(3)  | 7071(2) | 7715(1)  | 2809(1)  | 27(1)          |
| N(1)  | 5423(2) | 7026(1)  | 1082(2)  | 21(1)          |
| C(1)  | 6921(3) | 10550(1) | -988(2)  | 26(1)          |
| C(2)  | 6883(3) | 9683(1)  | -676(2)  | 22(1)          |
| C(3)  | 8106(3) | 9374(1)  | 363(2)   | 23(1)          |
| C(4)  | 8098(3) | 8569(1)  | 651(2)   | 22(1)          |
| C(5)  | 6851(2) | 8093(1)  | -121(2)  | 19(1)          |
| C(7)  | 3728(2) | 6652(1)  | 664(2)   | 23(1)          |
| C(8)  | 3782(3) | 5763(1)  | 887(2)   | 24(1)          |
| C(9)  | 2133(3) | 5357(2)  | 246(2)   | 36(1)          |
| C(10) | 5646(3) | 9197(1)  | -1450(2) | 24(1)          |
| C(11) | 5625(3) | 8391(1)  | -1162(2) | 22(1)          |
| C(12) | 5749(3) | 7393(1)  | 2270(2)  | 24(1)          |
| C(13) | 4169(3) | 7300(1)  | 2695(2)  | 29(1)          |
| C(14) | 2784(3) | 7107(1)  | 1479(2)  | 28(1)          |
| C(15) | 5132(3) | 5377(1)  | 1573(2)  | 29(1)          |



Table S8. Bond lengths [Å] and angles [°] for yu37.

|                 |            |                   |            |
|-----------------|------------|-------------------|------------|
| S(1)-O(1)       | 1.4236(15) | C(2)-C(3)         | 1.392(3)   |
| S(1)-O(2)       | 1.4279(15) | C(3)-C(4)         | 1.389(3)   |
| S(1)-N(1)       | 1.6640(17) | C(4)-C(5)         | 1.387(3)   |
| S(1)-C(5)       | 1.773(2)   | C(5)-C(11)        | 1.388(3)   |
| F(1)-C(1)       | 1.338(2)   | C(7)-C(8)         | 1.513(3)   |
| F(2)-C(1)       | 1.335(3)   | C(7)-C(14)        | 1.543(3)   |
| F(3)-C(1)       | 1.348(3)   | C(8)-C(15)        | 1.324(3)   |
| O(3)-C(12)      | 1.211(3)   | C(8)-C(9)         | 1.506(3)   |
| N(1)-C(12)      | 1.398(3)   | C(10)-C(11)       | 1.394(3)   |
| N(1)-C(7)       | 1.482(2)   | C(12)-C(13)       | 1.509(3)   |
| C(1)-C(2)       | 1.500(3)   | C(13)-C(14)       | 1.527(3)   |
| C(2)-C(10)      | 1.392(3)   |                   |            |
| O(1)-S(1)-O(2)  | 120.43(9)  | C(4)-C(5)-S(1)    | 120.20(16) |
| O(1)-S(1)-N(1)  | 105.68(9)  | C(11)-C(5)-S(1)   | 117.34(15) |
| O(2)-S(1)-N(1)  | 109.27(9)  | N(1)-C(7)-C(8)    | 112.72(17) |
| O(1)-S(1)-C(5)  | 108.39(9)  | N(1)-C(7)-C(14)   | 101.26(16) |
| O(2)-S(1)-C(5)  | 108.82(9)  | C(8)-C(7)-C(14)   | 113.12(17) |
| N(1)-S(1)-C(5)  | 102.82(9)  | C(15)-C(8)-C(9)   | 123.1(2)   |
| C(12)-N(1)-C(7) | 113.12(17) | C(15)-C(8)-C(7)   | 123.89(19) |
| C(12)-N(1)-S(1) | 122.58(14) | C(9)-C(8)-C(7)    | 112.98(19) |
| C(7)-N(1)-S(1)  | 124.19(14) | C(2)-C(10)-C(11)  | 119.1(2)   |
| F(2)-C(1)-F(1)  | 106.72(18) | C(5)-C(11)-C(10)  | 119.00(19) |
| F(2)-C(1)-F(3)  | 106.20(18) | O(3)-C(12)-N(1)   | 124.2(2)   |
| F(1)-C(1)-F(3)  | 105.86(17) | O(3)-C(12)-C(13)  | 129.1(2)   |
| F(2)-C(1)-C(2)  | 112.76(18) | N(1)-C(12)-C(13)  | 106.65(18) |
| F(1)-C(1)-C(2)  | 112.54(18) | C(12)-C(13)-C(14) | 104.42(18) |
| F(3)-C(1)-C(2)  | 112.25(18) | C(13)-C(14)-C(7)  | 103.75(17) |
| C(10)-C(2)-C(3) | 121.16(19) |                   |            |
| C(10)-C(2)-C(1) | 119.27(19) |                   |            |
| C(3)-C(2)-C(1)  | 119.55(19) |                   |            |
| C(4)-C(3)-C(2)  | 120.08(19) |                   |            |
| C(5)-C(4)-C(3)  | 118.23(19) |                   |            |
| C(4)-C(5)-C(11) | 122.47(19) |                   |            |

---

Symmetry transformations used to generate equivalent atoms:

Table S9. Anisotropic displacement parameters ( $\text{\AA}^2 \times 10^3$ ) for yu37. The anisotropic displacement factor exponent takes the form:  $-2\pi^2 [ h^2 a^{*2} U^{11} + \dots + 2 h k a^* b^* U^{12} ]$

|       | U <sup>11</sup> | U <sup>22</sup> | U <sup>33</sup> | U <sup>23</sup> | U <sup>13</sup> | U <sup>12</sup> |
|-------|-----------------|-----------------|-----------------|-----------------|-----------------|-----------------|
| S(1)  | 19(1)           | 20(1)           | 19(1)           | 0(1)            | 6(1)            | -1(1)           |
| F(1)  | 43(1)           | 26(1)           | 47(1)           | 7(1)            | 29(1)           | 1(1)            |
| F(2)  | 30(1)           | 25(1)           | 60(1)           | 9(1)            | 17(1)           | 6(1)            |
| F(3)  | 62(1)           | 23(1)           | 39(1)           | -6(1)           | 10(1)           | -8(1)           |
| O(1)  | 26(1)           | 26(1)           | 20(1)           | 0(1)            | 6(1)            | -6(1)           |
| O(2)  | 22(1)           | 25(1)           | 27(1)           | 1(1)            | 7(1)            | 2(1)            |
| O(3)  | 24(1)           | 34(1)           | 23(1)           | -6(1)           | 4(1)            | -4(1)           |
| N(1)  | 20(1)           | 23(1)           | 19(1)           | 0(1)            | 6(1)            | -3(1)           |
| C(1)  | 26(1)           | 24(1)           | 31(1)           | 0(1)            | 13(1)           | -1(1)           |
| C(2)  | 23(1)           | 19(1)           | 27(1)           | -2(1)           | 13(1)           | 0(1)            |
| C(3)  | 22(1)           | 24(1)           | 26(1)           | -5(1)           | 9(1)            | -4(1)           |
| C(4)  | 21(1)           | 25(1)           | 21(1)           | -1(1)           | 7(1)            | 0(1)            |
| C(5)  | 19(1)           | 21(1)           | 21(1)           | 1(1)            | 11(1)           | 0(1)            |
| C(7)  | 16(1)           | 27(1)           | 24(1)           | 3(1)            | 4(1)            | -3(1)           |
| C(8)  | 26(1)           | 26(1)           | 22(1)           | -1(1)           | 11(1)           | -5(1)           |
| C(9)  | 32(1)           | 33(1)           | 43(1)           | -5(1)           | 10(1)           | -11(1)          |
| C(10) | 23(1)           | 24(1)           | 26(1)           | 1(1)            | 7(1)            | 1(1)            |
| C(11) | 21(1)           | 24(1)           | 23(1)           | -3(1)           | 9(1)            | -4(1)           |
| C(12) | 27(1)           | 23(1)           | 21(1)           | 3(1)            | 7(1)            | 3(1)            |
| C(13) | 30(1)           | 30(1)           | 30(1)           | 0(1)            | 15(1)           | 1(1)            |
| C(14) | 24(1)           | 24(1)           | 38(1)           | 5(1)            | 14(1)           | 1(1)            |
| C(15) | 35(1)           | 23(1)           | 28(1)           | 2(1)            | 9(1)            | -5(1)           |

Table S10. Hydrogen coordinates ( $\times 10^4$ ) and isotropic displacement parameters ( $\text{\AA}^2 \times 10^{-3}$ ) for yu37.

|       | x    | y    | z     | U(eq) |
|-------|------|------|-------|-------|
| H(5)  | 8946 | 9713 | 875   | 28    |
| H(6)  | 8924 | 8351 | 1358  | 26    |
| H(11) | 3194 | 6768 | -255  | 27    |
| H(14) | 2231 | 4787 | 440   | 54    |
| H(2)  | 1866 | 5434 | -674  | 54    |
| H(1)  | 1230 | 5586 | 555   | 54    |
| H(3)  | 4828 | 9413 | -2164 | 29    |
| H(4)  | 4785 | 8049 | -1671 | 26    |
| H(7)  | 3908 | 7798 | 3083  | 35    |
| H(8)  | 4300 | 6863 | 3319  | 35    |
| H(10) | 2262 | 7599 | 1047  | 33    |
| H(9)  | 1893 | 6772 | 1661  | 33    |
| H(12) | 5088 | 4818 | 1679  | 34    |
| H(13) | 6145 | 5660 | 1959  | 34    |
